# Supplementary material for: Reactions of Rh(PNP) pincer complexes with terminal alkynes: homocoupling through a ring or not at all
Source: Royal Society of Chemistry journal article supplement (doi:10.1039/d0dt03550e), 2020-01-01
Supplement: d0dt03550e1.pdf [file d0dt03550e1.pdf]

Supporting information for:

## Reactions of Rh(PNP) pincer complexes with terminal alkynes: homocoupling through a ring or not at all

### Table of contents

|                                                                                                                                                                                                                                           |    |
|-------------------------------------------------------------------------------------------------------------------------------------------------------------------------------------------------------------------------------------------|----|
| 1. General experimental methods.....                                                                                                                                                                                                      | 1  |
| 2. Reaction of [Rh(PNP- <i>t</i> Bu)(CCH <i>t</i> Bu)][BAR <sup>F</sup> <sub>4</sub> ] (II) with excess HC≡C <i>t</i> Bu .....                                                                                                            | 2  |
| 3. Deprotection of <i>cis</i> -PNP-14·2BH <sub>3</sub> : preparation of <i>cis</i> -PNP-14.....                                                                                                                                           | 3  |
| 4. [Rh(PNP-14)(η <sup>2</sup> -COD)][BAR <sup>F</sup> <sub>4</sub> ] ( <b>1'</b> ) and {[Rh(PNP-14)} <sub>2</sub> (μ <sub>2</sub> -η <sup>2</sup> :η <sup>2</sup> -COD)][BAR <sup>F</sup> <sub>4</sub> ] <sub>2</sub> ( <b>1''</b> )..... | 4  |
| 5. Synthesis and reactions of [Rh( <i>trans</i> -PNP-14)(CCH <i>t</i> Bu)][BAR <sup>F</sup> <sub>4</sub> ] ( <b>2a</b> ) .....                                                                                                            | 11 |
| 6. Synthesis, isolation and reactions of [Rh( <i>cis</i> -PNP-14)(CCH <i>t</i> Bu)][BAR <sup>F</sup> <sub>4</sub> ] ( <b>2b</b> ) .....                                                                                                   | 17 |
| 7. Preparation of [Rh( <i>trans</i> -PNP-14)( <i>E</i> - <i>t</i> BuC≡CCHC <i>t</i> Bu)][BAR <sup>F</sup> <sub>4</sub> ] ( <b>3a</b> ).....                                                                                               | 24 |
| 8. Reaction of {Rh( <i>trans</i> -PNP-14)} <sup>+</sup> ( <b>1a</b> ) with <i>E</i> - <i>t</i> BuC≡CCHC <i>t</i> Bu .....                                                                                                                 | 26 |
| 9. Preparation of [Rh( <i>cis</i> -PNP-14)(CO)][BAR <sup>F</sup> <sub>4</sub> ] ( <b>4b</b> ) .....                                                                                                                                       | 33 |
| 10. Preparation of [Rh( <i>trans</i> -PONOP-14)( <i>E</i> - <i>t</i> BuC≡CCHC <i>t</i> Bu)][BAR <sup>F</sup> <sub>4</sub> ].....                                                                                                          | 36 |
| 11. References.....                                                                                                                                                                                                                       | 39 |

### 1. General experimental methods

All manipulations were performed under an atmosphere of argon using Schlenk and glove box techniques unless otherwise stated. Glassware was oven dried at 150 °C overnight and flame-dried under vacuum prior to use. Molecular sieves were activated by heating at 300 °C *in vacuo* overnight. 1,2-Difluorobenzene (DFB) was pre-dried over Al<sub>2</sub>O<sub>3</sub>, distilled from calcium hydride and dried twice over 3 Å molecular sieves. CD<sub>2</sub>Cl<sub>2</sub> was freeze-pump-thaw degassed and dried over 3 Å molecular sieves. C<sub>6</sub>D<sub>6</sub> was distilled from sodium and stored over 3 Å molecular sieves. Et<sub>2</sub>NH was distilled from CaH<sub>2</sub>. SiMe<sub>4</sub> was distilled from liquid Na/K alloy and stored over a potassium mirror. Other anhydrous solvents were purchased from Acros Organics or Sigma-Aldrich, freeze-pump-thaw degassed and stored over 3 Å molecular sieves. 3,3-dimethylbutyne (HC≡C*t*Bu) and 1,5-cyclooctadiene (COD) were freeze-pump-thaw degassed and stored over 3 Å molecular sieves. [Rh(PNP-*t*Bu)(CCH*t*Bu)][BAR<sup>F</sup><sub>4</sub>],<sup>1</sup> *cis*-PNP-14·2BH<sub>3</sub>,<sup>2</sup> *trans*-PNP-14,<sup>2</sup> [Rh(COD)<sub>2</sub>][BAR<sup>F</sup><sub>4</sub>],<sup>3</sup> 3,3-dimethylbut-1-yne-*d*<sub>1</sub> (DC≡C*t*Bu),<sup>4</sup> *E*-*t*BuC≡CCHC*t*Bu,<sup>5</sup> and [Rh(*trans*-PONOP-14)(C<sub>2</sub>H<sub>4</sub>)][BAR<sup>F</sup><sub>4</sub>]<sup>2</sup> were synthesized according to published procedures. All other reagents are commercial products and were used as received. NMR spectra were recorded on Bruker spectrometers under argon at 298 K unless otherwise stated. Chemical shifts are quoted in ppm and coupling constants in Hz. NMR spectra in DFB were recorded using an internal capillary of C<sub>6</sub>D<sub>6</sub>. High resolution (HR) ESI-MS were recorded on Bruker Maxis Plus instrument. IR spectra were recorded on a Jasco FT-IR-4700 using a KBr transmission cell in CH<sub>2</sub>Cl<sub>2</sub>. Microanalyses were performed at the London Metropolitan University by Stephen Boyer or Elemental microanalysis Ltd.

## 2. Reaction of [Rh(PNP-*t*Bu)(CCH*t*Bu)][BAR<sup>F</sup><sub>4</sub>] (II) with excess HC≡C*t*Bu

To a solution of II (20.4 mg, 14.1 μmol) in DFB (0.5 mL) within a J. Young valve NMR tube was added HC≡C*t*Bu (2.6 μL, 21.1 μmol). The resulting solution was heated at 80 °C for 16 h. Analysis by <sup>1</sup>H and <sup>31</sup>P NMR spectroscopy indicated no significant reaction had occurred.

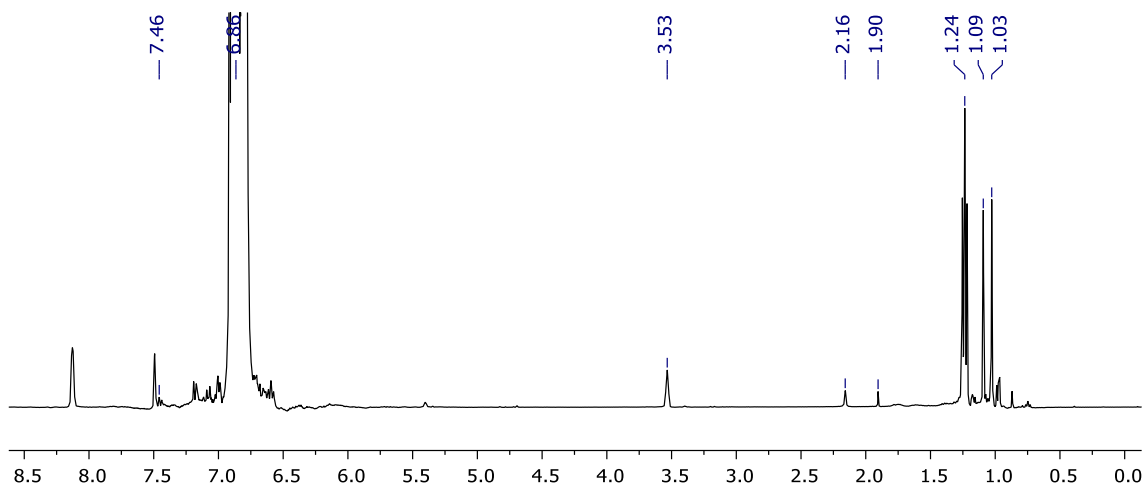

**Figure S1.** <sup>1</sup>H NMR spectrum of the reaction between II and excess HC≡C*t*Bu, after heating at 80 °C for 16 h (DFB, 400 MHz).

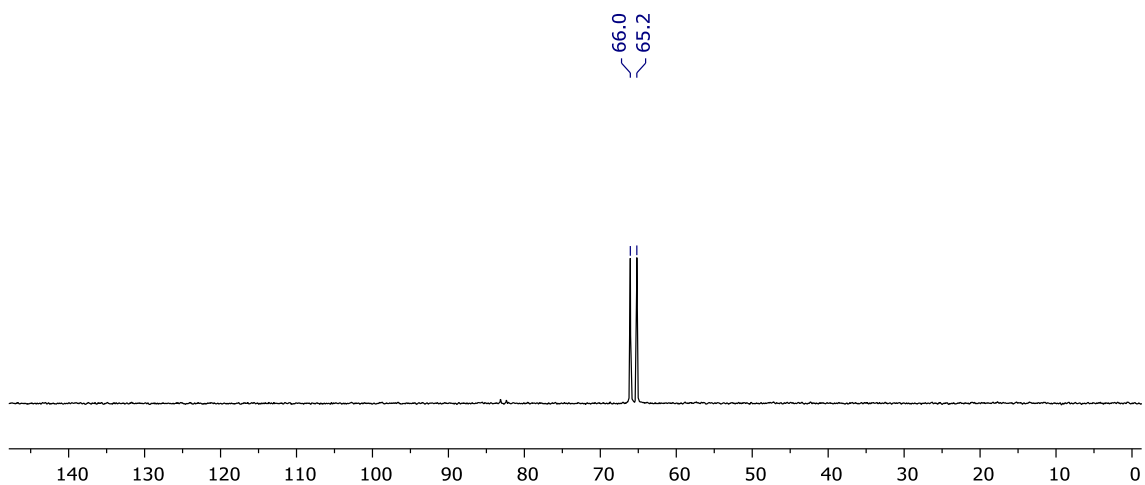

**Figure S2.** <sup>31</sup>P{<sup>1</sup>H} NMR spectrum of the reaction between II and excess HC≡C*t*Bu, after heating at 80 °C for 16 h (DFB, 162 MHz).

### 3. Deprotection of *cis*-PNP-14·2BH<sub>3</sub>: preparation of *cis*-PNP-14

A solution of *cis*-PNP-14·2BH<sub>3</sub> (5.0 mg, 9.89 μmol) in Et<sub>2</sub>NH (0.5 mL) was heated at 85 °C for 2 days within a J Young valve NMR tube. Quantitative conversion was observed by <sup>1</sup>H and <sup>31</sup>P NMR spectroscopy. The volatiles were removed *in vacuo* to afford the product as a colourless oil, which was carried forward without further purification.

<sup>1</sup>H NMR (500 MHz, C<sub>6</sub>D<sub>6</sub>): δ 7.08–7.15 (m, 3H, py), 3.07 (d, <sup>2</sup>J<sub>HH</sub> = 13.3, 2H, pyCH<sub>2</sub>), 3.01 (d, <sup>2</sup>J<sub>HH</sub> = 13.3, 2H, pyCH<sub>2</sub>), 1.57–1.67 (m, 2H, CH<sub>2</sub>), 1.22–1.55 (m, 26H, CH<sub>2</sub>), 1.02 (d, <sup>3</sup>J<sub>PH</sub> = 11.1, 18H, *t*Bu).

<sup>13</sup>C{<sup>1</sup>H} NMR (126 MHz, C<sub>6</sub>D<sub>6</sub>): δ 160.2 (d, <sup>2</sup>J<sub>PC</sub> = 9, py), 136.1 (s, py), 120.8 (d, <sup>3</sup>J<sub>PC</sub> = 8, py), 35.5 (d, <sup>1</sup>J<sub>PC</sub> = 23, pyCH<sub>2</sub>), 30.8 (d, <sup>3</sup>J<sub>PC</sub> = 12, CH<sub>2</sub>), 28.3–28.6 (m, 4×CH<sub>2</sub> + *t*Bu{C}), 27.6 (d, <sup>2</sup>J<sub>PC</sub> = 13, *t*Bu{CH<sub>3</sub>}), 27.0 (d, <sup>2</sup>J<sub>PC</sub> = 18, CH<sub>2</sub>), 24.2 (d, <sup>1</sup>J<sub>PC</sub> = 19, PCH<sub>2</sub>).

<sup>31</sup>P{<sup>1</sup>H} NMR (121 MHz, C<sub>6</sub>D<sub>6</sub>): δ 5.9 (s, 2P).

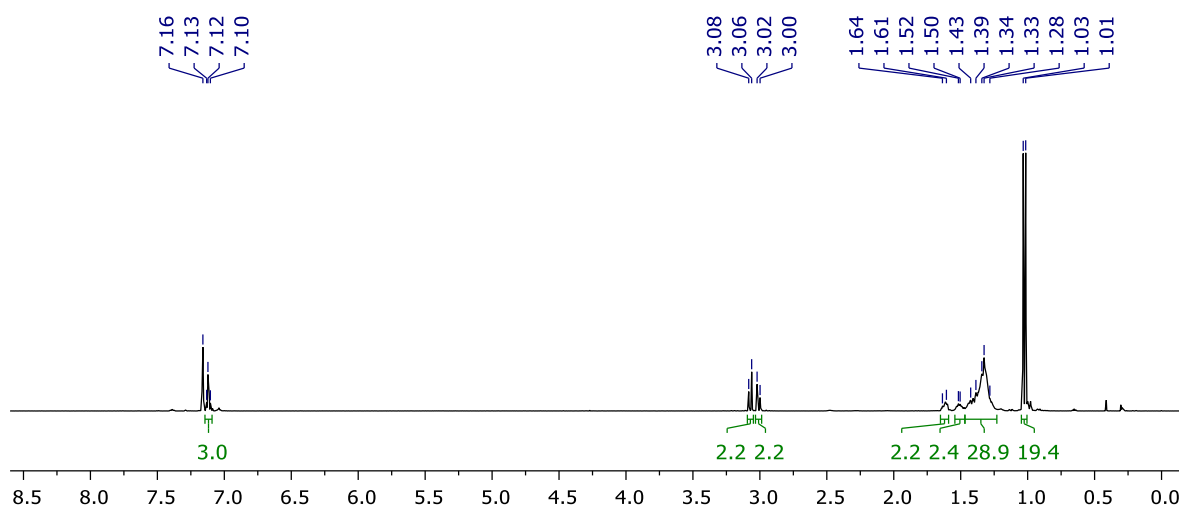

Figure S3. <sup>1</sup>H NMR spectrum of *cis*-PNP-14 (C<sub>6</sub>D<sub>6</sub>, 500 MHz).

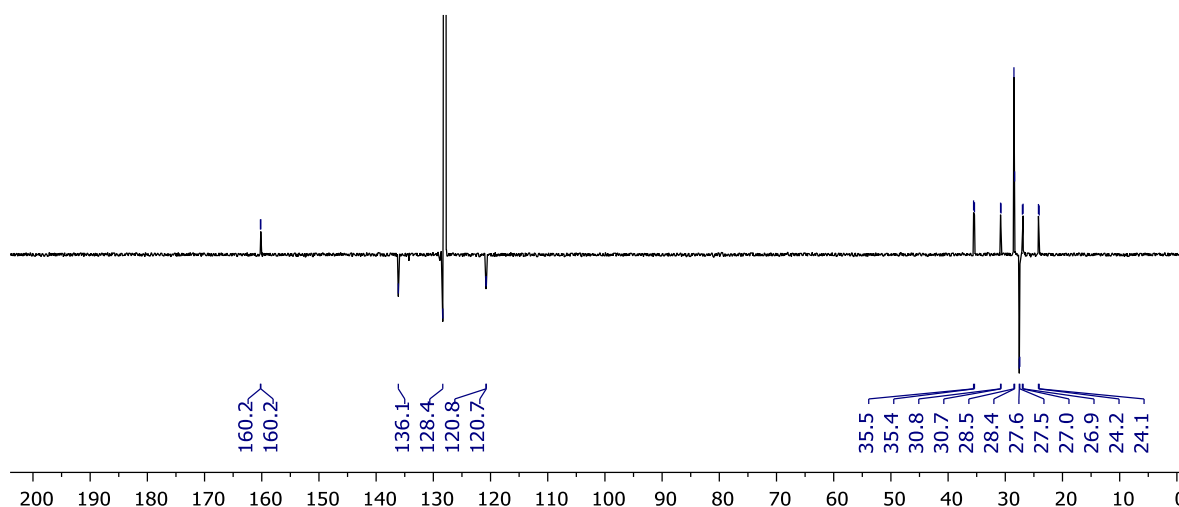

Figure S4. <sup>13</sup>C{<sup>1</sup>H} APT NMR spectrum of *cis*-PNP-14 (C<sub>6</sub>D<sub>6</sub>, 126 MHz).

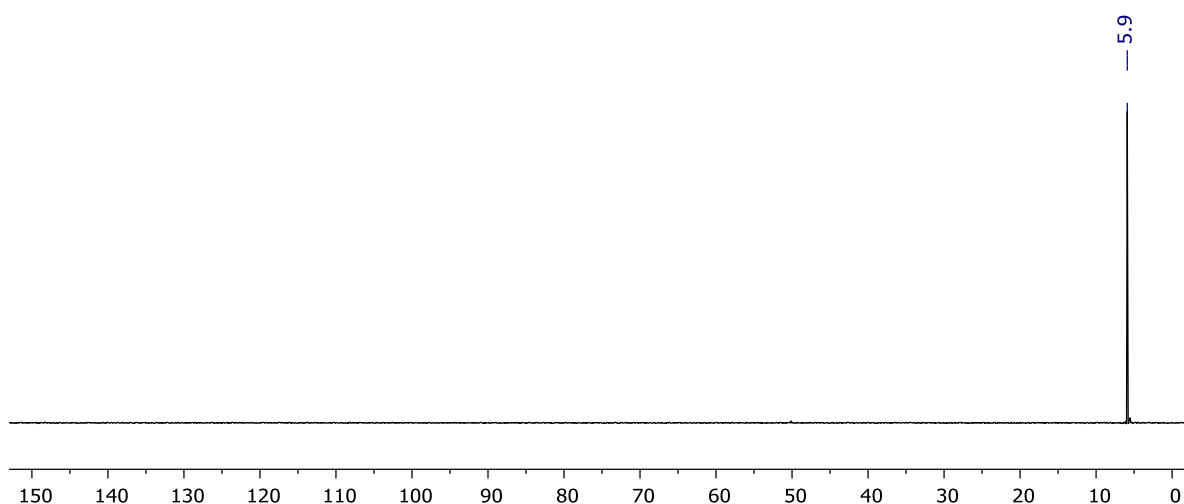

**Figure S5.**  $^{31}\text{P}\{^1\text{H}\}$  NMR spectrum of *cis*-PNP-14 ( $\text{C}_6\text{D}_6$ , 162 MHz).

#### 4. $[\text{Rh}(\text{PNP-14})(\eta^2\text{-COD})][\text{BAR}^{\text{F}}_4]$ (**1'**) and $[\{\text{Rh}(\text{PNP-14})\}_2(\mu_2\text{-}\eta^2\text{:}\eta^2\text{-COD})][\text{BAR}^{\text{F}}_4]_2$ (**1''**)

##### 4.1. Reaction between *trans*-PNP-14 and $[\text{Rh}(\text{COD})_2][\text{BAR}^{\text{F}}_4]$

A solution of *trans*-PNP-14 (5.4 mg, 11.3  $\mu\text{mol}$ ) and  $[\text{Rh}(\text{COD})_2][\text{BAR}^{\text{F}}_4]$  (13.3 mg, 11.2  $\mu\text{mol}$ ) in DFB (0.5 mL) within a J. Young valve NMR tube was stirred for 5 min at RT. Analysis by  $^1\text{H}$  and  $^{31}\text{P}$  NMR spectroscopy indicated formation **1a'** as the major (>95%) organometallic species alongside liberation of COD into solution.

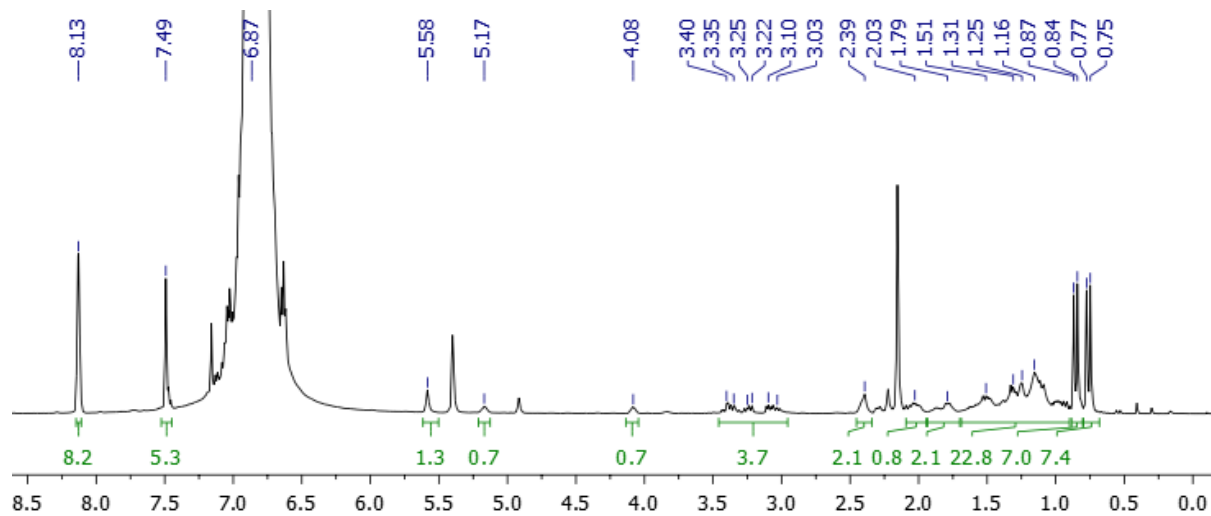

**Figure S6.**  $^1\text{H}$  NMR spectrum of the reaction between *trans*-PNP-14 and  $[\text{Rh}(\text{COD})_2][\text{BAR}^{\text{F}}_4]$  (DFB, 500 MHz).

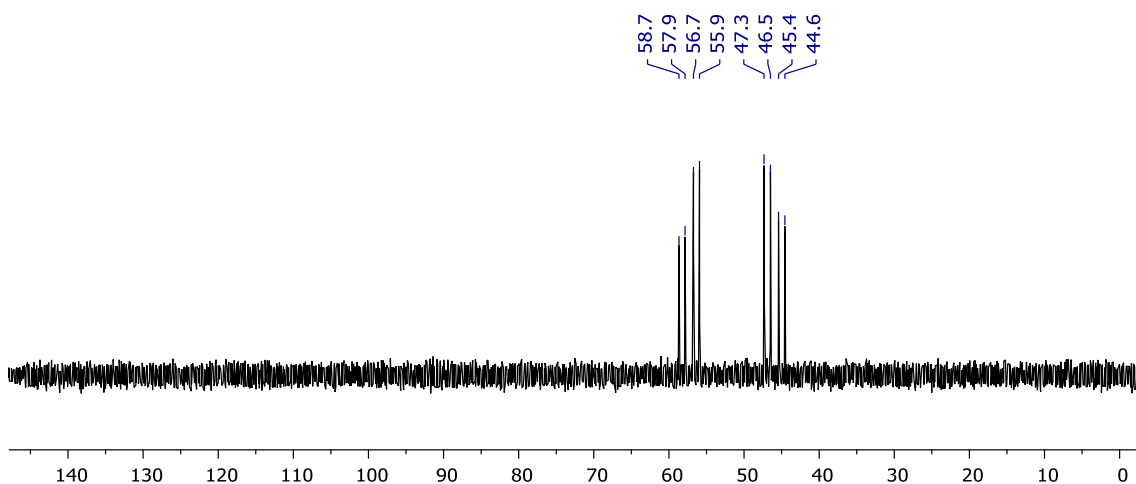

**Figure S7.**  $^{31}\text{P}\{^1\text{H}\}$  NMR of the reaction between *trans*-PNP-14 and  $[\text{Rh}(\text{COD})_2][\text{BAR}^{\text{F}}_4]$  (DFB, 162 MHz).

#### 4.2. Characterisation of $[\text{Rh}(\textit{trans}\text{-PNP-14})(\eta^2\text{-COD})][\text{BAR}^{\text{F}}_4]$ (**1a'**)

A solution of *trans*-PNP-14 (5.4 mg, 11.3  $\mu\text{mol}$ ) and  $[\text{Rh}(\text{COD})_2][\text{BAR}^{\text{F}}_4]$  (13.3 mg, 11.2  $\mu\text{mol}$ ) in DFB (0.5 mL) within a J. Young valve NMR tube was stirred for 5 min at RT and COD (14  $\mu\text{L}$ , 114  $\mu\text{mol}$ ) added resulting in the quantitative formation of **1a'**, which was characterised *in situ* by NMR spectroscopy.

$^1\text{H}$  NMR (500 MHz, DFB, selected data):  $\delta$  7.47 (t,  $^3J_{\text{HH}} = 7.8$ , 1H, py), 7.12 (d,  $^3J_{\text{HH}} = 7.8$ , 1H, py), 7.08 (d,  $^3J_{\text{HH}} = 7.8$ , 1H, py), 5.56–5.61 (m, 2H, CH=CH), 5.12–5.22 (m, 1H, Rh(CH=CH)), 4.05–4.12 (m, 1H, Rh(CH=CH)), 3.42 (dd,  $^2J_{\text{HH}} = 17.1$ ,  $^2J_{\text{PH}} = 6.4$ , 1H, pyCH<sub>2</sub>), 3.35 (ddd,  $^2J_{\text{HH}} = 17.1$ ,  $^2J_{\text{PH}} = 13.1$ ,  $^4J_{\text{PH}} = 2.6$ , 1H, pyCH<sub>2</sub>), 3.25 (dd,  $^2J_{\text{HH}} = 16.6$ ,  $^2J_{\text{PH}} = 10.4$ , 1H, pyCH<sub>2</sub>), 3.09 (dd,  $^2J_{\text{HH}} = 16.9$ ,  $^2J_{\text{PH}} = 7.4$ , 1H, pyCH<sub>2</sub>), 0.86 (d,  $^3J_{\text{PH}} = 13.6$ , 9H, *t*Bu), 0.76 (d,  $^3J_{\text{PH}} = 13.5$ , 9H, *t*Bu).

$^{13}\text{C}\{^1\text{H}\}$  NMR (126 MHz, DFB):  $\delta$  163.2 (obscured, py), 161.1 (d,  $^2J_{\text{PC}} = 6$ , py), 139.2 (s, py), 129.5 (obscured, CH=CH), 120.6 (d,  $^3J_{\text{PC}} = 9$ , py), 120.1 (d,  $^3J_{\text{PC}} = 8$ , py), 81.2 (d,  $^1J_{\text{RhC}} = 12$ , Rh(CH=CH)), 66.9 (d,  $^1J_{\text{RhC}} = 10$ , Rh(CH=CH)), 39.0 (d,  $^1J_{\text{PC}} = 21$ , pyCH<sub>2</sub>), 37.4 (d,  $^1J_{\text{PC}} = 17$ , pyCH<sub>2</sub>), 33.5 (d,  $^1J_{\text{PC}} = 21$ , *t*Bu{C}), 32.0–32.3 (m, *t*Bu{C}), 27.6 (d,  $^2J_{\text{PC}} = 4$ , *t*Bu{CH<sub>3</sub>}), 25.9 (d,  $^2J_{\text{PC}} = 6$ , *t*Bu{CH<sub>3</sub>}).

$^{31}\text{P}\{^1\text{H}\}$  NMR (121 MHz, DFB):  $\delta$  57.4 (dd,  $^2J_{\text{PP}} = 312$ ,  $^1J_{\text{RHP}} = 131$ , 1P), 45.9 (dd,  $^2J_{\text{PP}} = 312$ ,  $^1J_{\text{RHP}} = 138$ , 1P).

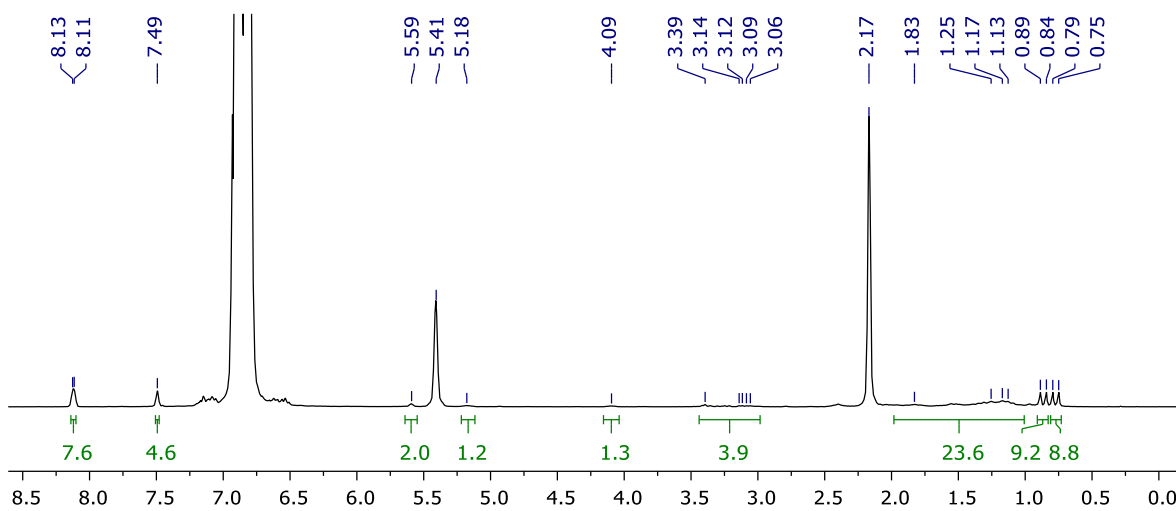

Figure S8.  $^1\text{H}$  NMR spectrum of **1a'** (DFB, 500 MHz)

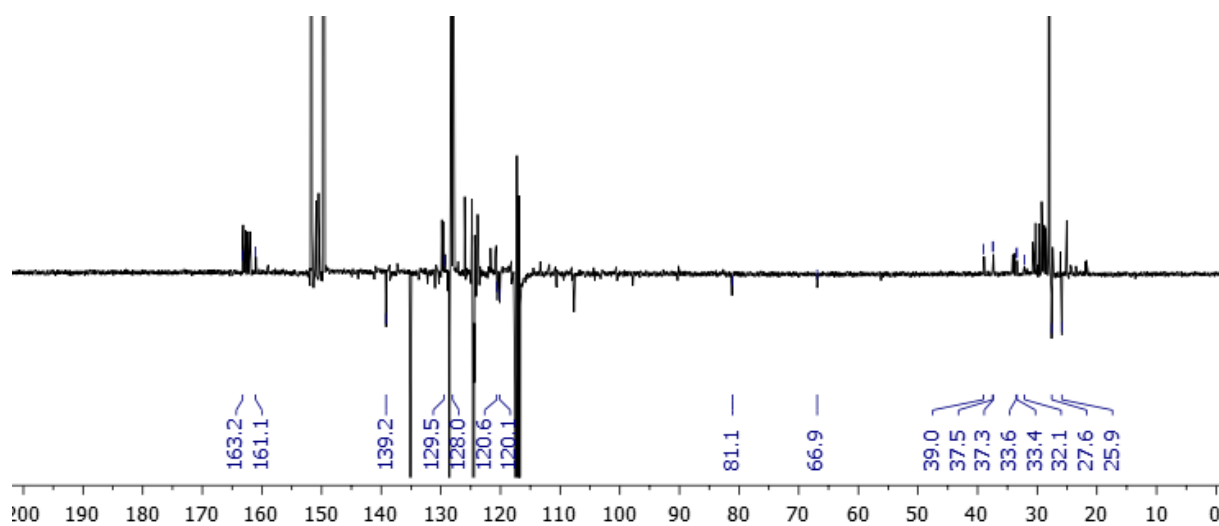

Figure S9.  $^{13}\text{C}\{^1\text{H}\}$  APT NMR spectrum of **1a'** (DFB, 126 MHz).

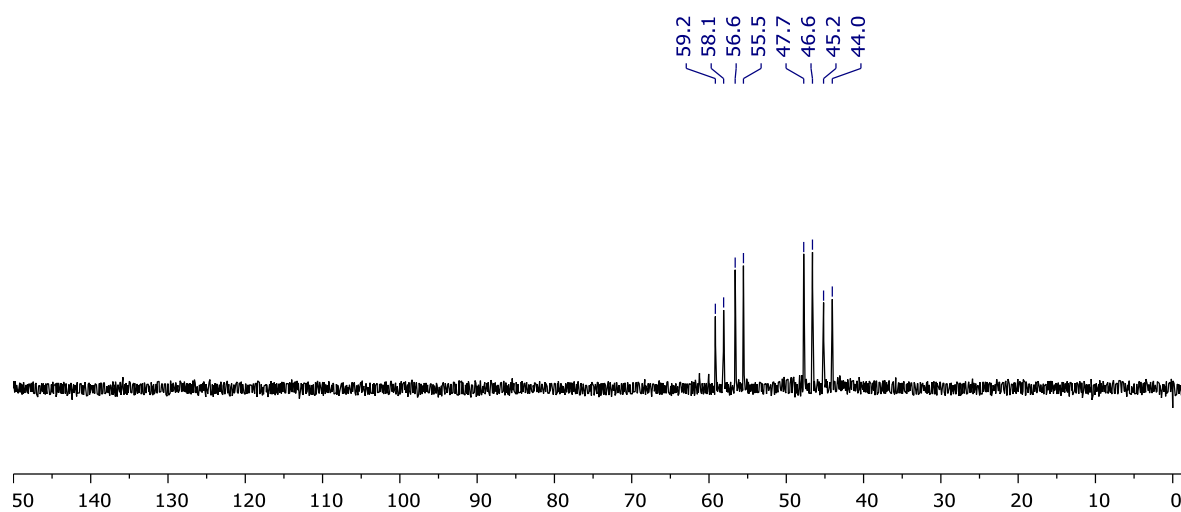

Figure S10.  $^{31}\text{P}\{^1\text{H}\}$  NMR spectrum of **1a'** (DFB, 121 MHz).

### 4.3. Isolation and crystal structure of $\{[\text{Rh}(\text{trans-PNP-14})]_2(\mu_2\text{-}\eta^2\text{:}\eta^2\text{-COD})\}[\text{BAR}^{\text{F}}_4]_2$ (**1a''**)

A solution of *trans*-PNP-14 (15.2 mg, 31.8  $\mu\text{mol}$ ) and  $[\text{Rh}(\text{COD})_2][\text{BAR}^{\text{F}}_4]$  (37.7 mg, 31.9  $\mu\text{mol}$ ) in DFB (0.5 mL) was stirred for 5 min at RT. Volatiles were removed in vacuo and the resulting red oil was washed with pentane (1 mL). The product was obtained as a red crystalline solid by slow diffusion of pentane into an  $\text{Et}_2\text{O}$  solution at  $-30\text{ }^\circ\text{C}$ . Yield: 35.4 mg (11.8  $\mu\text{mol}$ , 74%).

**Anal.** Calcd for  $\text{C}_{130}\text{H}_{142}\text{B}_2\text{F}_{48}\text{N}_2\text{P}_4\text{Rh}_2$  (2995.8  $\text{g mol}^{-1}$ ): C, 52.12; H, 4.78; N, 0.94. Found: C, 52.31; H, 4.78; N, 1.02.

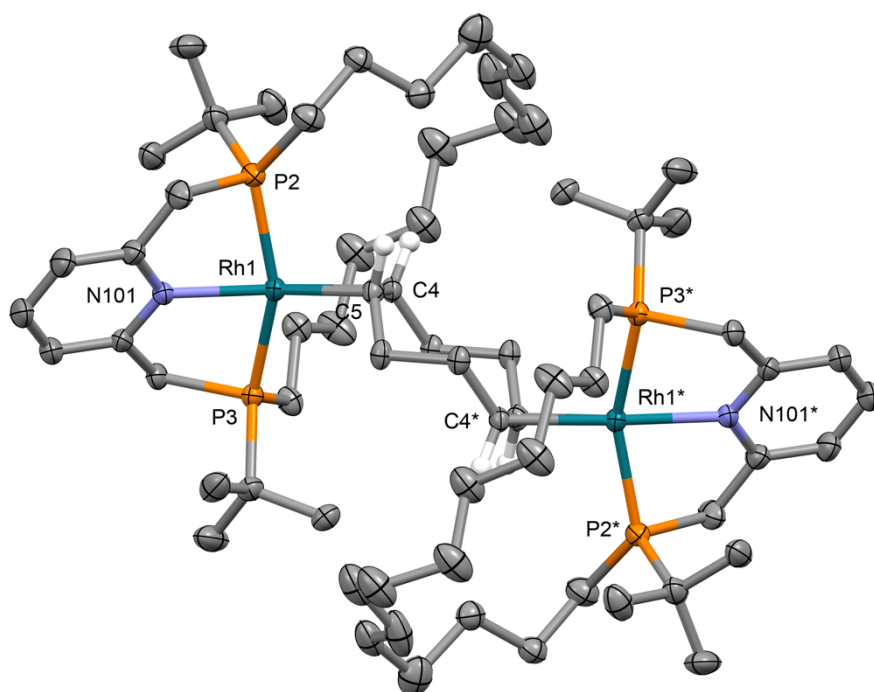

**Figure S11.** Solid-state structure of **1a''**: thermal ellipsoids drawn at 30% probability, minor disordered component (part of methylene chain), anions, solvent, and most hydrogen atoms omitted. Starred atoms are generated by the symmetry operation:  $1-x, -y, -z$ . Selected bond lengths ( $\text{\AA}$ ) and angles (deg): Rh1-P2, 2.2770(12); Rh1-P3, 2.3562(11); Rh1-N101, 2.113(4); P2-Rh1-P3, 155.58(4); Rh1-Cnt(C4,C5), 2.052(3); C4-C5, 1.391(6); N101-Rh1-Cnt(C4,C5), 160.5(2); Cnt = centroid.

#### 4.4. Reaction between *cis*-PNP-14 and [Rh(COD)<sub>2</sub>][BAr<sup>F</sup><sub>4</sub>]

A solution of *cis*-PNP-14 (7.0 mg, 14.7 μmol) and [Rh(COD)<sub>2</sub>][BAr<sup>F</sup><sub>4</sub>] (17.3 mg, 14.6 μmol) in DFB (0.5 mL) within a J. Young valve NMR tube was stirred for 5 min at RT. Analysis by <sup>1</sup>H and <sup>31</sup>P NMR spectroscopy indicated formation **1b'** as the major (>95%) organometallic species alongside liberation of COD into solution.

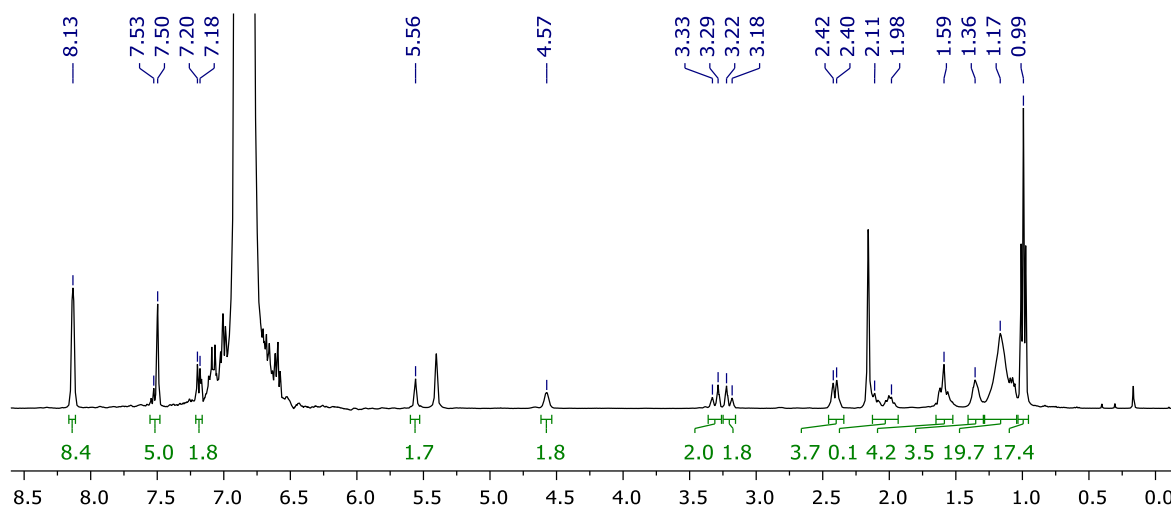

**Figure S12.** <sup>1</sup>H NMR spectrum of the reaction between *cis*-PNP-14 and [Rh(COD)<sub>2</sub>][BAr<sup>F</sup><sub>4</sub>] (DFB, 400 MHz).

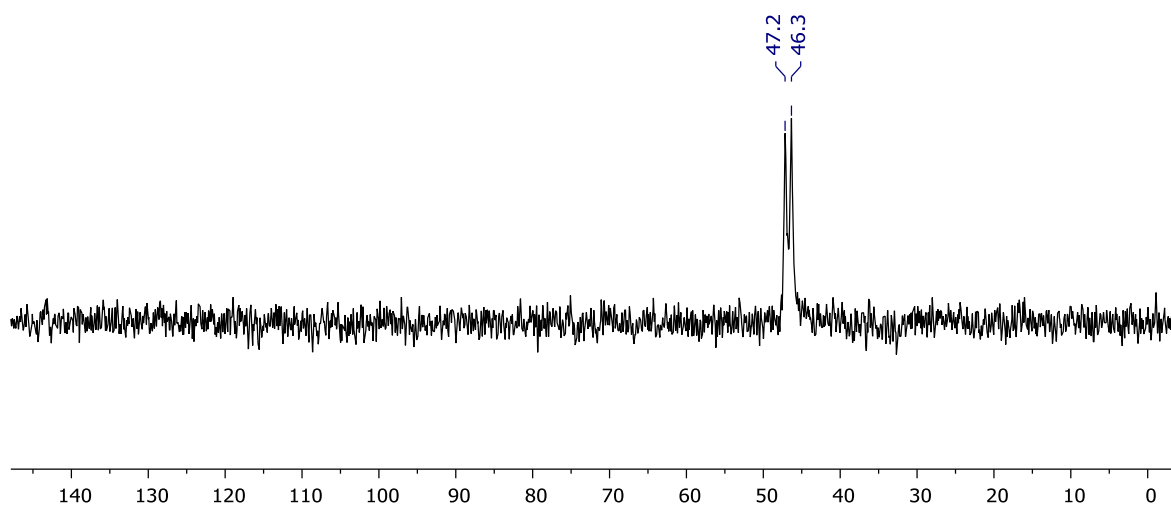

**Figure S13.** <sup>31</sup>P{<sup>1</sup>H} NMR spectrum of the reaction between *cis*-PNP-14 and [Rh(COD)<sub>2</sub>][BAr<sup>F</sup><sub>4</sub>] (DFB, 162 MHz).



#### 4.5. Characterisation of [Rh(*cis*-PNP-14)( $\eta^2$ -COD)][BAR<sup>F</sup><sub>4</sub>] (**1b'**)

A solution of *cis*-PNP-14 (7.0 mg, 14.7  $\mu$ mol) and [Rh(COD)<sub>2</sub>][BAR<sup>F</sup><sub>4</sub>] (17.3 mg, 14.6  $\mu$ mol) in DFB (0.5 mL) within a J. Young valve NMR tube was stirred for 5 min at RT and COD (18.0  $\mu$ L, 147  $\mu$ mol) added resulting in quantitative formation of **1b'**, which was characterised *in situ* by NMR spectroscopy.

<sup>1</sup>H NMR (500 MHz, DFB, selected data):  $\delta$  7.52 (t, <sup>3</sup>J<sub>HH</sub> = 7.8, 1H, py), 7.18 (d, <sup>3</sup>J<sub>HH</sub> = 7.8, 2H, py), 5.56 (t, <sup>3</sup>J<sub>HH</sub> = 3.9, 2H, CH=CH), 4.57 (br, 2H, Rh(CH=CH)), 3.30 (dvt, <sup>2</sup>J<sub>HH</sub> = 17.0, J<sub>PH</sub> = 3.8, 2H, pyCH<sub>2</sub>), 3.20 (dvt, <sup>2</sup>J<sub>HH</sub> = 17.0, J<sub>PH</sub> = 3.9, 2H, pyCH<sub>2</sub>), 0.99 (vt, J<sub>PH</sub> = 7, 18H, *t*Bu).

<sup>13</sup>C{<sup>1</sup>H} NMR (126 MHz, DFB, selected data):  $\delta$  162.3 (vt, J<sub>PC</sub> = 3, py), 139.9 (s, py), 129.6 (s, CH=CH), 121.0 (vt, J<sub>PC</sub> = 9, py), 72.7 (d, <sup>1</sup>J<sub>RhC</sub> = 12, Rh(CH=CH)), 37.3 (vt, J<sub>PC</sub> = 9, pyCH<sub>2</sub>), 32.2 (vt, J<sub>PC</sub> = 11, *t*Bu{C}), 26.8 (s, *t*Bu{CH<sub>3</sub>}).

<sup>31</sup>P{<sup>1</sup>H} NMR (162 MHz, DFB):  $\delta$  46.8 (br d, <sup>1</sup>J<sub>RhP</sub> = 134).

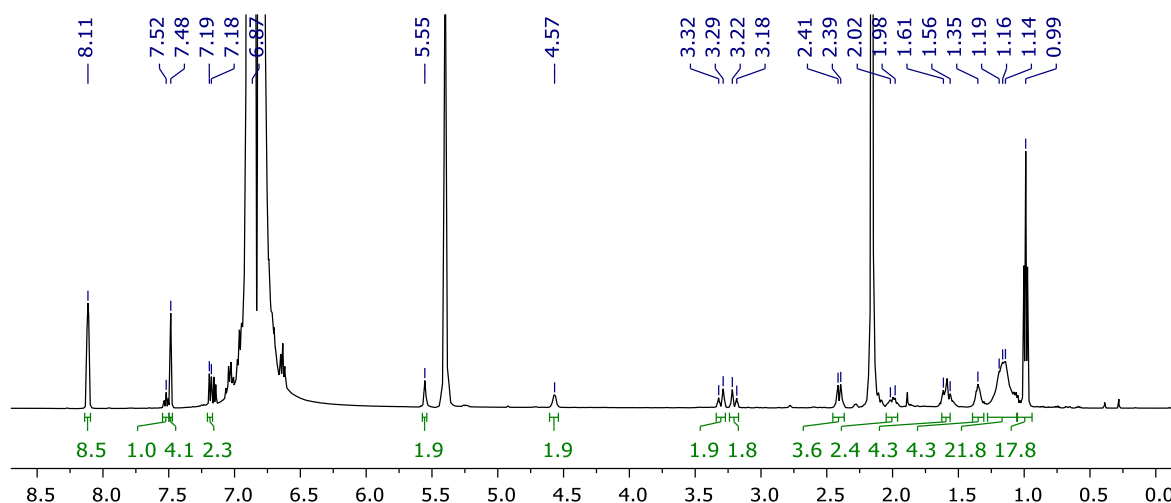

Figure S14. <sup>1</sup>H NMR spectrum of **1b'** (DFB, 500 MHz).

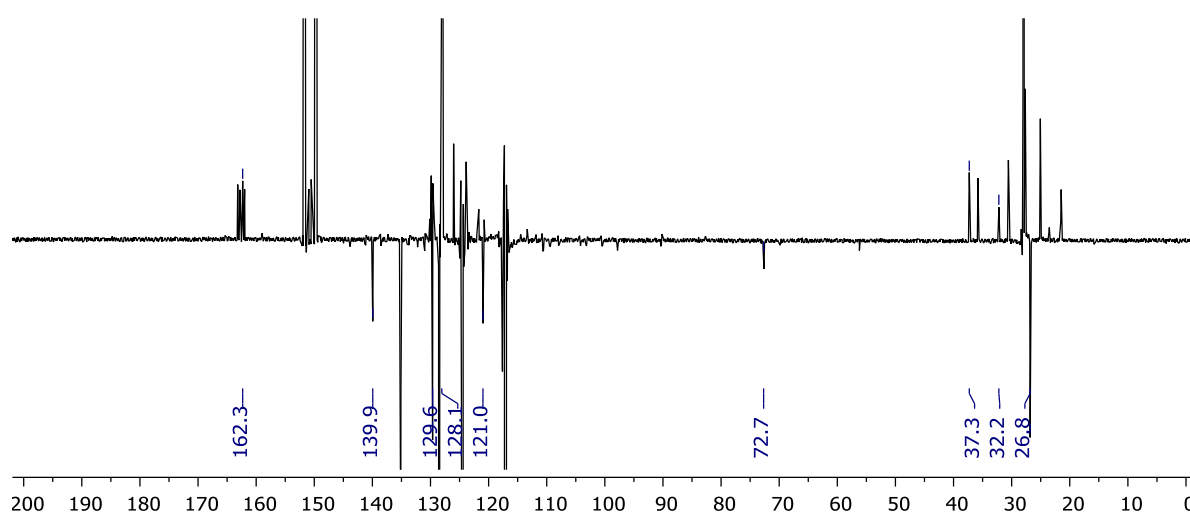

Figure S15. <sup>13</sup>C{<sup>1</sup>H} APT NMR spectrum of **1b'** (DFB, 126 MHz).

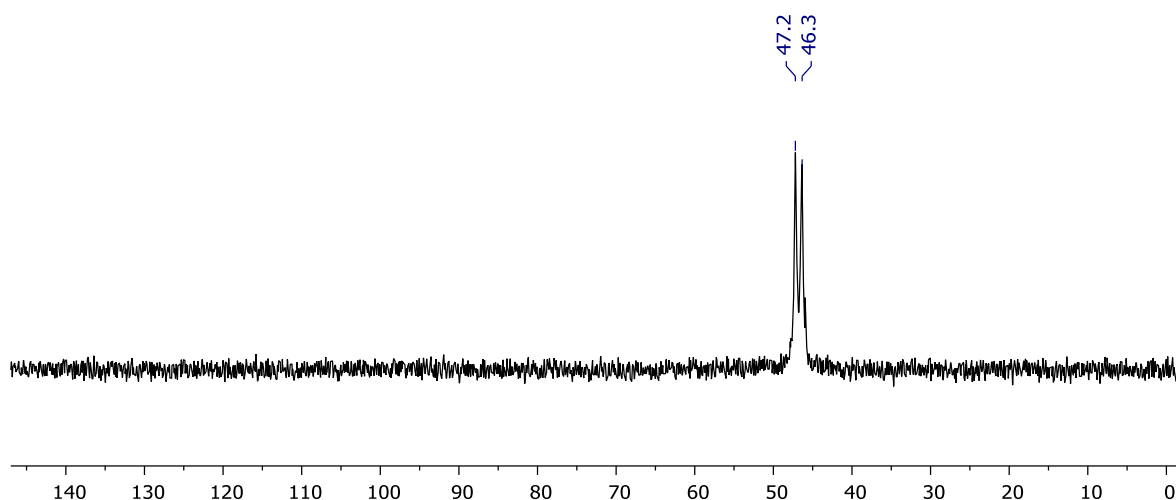

**Figure S16.**  $^{31}\text{P}\{^1\text{H}\}$  NMR spectrum of **1b'** (DFB, 162 MHz).

#### 4.6. Isolation and crystal structure of $[\{\text{Rh}(\text{cis-PNP-14})\}_2(\mu_2\text{-}\eta^2\text{:}\eta^2\text{-COD})][\text{BAR}^{\text{F}}_4]_2$ (**1b''**)

A solution of *cis*-PNP-14 (10.6 mg, 22.2  $\mu\text{mol}$ ) and  $[\text{Rh}(\text{COD})_2][\text{BAR}^{\text{F}}_4]$  (26.2 mg, 22.2  $\mu\text{mol}$ ) in DFB (0.5 mL) was stirred for 5 min at RT. Volatiles were removed in vacuo and the resulting red oil was washed with pentane (1 mL). The product was obtained as a red crystalline solid by slow diffusion of pentane into an  $\text{Et}_2\text{O}$  solution at  $-30\text{ }^\circ\text{C}$ . Yield: 28.9 mg (9.65  $\mu\text{mol}$ , 87%).

**Anal.** Calcd for  $\text{C}_{130}\text{H}_{142}\text{B}_2\text{F}_{48}\text{N}_2\text{P}_4\text{Rh}_2$  (2995.8  $\text{g mol}^{-1}$ ): C, 52.12; H, 4.78; N, 0.94. Found: C, 52.03; H, 4.50; N, 1.17.

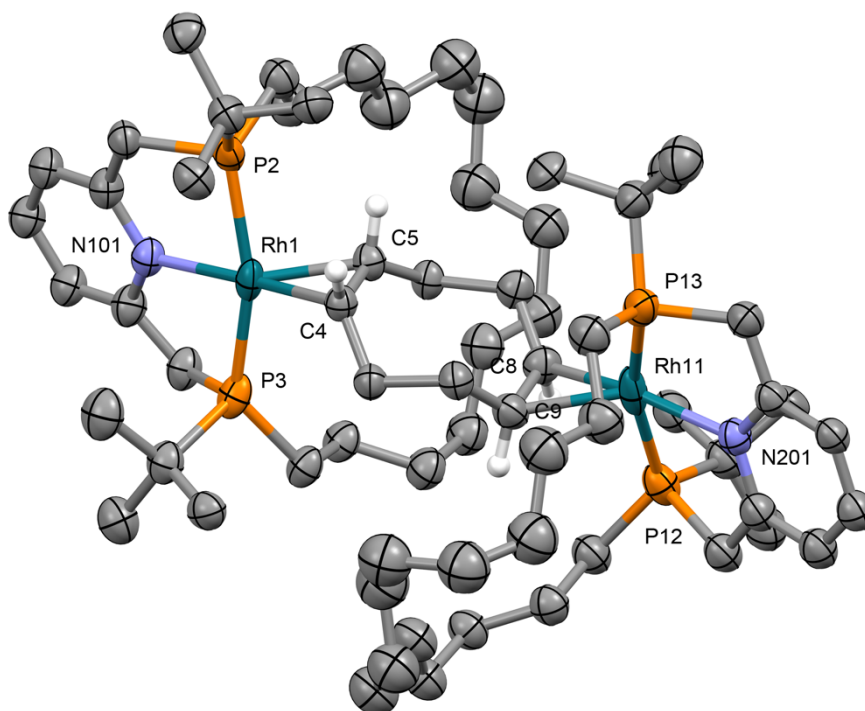

**Figure S17.** Solid-state structure of **1b''**: thermal ellipsoids drawn at 30% probability, anions and most hydrogen atoms omitted. Low quality data; for establishing connectivity only.

## 5. Synthesis and reactions of [Rh(*trans*-PNP-14)(CCH*t*Bu)][BAR<sup>F</sup><sub>4</sub>] (**2a**)

### 5.1. Reaction of **1a** with HC≡C*t*Bu

A solution of *trans*-PNP-14 (6.1 mg, 12.8 μmol) and [Rh(COD)<sub>2</sub>][BAR<sup>F</sup><sub>4</sub>] (15.0 mg, 12.7 μmol) in DFB (0.5 mL) within a J. Young valve NMR tube was mixed for 5 min at RT and HC≡C*t*Bu (4.0 μL, 32.5 μmol) added forming a deep green solution. Analysis by <sup>1</sup>H and <sup>31</sup>P NMR spectroscopy indicated quantitative formation of **2a**.

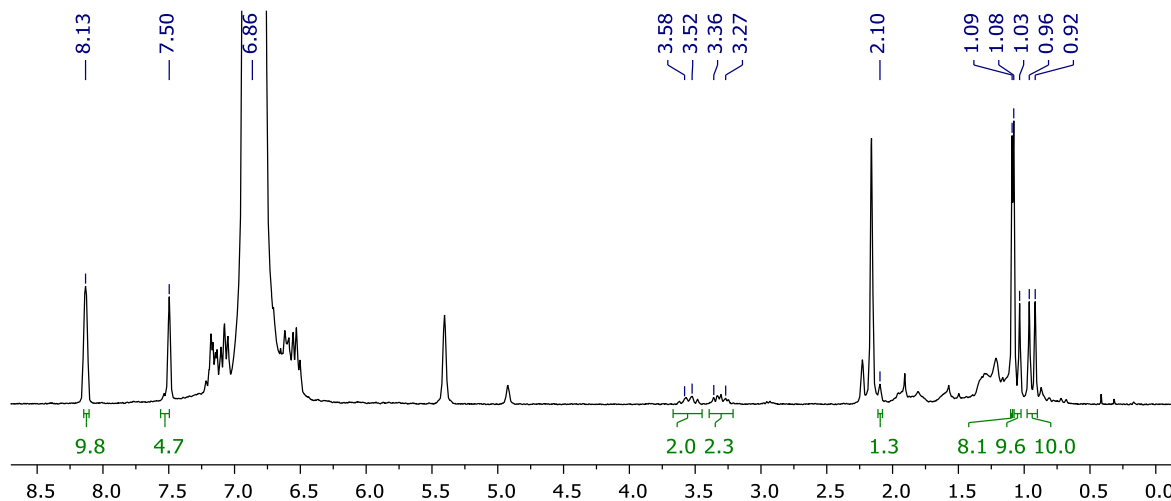

Figure S18. <sup>1</sup>H NMR spectrum of the reaction between **1a** and HC≡C*t*Bu (DFB, 300 MHz).

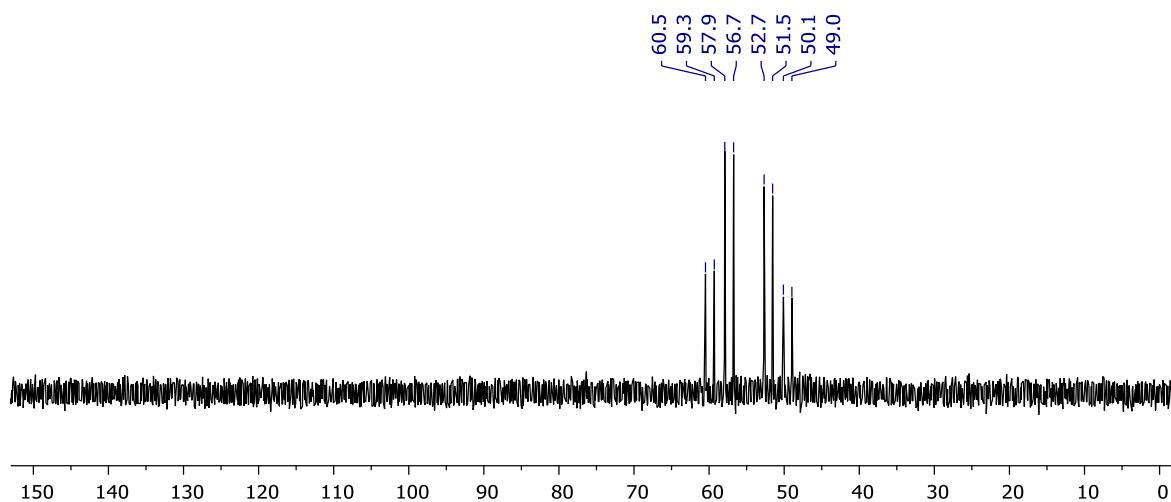

Figure S19. <sup>31</sup>P{<sup>1</sup>H} NMR spectrum of the reaction between **1a** and HC≡C*t*Bu (DFB, 121 MHz).

### 5.2. Characterisation of **2a** *in situ*

A solution of *trans*-PNP-14 (8.3 mg, 17.4 μmol) and [Rh(COD)<sub>2</sub>][BAR<sup>F</sup><sub>4</sub>] (20.6 mg, 17.4 μmol) in DFB (0.5 mL) within a J. Young valve NMR tube was mixed for 5 min and HC≡C*t*Bu (10.7 μL, 86.9 μmol) added forming a deep green solution and resulting in quantitative formation of **2a**, which characterised *in situ* by NMR spectroscopy. The presence of excess alkyne in this case increases the solution-phase stability of **2a**, facilitating characterisation.

**$^1\text{H}$  NMR** (500 MHz, DFB, selected data):  $\delta$  7.50 (obscured, py), 7.20 (d,  $^3J_{\text{HH}} = 7.8$ , 1H, py), 7.15 (d,  $^3J_{\text{HH}} = 7.8$ , 1H, py), 3.48–3.61 (m, 2H, pyCH<sub>2</sub>), 3.25–3.39 (m, 2H, pyCH<sub>2</sub>), 2.09 (s, 1H, CCHtBu), 1.07 (s, 9H CCHtBu), 1.05 (d,  $^3J_{\text{PH}} = 14.3$ , 9H, PtBu), 0.93 (d,  $^3J_{\text{PH}} = 13.7$ , 9H, PtBu).

**$^{13}\text{C}\{^1\text{H}\}$  NMR** (126 MHz, DFB, selected data):  $\delta$  323.7 (partially resolved dt,  $^1J_{\text{RhC}} = 57$ ,  $^2J_{\text{PC}}$  not resolved, CCHtBu), 163 (obscured, py), 141.3 (s, py), 121.1 (d,  $^3J_{\text{PC}} = 8$ , py), 120.8 (d,  $^3J_{\text{PC}} = 9$ , py), 120.5 (dt,  $^2J_{\text{RhC}} = 15$ ,  $^3J_{\text{PC}} = 5$ , CCHtBu), 39.2 (d,  $^1J_{\text{PC}} = 19$ , pyCH<sub>2</sub>), 36.5 (d,  $^1J_{\text{PC}} = 17$ , pyCH<sub>2</sub>), 28.3 (d,  $^2J_{\text{PC}} = 5$ , PtBu{CH<sub>3</sub>}), 26.6 (d,  $^2J_{\text{PC}} = 5$ , PtBu{CH<sub>3</sub>}).

**$^{31}\text{P}\{^1\text{H}\}$  NMR** (121 MHz, DFB):  $\delta$  58.6 (dd,  $^2J_{\text{PP}} = 312$ ,  $^1J_{\text{RhP}} = 142$ , 1P), 50.8 (dd,  $^2J_{\text{PP}} = 312$ ,  $^1J_{\text{RhP}} = 137$ , 1P).

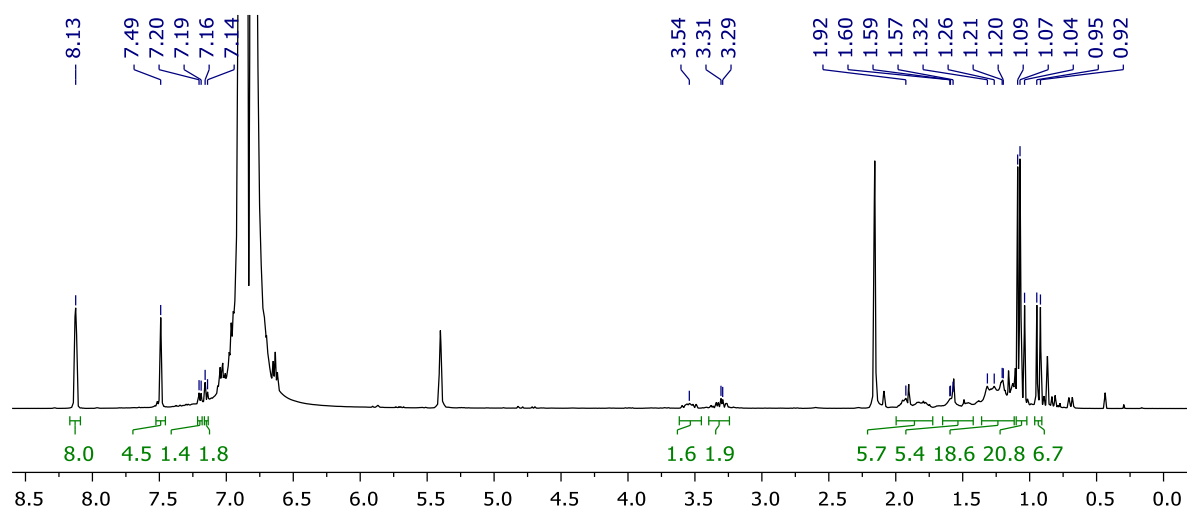

**Figure S20.**  $^1\text{H}$  NMR spectrum of **2a** (DFB, 500 MHz).

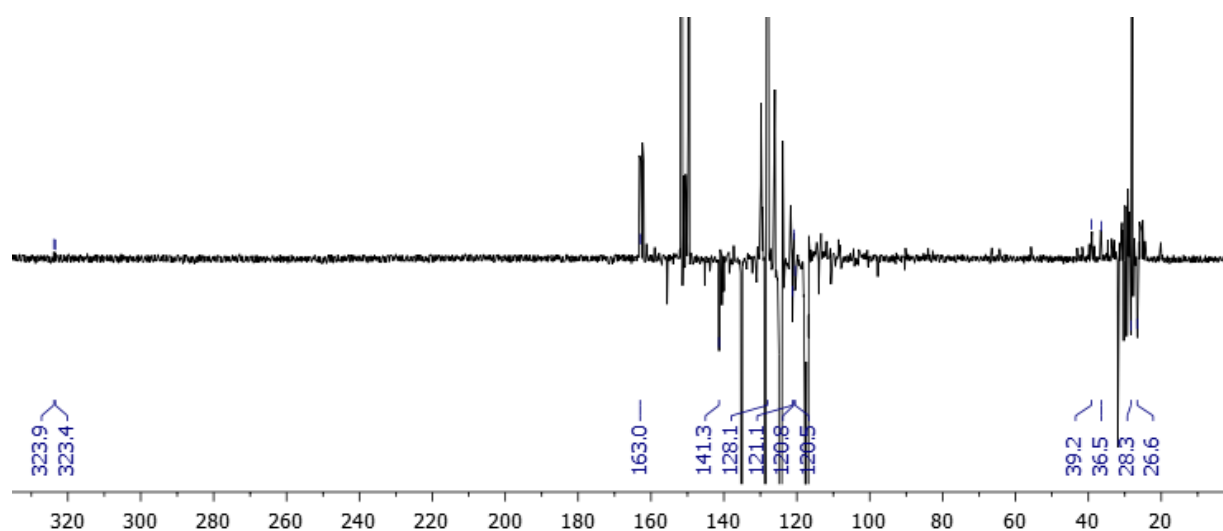

**Figure S21.**  $^{13}\text{C}\{^1\text{H}\}$  APT NMR spectrum of **2a** (DFB, 126 MHz).

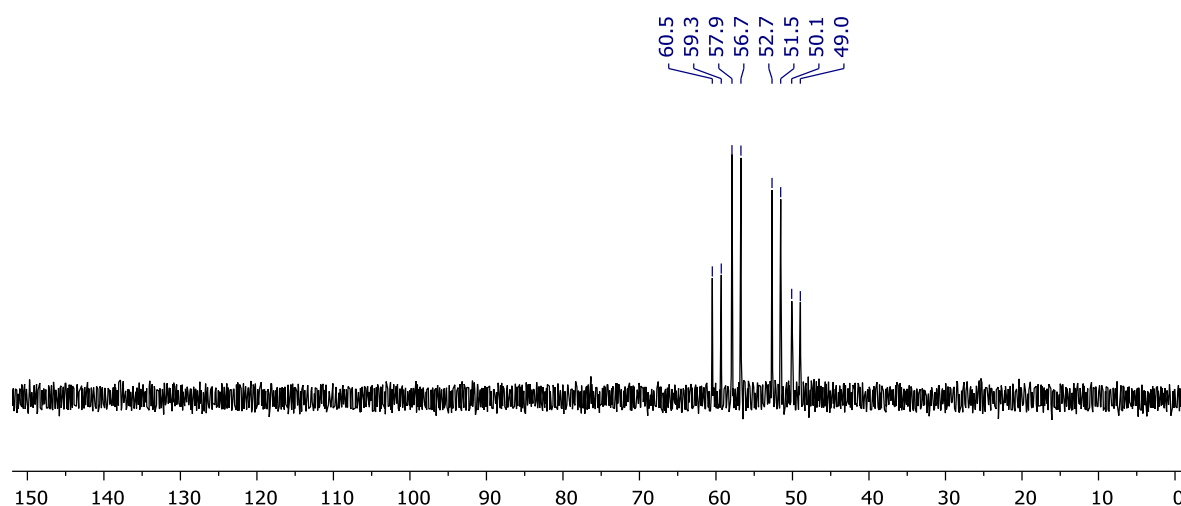

**Figure S22.**  $^{31}\text{P}\{^1\text{H}\}$  NMR spectrum of **2a** (DFB, 121 MHz).

### 5.3. Reaction of **2a** with excess $\text{HC}\equiv\text{C}t\text{Bu}$

A solution of **2a** in DFB (0.5 mL) with excess  $\text{HC}\equiv\text{C}t\text{Bu}$  (1.5 equiv.) within a J. Young valve NMR tube was prepared as described above using *trans*-PNP-14 (8.2 mg, 17.2  $\mu\text{mol}$ ),  $[\text{Rh}(\text{COD})_2][\text{BAR}^{\text{F}}_4]$  (20.3 mg, 17.2  $\mu\text{mol}$ ) and  $\text{HC}\equiv\text{C}t\text{Bu}$  (5.3  $\mu\text{L}$ , 43.0  $\mu\text{mol}$ ). The solution was heated at 80 °C for 16 h forming a yellow solution. Analysis by  $^1\text{H}$  and  $^{31}\text{P}$  NMR spectroscopy indicated quantitative formation of **3a**.

$^1\text{H}$  NMR (400 MHz, DFB, selected data):  $\delta$  7.52 (t,  $^3J_{\text{HH}} = 7.8$ , 1H, py), 7.36 (d,  $^3J_{\text{HH}} = 15.5$ , 1H,  $\text{CH}=\text{CH}t\text{Bu}$ ), 5.89 (d,  $^3J_{\text{HH}} = 15.5$ , 1H,  $\text{CH}=\text{CH}t\text{Bu}$ ), 3.33–3.43 (m, 3H,  $\text{pyCH}_2$ ), 3.24 (dd,  $^2J_{\text{HH}} = 15.9$ ,  $^2J_{\text{PH}} = 9.5$ , 1H,  $\text{pyCH}_2$ ), 1.57 (s, 9H,  $\text{C}\equiv\text{C}t\text{Bu}$ ), 1.11 (s, 9H,  $\text{CH}=\text{CH}t\text{Bu}$ ), 0.82 (d,  $^3J_{\text{PH}} = 12.5$ , 9H,  $\text{PtBu}$ ), 0.70 (d,  $^3J_{\text{HH}} = 12.4$ , 9H,  $\text{PtBu}$ ).

$^{31}\text{P}\{^1\text{H}\}$  NMR (162 MHz, DFB):  $\delta$  56.6 (dd,  $^2J_{\text{PP}} = 393$ ,  $^1J_{\text{RhP}} = 133$ , 1P), 51.0 (dd,  $^2J_{\text{PP}} = 392$ ,  $^1J_{\text{RhP}} = 129$ , 1P).

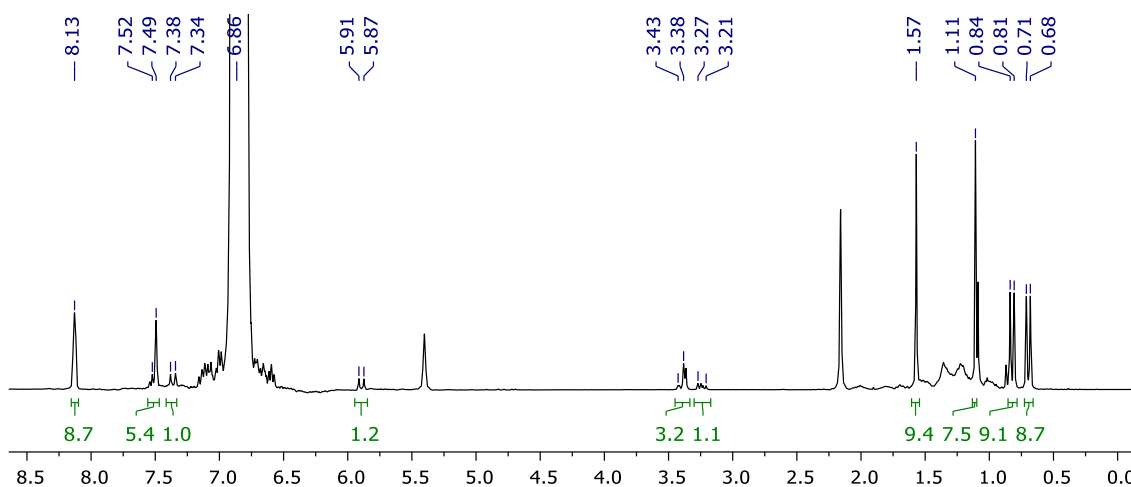

**Figure S23.**  $^1\text{H}$  NMR spectrum of the reaction between **1a** and excess  $\text{HC}\equiv\text{C}t\text{Bu}$ , after heating at 80 °C for 16 h (DFB, 400 MHz).

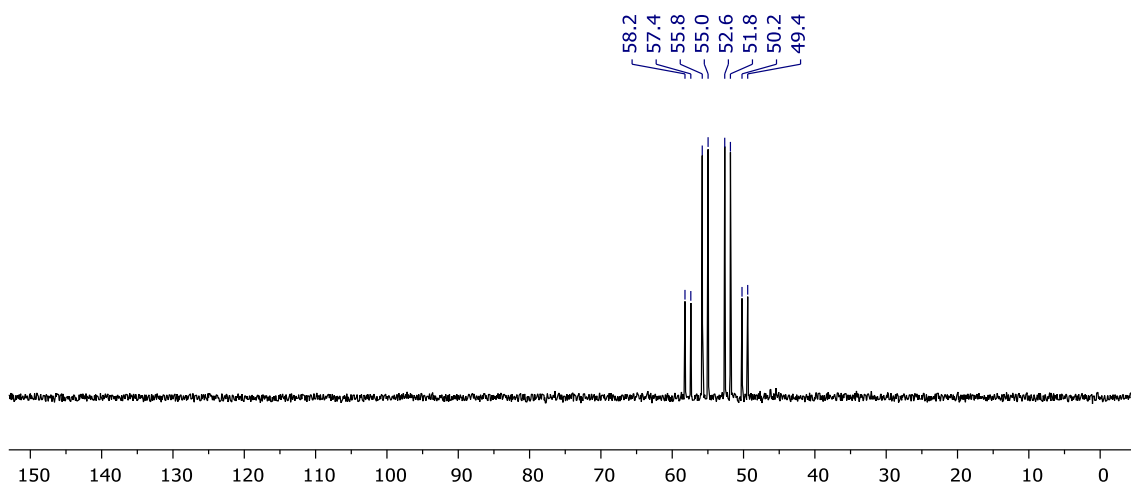

**Figure S24.**  $^{31}\text{P}\{^1\text{H}\}$  NMR spectrum of the reaction between **1a** and excess  $\text{HC}\equiv\text{CtBu}$ , after heating at  $80\text{ }^\circ\text{C}$  for 16 h (DFB, 162 MHz).

#### 5.4. Reaction of **2a** with excess $\text{DC}\equiv\text{CtBu}$

A solution of **2a** in DFB (0.5 mL) within a J. Young valve NMR tube was prepared as described above using *trans*-PNP-14 (6.6 mg, 13.8  $\mu\text{mol}$ ),  $[\text{Rh}(\text{COD})_2][\text{BAR}^{\text{F}}_4]$  (16.4 mg, 13.9  $\mu\text{mol}$ ) and  $\text{HC}\equiv\text{CtBu}$  (1.9  $\mu\text{L}$ , 15.4  $\mu\text{mol}$ ). To this solution  $\text{DC}\equiv\text{CtBu}$  (17.0  $\mu\text{L}$ , 136  $\mu\text{mol}$ ) was added and the resulting solution heated at  $80\text{ }^\circ\text{C}$  for 16 h. Volatiles were removed under vacuum, the residue washed with  $\text{SiMe}_4$ , and then analysed by  $^1\text{H}$  NMR spectroscopy and HR ESI-MS, with both indicating 83% D incorporation into the enyne core.

$^1\text{H}$  NMR (500 MHz,  $\text{CD}_2\text{Cl}_2$ , selected data):  $\delta$  7.40–7.42 (m, 0.18H,  $\text{CX}=\text{CHtBu}$ ), 5.95–6.00 (m, 0.17H,  $\text{CH}=\text{CXtBu}$ ).

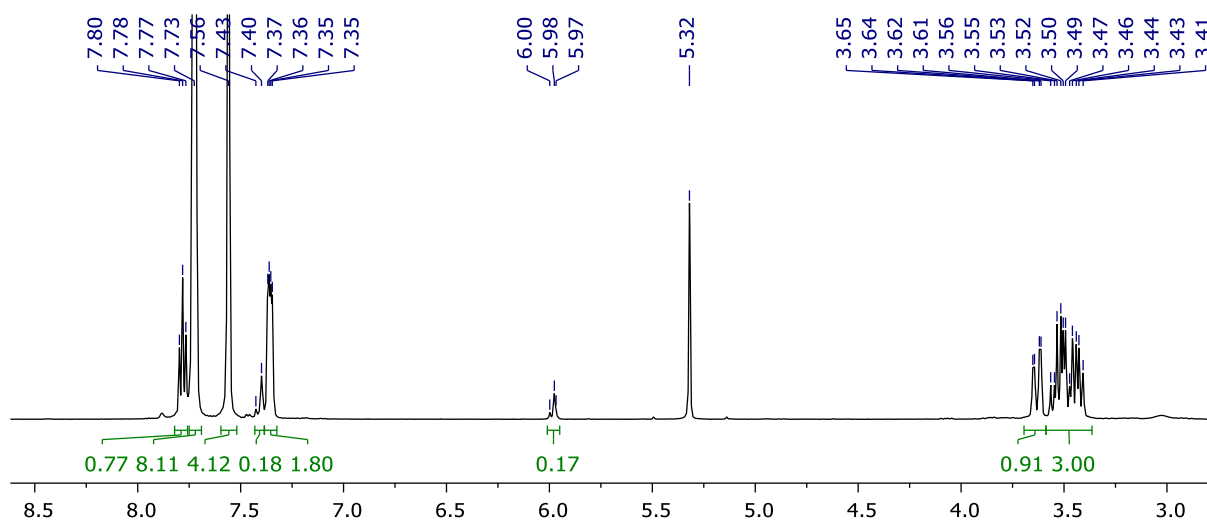

**Figure S25.**  $^1\text{H}$  NMR spectrum of the reaction between **2a** and  $\text{DC}\equiv\text{CtBu}$  ( $\text{CD}_2\text{Cl}_2$ , 500 MHz).

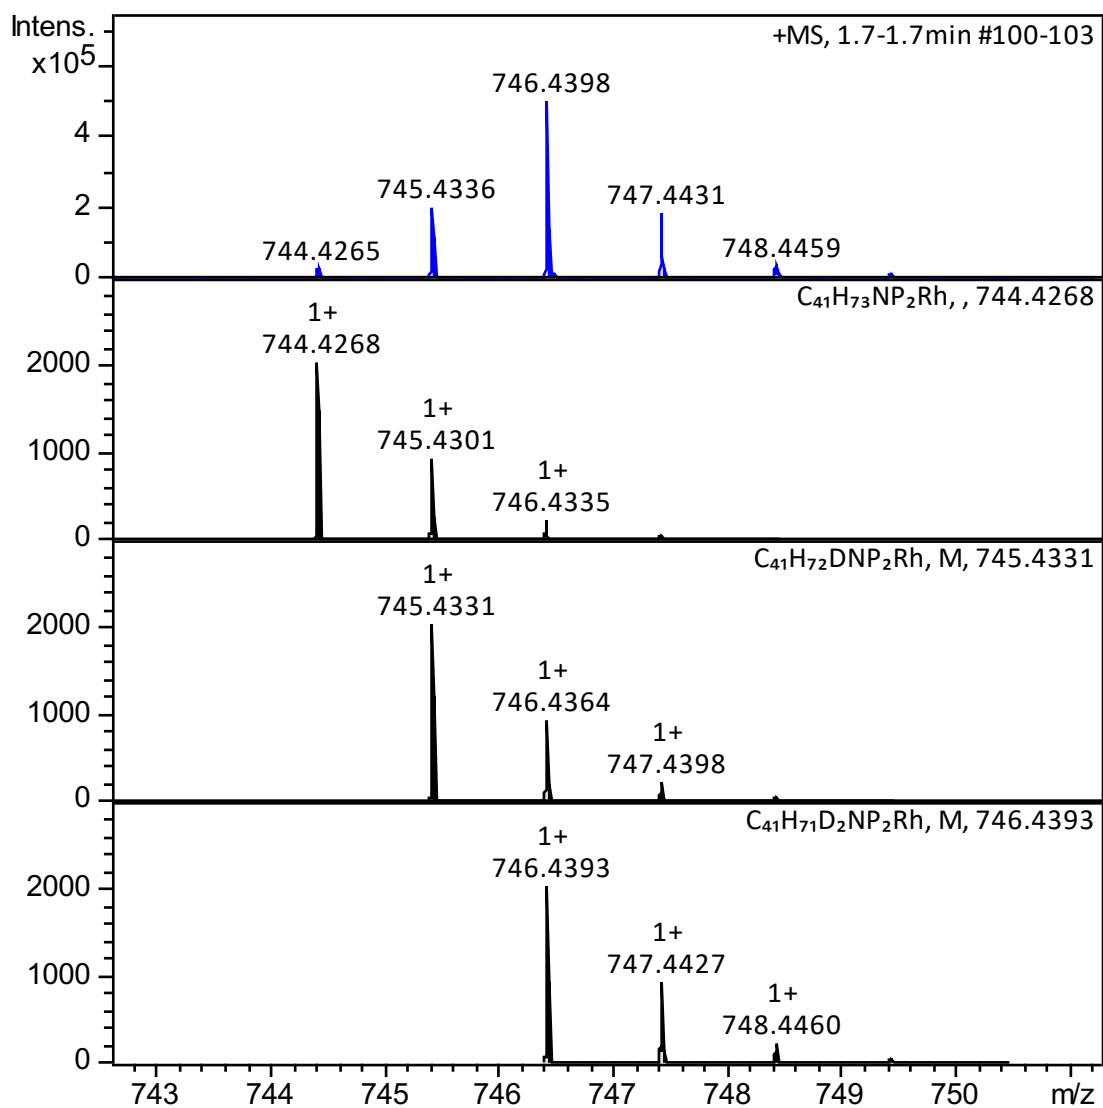

**Figure S26.** HR ESI-MS of the reaction between **2a** and DC≡CtBu. Fitting gives 3.1% [ $d_0$ -M]<sup>+</sup>, 23.5% [ $d_1$ -M]<sup>+</sup>, and 73.4% [ $d_2$ -M]<sup>+</sup>.

### 5.5. Reaction of **2a** with CO

A solution of **2a** in DFB (0.5 mL) within a J. Young valve NMR tube was prepared as described above using *trans*-PNP-14 (4.3 mg, 9.0 μmol), [Rh(COD)<sub>2</sub>][BAR<sup>F</sup><sub>4</sub>] (10.6 mg, 8.96 μmol) and HC≡CtBu (1.2 μL, 9.74 μmol). This solution was freeze-pump-thaw degassed and placed under an atmosphere of carbon monoxide (1 atm). Analysis by <sup>1</sup>H and <sup>31</sup>P NMR spectroscopy indicated quantitative formation of **4a** and liberation of free alkyne within 30 min, by comparison to literature values for the complex.<sup>2</sup>

<sup>31</sup>P{<sup>1</sup>H} NMR (162 MHz, DFB): δ 67.0 (d, <sup>1</sup>J<sub>RhP</sub> = 122).

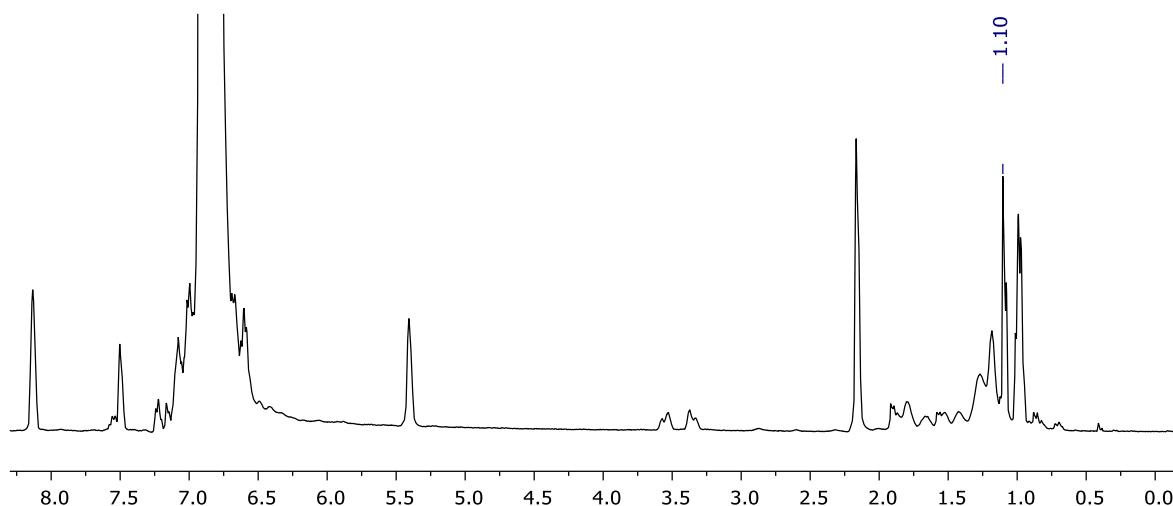

**Figure S27.**  $^1\text{H}$  NMR spectrum of the reaction between **2a** and carbon monoxide (DFB, 400 MHz).

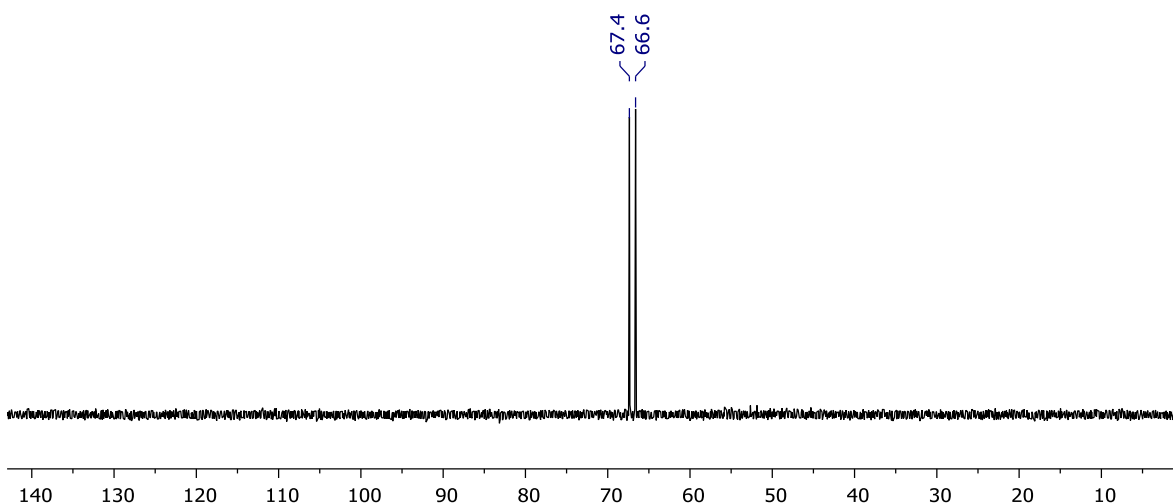

**Figure S28.**  $^{31}\text{P}\{^1\text{H}\}$  NMR spectrum of the reaction between **2a** and carbon monoxide (DFB, 162 MHz).

## 5.6. Preparation of **4a** from **1a**

A solution of *trans*-PNP-14 (8.3 mg, 17.4  $\mu\text{mol}$ ) and  $[\text{Rh}(\text{COD})_2][\text{BAr}^{\text{F}}_4]$  (20.6 mg, 17.4  $\mu\text{mol}$ ) in DFB (0.5 mL) within a J. Young valve NMR tube was mixed for 5 min at RT and then freeze-pump-thaw degassed and placed under an atmosphere of carbon monoxide (1 atm). Analysis by  $^1\text{H}$  and  $^{31}\text{P}$  NMR spectroscopy indicated quantitative formation of **4a** within 5 mins, by comparison to literature values for this complex.<sup>2</sup>

$^{31}\text{P}\{^1\text{H}\}$  NMR (121 MHz, DFB):  $\delta$  67.0 (d,  $^1J_{\text{RhP}} = 122$ ).



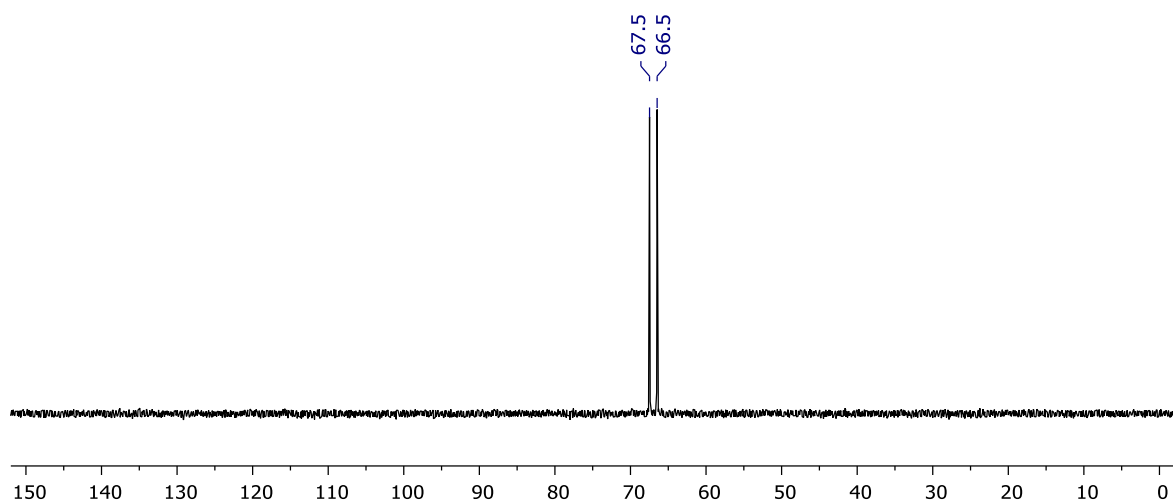

**Figure S29.**  $^{31}\text{P}\{^1\text{H}\}$  NMR spectrum of the reaction between **1a** and carbon monoxide (DFB, 121 MHz).

## 6. Synthesis, isolation and reactions of $[\text{Rh}(\text{cis-PNP-14})(\text{CCHtBu})][\text{BAR}^{\text{F}}_4]$ (**2b**)

### 6.1. Reaction of **1b** with $\text{HC}\equiv\text{CtBu}$

A solution of *cis*-PNP-14 (4.8 mg, 10.0  $\mu\text{mol}$ ) and  $[\text{Rh}(\text{COD})_2][\text{BAR}^{\text{F}}_4]$  (11.9 mg, 10.1  $\mu\text{mol}$ ) in DFB (0.5 mL) within a J. Young valve NMR tube was mixed for 5 min at RT and  $\text{HC}\equiv\text{CtBu}$  (3.0  $\mu\text{L}$ , 24.4  $\mu\text{mol}$ ) added. Analysis by  $^1\text{H}$  and  $^{31}\text{P}$  NMR spectroscopy after 42 h indicated quantitative formation of **2b**.

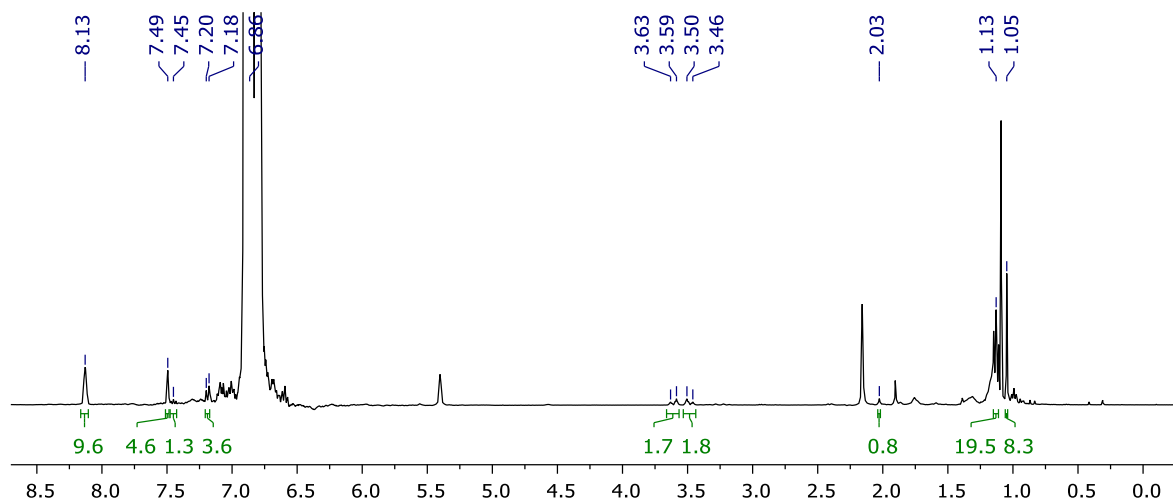

**Figure S30.**  $^1\text{H}$  NMR spectrum of the reaction between **1b** and  $\text{HC}\equiv\text{CtBu}$  (DFB, 400 MHz).

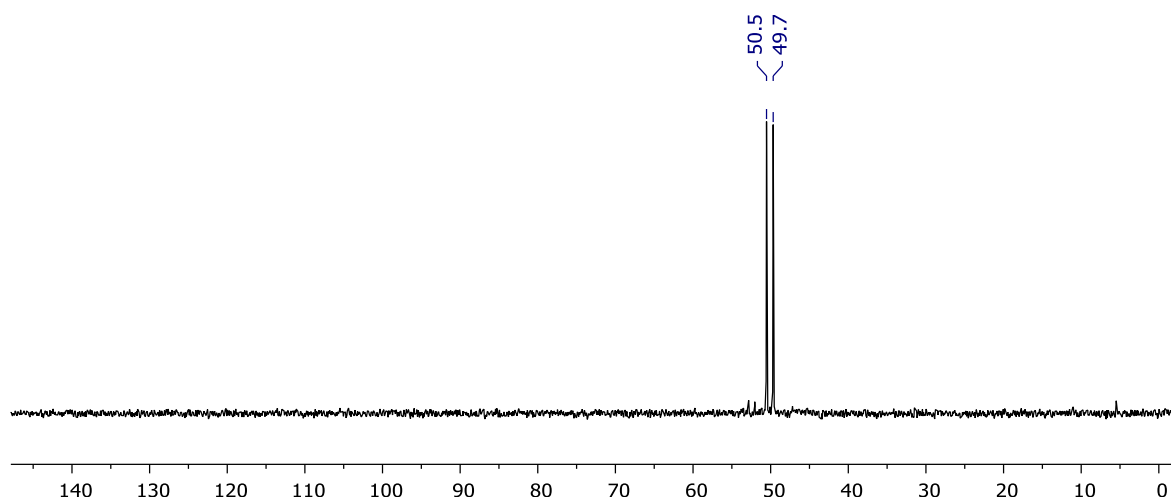

**Figure S31.**  $^{31}\text{P}\{^1\text{H}\}$  NMR spectrum of the reaction between **1b** and  $\text{HC}\equiv\text{CtBu}$  (DFB, 162 MHz).

## 6.2. Isolation and characterisation of **2b**

A solution of *cis*-PNP-14 (4.5 mg, 9.42  $\mu\text{mol}$ ) and  $[\text{Rh}(\text{COD})_2][\text{BAR}^{\text{F}}_4]$  (11.1 mg, 9.38  $\mu\text{mol}$ ) in DFB (0.5 mL) was mixed for 5 min at RT and  $\text{HC}\equiv\text{CtBu}$  (5.7  $\mu\text{L}$ , 46.2  $\mu\text{mol}$ ) added. The resulting solution was heated at 80  $^\circ\text{C}$  for 30 min affording a deep blue solution. Volatiles were removed in vacuo and the resulting blue oil was washed with  $\text{SiMe}_4$  (1 mL). Recrystallisation by slow diffusion of  $\text{SiMe}_4$  into an  $\text{Et}_2\text{O}$  solution at 4  $^\circ\text{C}$  afforded the product was a dark purple crystalline solid. Yield: 12.9 mg (8.45  $\mu\text{mol}$ , 90%).

**$^1\text{H}$  NMR** (500 MHz,  $\text{CD}_2\text{Cl}_2$ ):  $\delta$  7.70–7.77 (m, 9H, py +  $\text{Ar}^{\text{F}}$ ), 7.56 (br, 4H,  $\text{Ar}^{\text{F}}$ ), 7.40 (d,  $^3J_{\text{HH}} = 7.8$ , 2H, py), 3.77 (dvt,  $^2J_{\text{HH}} = 18.1$ ,  $J_{\text{PH}} = 4.0$ , 2H,  $\text{pyCH}_2$ ), 3.67 (dvt,  $^2J_{\text{HH}} = 18.1$ ,  $J_{\text{PH}} = 4.2$ , 2H,  $\text{pyCH}_2$ ), 2.18 (s, 1H,  $\text{CCHtBu}$ ), 1.73–2.07 (m, 6H,  $\text{CH}_2$ ), 1.03–1.57 (m, 22H,  $\text{CH}_2$ ), 1.27 (vt,  $J_{\text{PH}} = 8$ , 18H,  $\text{PtBu}$ ), 1.13 (s, 9H,  $\text{CCHtBu}$ ).

**$^1\text{H}$  NMR** (500 MHz, DFB, selected data):  $\delta$  7.45 (t,  $^3J_{\text{HH}} = 7.8$ , 1H, py), 7.19 (d,  $^3J_{\text{HH}} = 7.8$ , 2H, py), 3.60 (dvt,  $^2J_{\text{HH}} = 18.1$ ,  $J_{\text{PH}} = 4.1$ , 2H,  $\text{pyCH}_2$ ), 3.48 (dvt,  $^2J_{\text{HH}} = 18.1$ ,  $J_{\text{PH}} = 4.2$ , 2H,  $\text{pyCH}_2$ ), 2.03 (s, 1H,  $\text{CCHtBu}$ ), 1.13 (vt,  $J_{\text{PH}} = 8$ ,  $\text{PtBu}$ ), 1.05 (s,  $\text{CCHtBu}$ ).

**$^{13}\text{C}\{^1\text{H}\}$  NMR** (126 MHz,  $\text{CD}_2\text{Cl}_2$ ):  $\delta$  328.9 (dt,  $^1J_{\text{RhC}} = 53$ ,  $^2J_{\text{PC}} = 15$ ,  $\text{CCHtBu}$ ), 164.4 (vtd,  $J_{\text{PC}} = 5$ ,  $^2J_{\text{RhC}} = 1$ , py), 162.3 (q,  $^1J_{\text{CB}} = 50$ ,  $\text{Ar}^{\text{F}}$ ), 141.3 (s, py), 135.4 (s,  $\text{Ar}^{\text{F}}$ ), 129.4 (qq,  $^2J_{\text{FC}} = 32$ ,  $^3J_{\text{CB}} = 3$ ,  $\text{Ar}^{\text{F}}$ ), 125.1 (q,  $^1J_{\text{FC}} = 272$ ,  $\text{Ar}^{\text{F}}$ ), 122.1 (vt,  $J_{\text{PC}} = 5$ , py), 121.0 (dt,  $^2J_{\text{RhC}} = 15$ ,  $^3J_{\text{PC}} = 4$ ,  $\text{CCHtBu}$ ), 118.0 (sept,  $^3J_{\text{FC}} = 4$ ,  $\text{Ar}^{\text{F}}$ ), 38.3 (vt,  $J_{\text{PC}} = 9$ ,  $\text{pyCH}_2$ ), 33.0 (vtd,  $J_{\text{PC}} = 13$ ,  $^2J_{\text{RhC}} = 2$ ,  $\text{PtBu}\{\text{C}\}$ ), 32.7 (s,  $\text{CCHtBu}\{\text{CH}_3\}$ ), 31.4 (vt,  $J_{\text{PC}} = 8$ ,  $\text{CH}_2$ ), 30.0 (s,  $\text{CCHtBu}\{\text{C}\}$ ), 28.9 (s,  $\text{CH}_2$ ), 27.9 (s,  $\text{CH}_2$ ), 27.7 (s,  $\text{CH}_2$ ), 27.4 (vt,  $J_{\text{PC}} = 3$ ,  $\text{PtBu}\{\text{CH}_3\}$ ), 26.9 (s,  $\text{CH}_2$ ), 26.7 (s,  $\text{CH}_2$ ), 22.8 (vtd,  $J_{\text{PC}} = 11$ ,  $^2J_{\text{RhC}} = 3$ ,  $\text{PCH}_2$ ).

**$^{31}\text{P}\{^1\text{H}\}$  NMR** (121 MHz,  $\text{CD}_2\text{Cl}_2$ ):  $\delta$  50.7 (d,  $^1J_{\text{RhP}} = 139$ ).

**$^{31}\text{P}\{^1\text{H}\}$  NMR** (162 MHz, DFB):  $\delta$  50.1 (d,  $^1J_{\text{RhP}} = 139$ ).

**HR ESI-MS** (positive ion 4 kV): 662.3487 ( $[\text{M}]^+$ , calcd 662.3485) *m/z*.

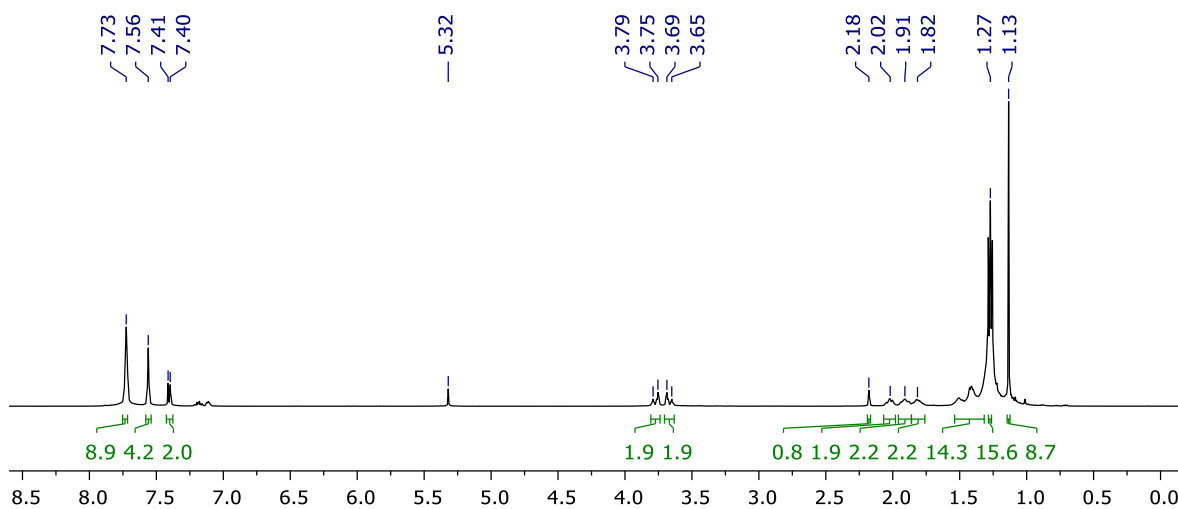

Figure S32.  $^1\text{H}$  NMR spectrum of **2b** ( $\text{CD}_2\text{Cl}_2$ , 500 MHz).

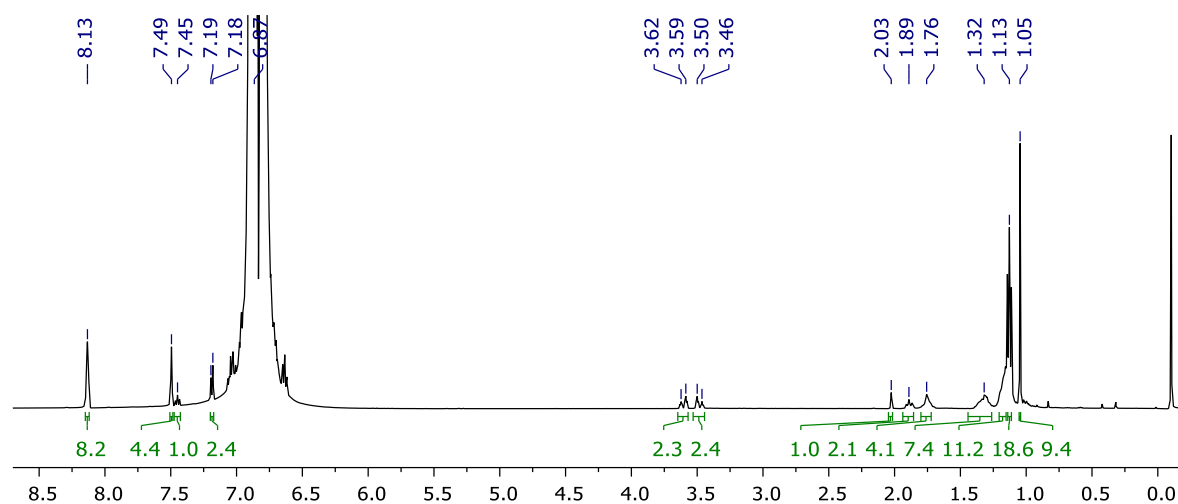

Figure S33.  $^1\text{H}$  NMR spectrum of **2b** (DFB, 500 MHz).

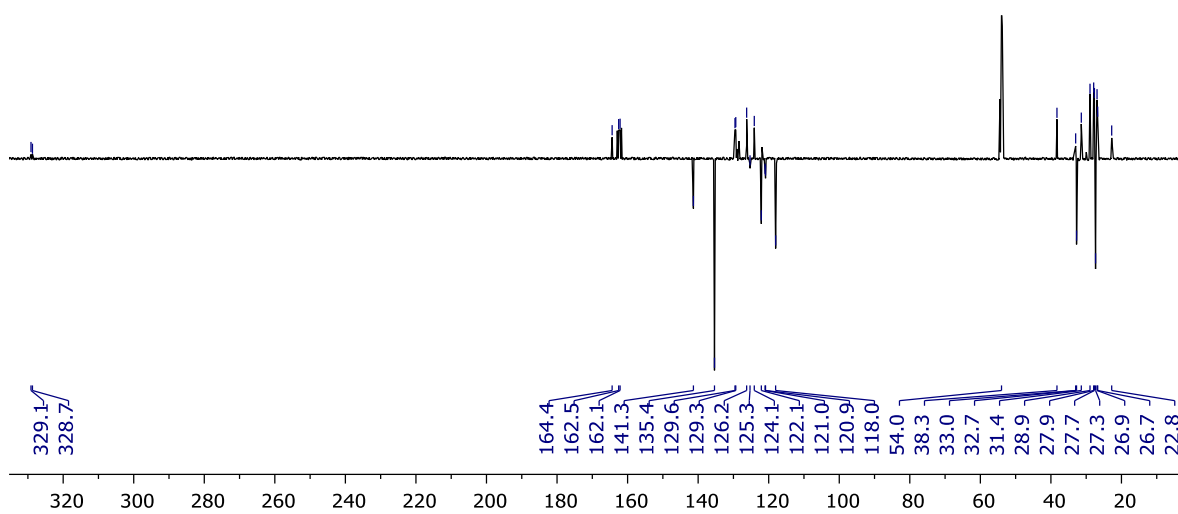

Figure S34.  $^{13}\text{C}\{^1\text{H}\}$  APT NMR spectrum of **2b** ( $\text{CD}_2\text{Cl}_2$ , 126 MHz).

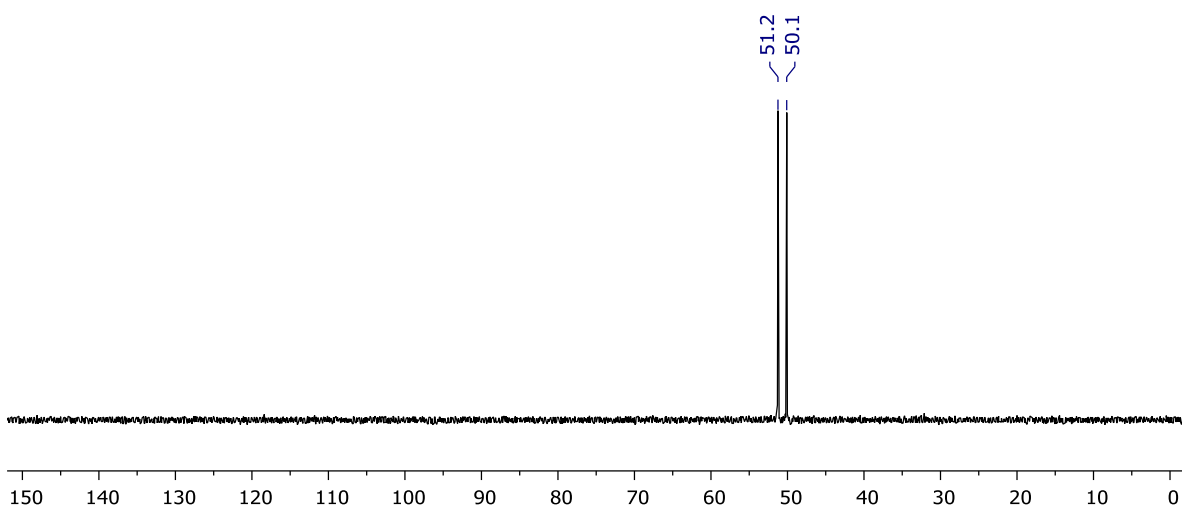

**Figure S35.**  $^{31}\text{P}\{^1\text{H}\}$  NMR spectrum of **2b** ( $\text{CD}_2\text{Cl}_2$ , 121 MHz).

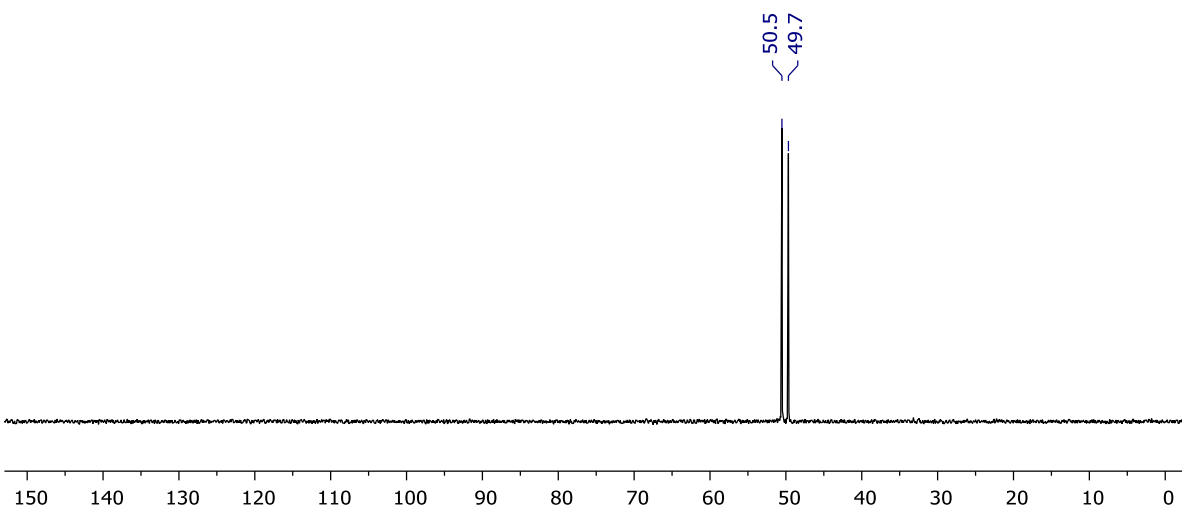

**Figure S36.**  $^{31}\text{P}\{^1\text{H}\}$  NMR spectrum of **2b** (DFB, 162 MHz).

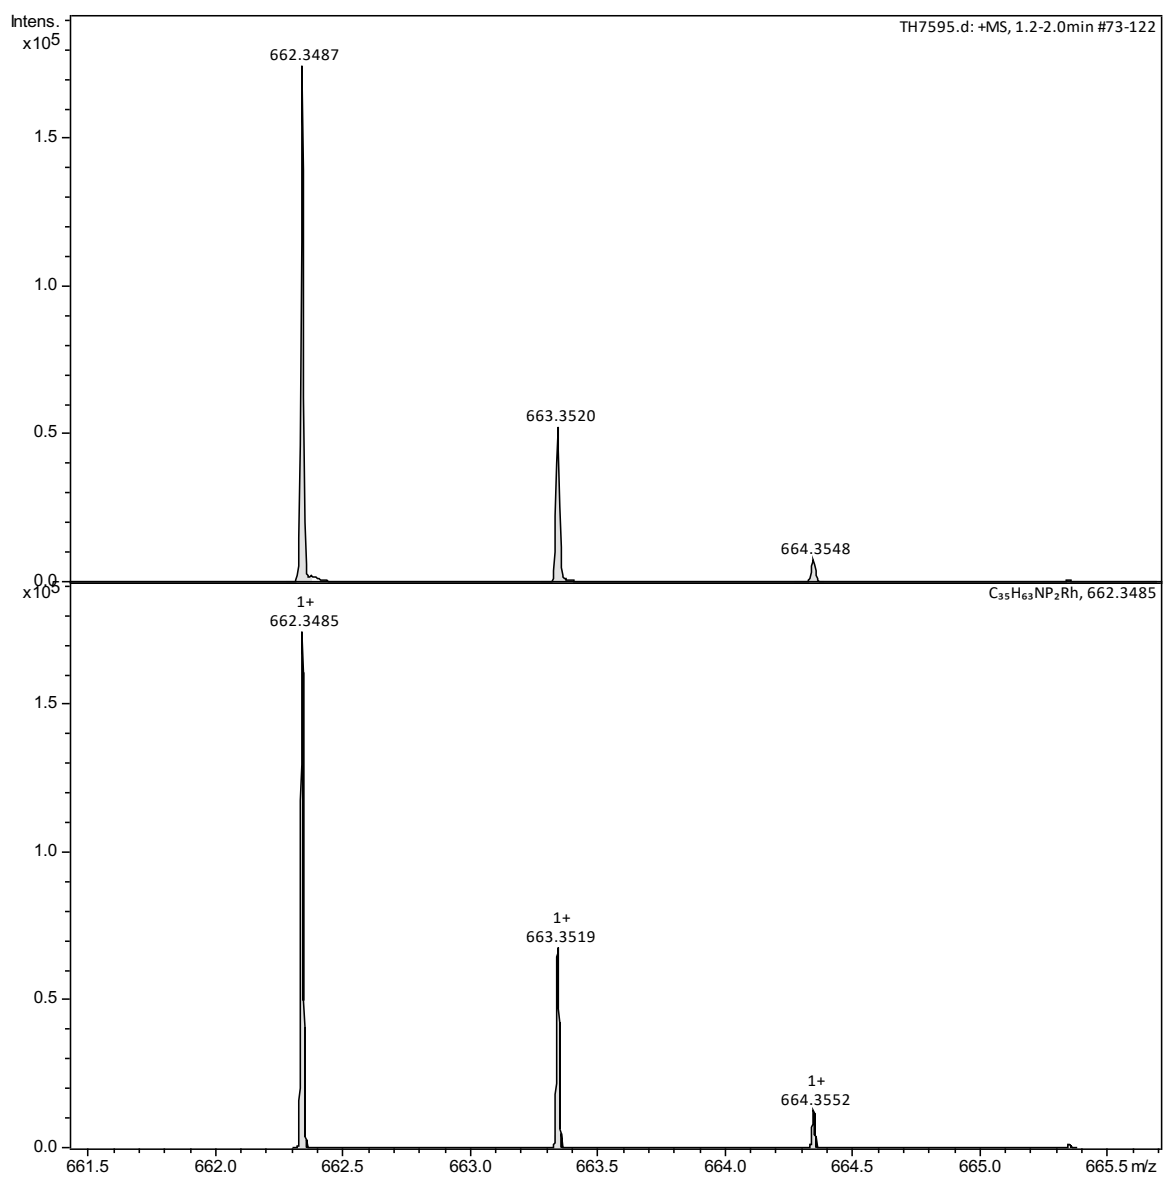

Figure S37. HR ESI-MS of 2b.

### 6.3. Reaction of **2b** with excess HC≡CtBu

To a solution of **2b** (10.1  $\mu\text{mol}$ ) in DFB (0.5 mL) with excess HC≡CtBu (1.5 equiv.) prepared as described above within a J. Young valve NMR tube was heated at 80 °C for 16 h. Analysis by  $^1\text{H}$  and  $^{31}\text{P}$  NMR spectroscopy indicated no reaction had occurred.

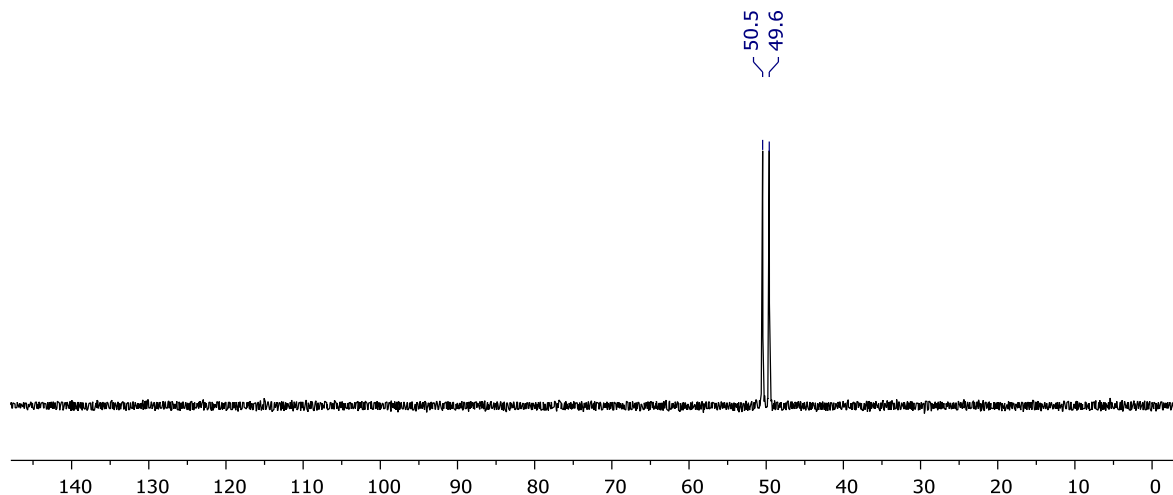

**Figure S38.**  $^{31}\text{P}\{^1\text{H}\}$  NMR spectrum of the reaction between **2b** and excess HC≡CtBu, after heating at 80 °C for 16 h (DFB, 162 MHz).

### 6.4. Reaction of **2b** with excess DC≡CtBu

To a solution of isolated **2b** (15.2 mg, 9.96  $\mu\text{mol}$ ) in DFB (355  $\mu\text{L}$ ) within a J. Young valve NMR tube was added DC≡CtBu (12.3  $\mu\text{L}$ , 98.7  $\mu\text{mol}$ ). The resulting solution heated was at 80 °C for 16 h. Volatiles were removed *in vacuo* and the residue analysed by  $^1\text{H}$  NMR spectroscopy in  $\text{CD}_2\text{Cl}_2$ , which indicated 54% D incorporation into the vinylidene. Analysis by HR ESI-MS was uninformative.

$^1\text{H}$  NMR (500 MHz,  $\text{CD}_2\text{Cl}_2$ ,  $d_1 = 5$  s, selected data):  $\delta$  2.18 (s, 0.46H, CCHtBu).

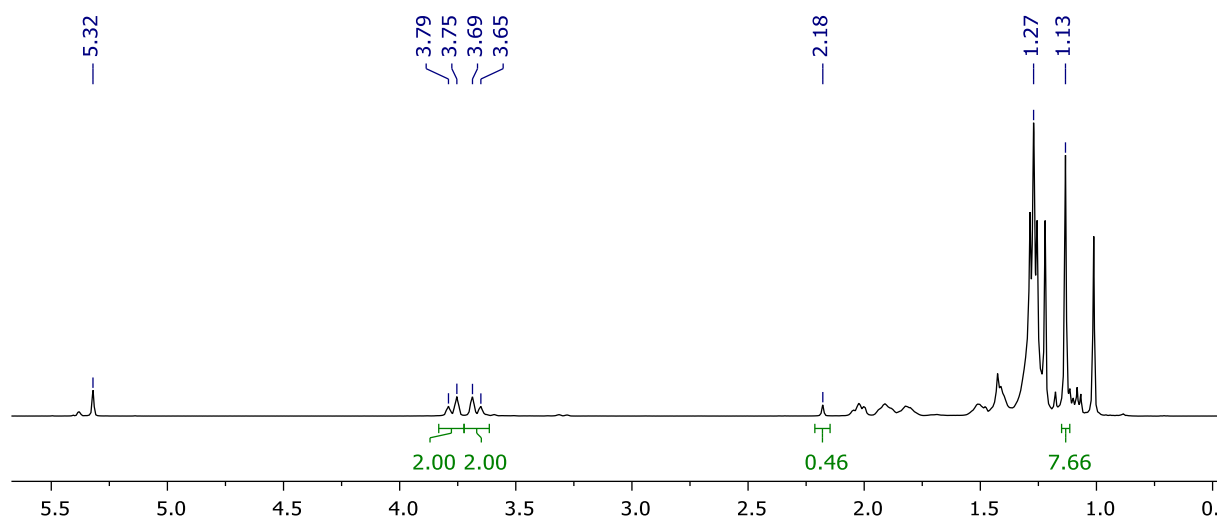

**Figure S39.**  $^1\text{H}$  NMR spectrum of the reaction of **2b** and DC≡CtBu ( $\text{CD}_2\text{Cl}_2$ , 500 MHz).

### 6.5. Reaction of **2b** with CO

A solution of isolated **2b** (13.9 mg, 9.11  $\mu\text{mol}$ ) in DFB (0.50 mL) within a J. Young valve NMR tube was freeze-pump-thaw degassed and placed under an atmosphere of carbon monoxide (1 atm). Analysis by  $^1\text{H}$  and  $^{31}\text{P}$  NMR spectroscopy indicated quantitative formation of **4b** and liberation of free alkyne within 1 h, by comparison to sample of **4b** independently prepared as described below from **1b**.

$^{31}\text{P}\{^1\text{H}\}$  NMR (162 MHz, DFB):  $\delta$  60.8 (d,  $^1J_{\text{RhP}} = 122$ ).

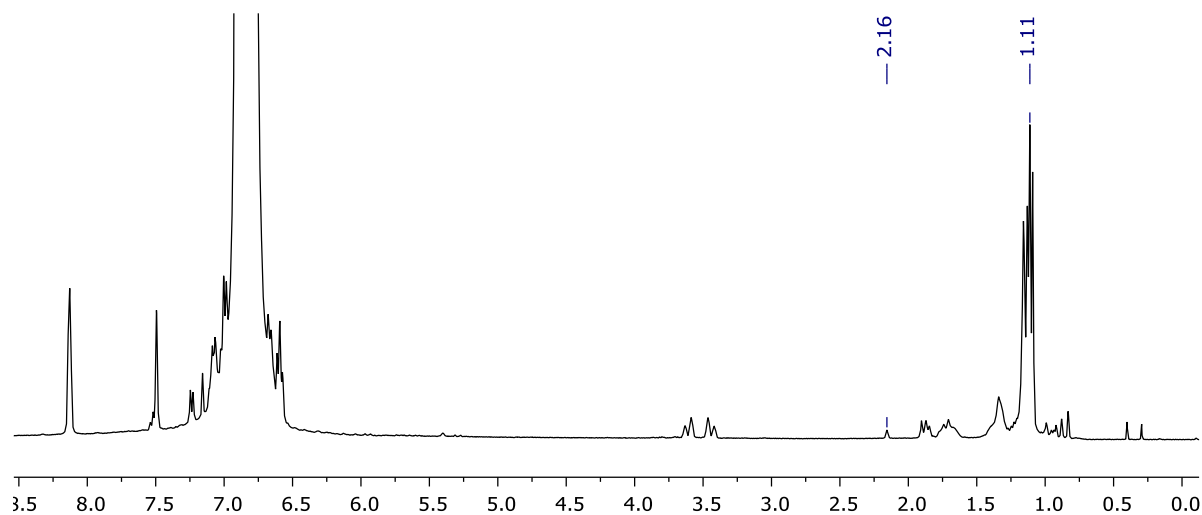

**Figure S40.**  $^1\text{H}$  NMR spectrum of the reaction between **2b** and carbon monoxide (DFB, 400 MHz).

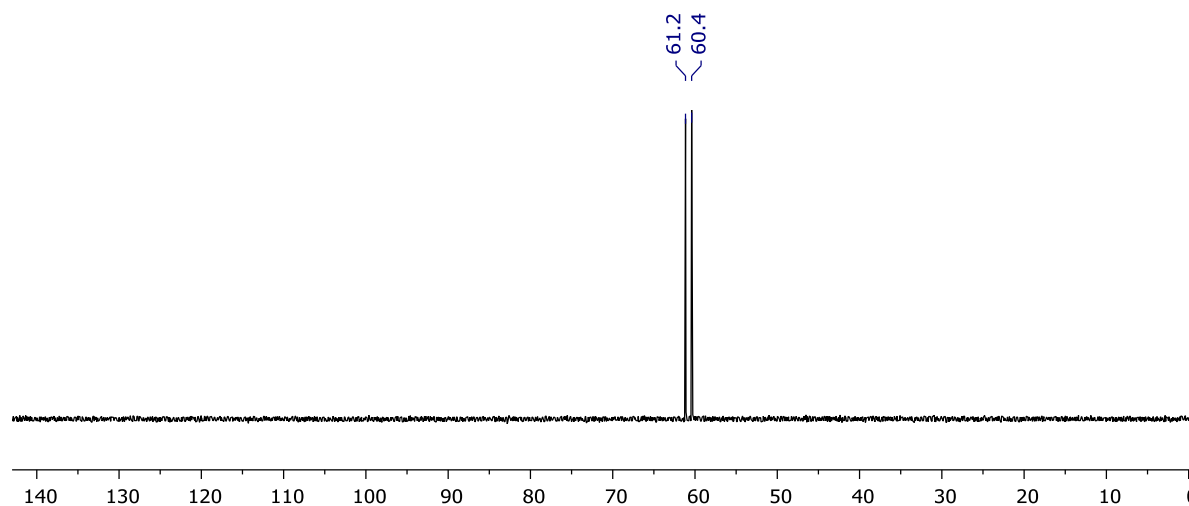

**Figure S41.**  $^{31}\text{P}\{^1\text{H}\}$  NMR spectrum of the reaction between **2b** and carbon monoxide (DFB, 162 MHz).

## 7. Preparation of [Rh(*trans*-PNP-14)(*E*-*t*BuC≡CCHCH*t*Bu)][BAr<sup>F</sup><sub>4</sub>] (3a)

A solution of **2a** (17.4 μmol) in DFB (0.5 mL) with excess HC≡C*t*Bu (4 equiv.) prepared as described above within a J. Young valve NMR tube was heated at 80 °C for 16 h forming a yellow solution. Volatiles were removed *in vacuo* and the resulting orange oil washed with SiMe<sub>4</sub> (0.5 mL). Recrystallisation by slow diffusion of SiMe<sub>4</sub> into an Et<sub>2</sub>O solution at -30 °C afforded the product was obtained as a yellow crystalline solid. Yield: 24.3 mg (15.1 μmol, 87%).

**<sup>1</sup>H NMR** (500 MHz, CD<sub>2</sub>Cl<sub>2</sub>): δ 7.78 (t, <sup>3</sup>J<sub>HH</sub> = 7.8, 1H, py), 7.70–7.74 (m, 8H, Ar<sup>F</sup>), 7.56 (br, 4H, Ar<sup>F</sup>), 7.41 (d, <sup>3</sup>J<sub>HH</sub> = 15.6, 1H, CH=CH*t*Bu), 7.36 (d, <sup>3</sup>J<sub>HH</sub> = 7.8, 1H, py), 7.35 (d, <sup>3</sup>J<sub>HH</sub> = 7.8, 1H, py), 5.98 (d, <sup>3</sup>J<sub>HH</sub> = 15.6, 1H, CH=CH*t*Bu), 3.36 (dd, <sup>2</sup>J<sub>HH</sub> = 15.9, <sup>2</sup>J<sub>PH</sub> = 4.1, 1H, pyCH<sub>2</sub>), 3.54 (dd, <sup>2</sup>J<sub>HH</sub> = 15.5, <sup>2</sup>J<sub>PH</sub> = 9.2, 1H, pyCH<sub>2</sub>), 3.48 (dd, <sup>2</sup>J<sub>HH</sub> = 15.5, <sup>2</sup>J<sub>PH</sub> = 5.7, 1H, pyCH<sub>2</sub>), 3.43 (dd, <sup>2</sup>J<sub>HH</sub> = 15.9, <sup>2</sup>J<sub>PH</sub> = 9.9, 1H, pyCH<sub>2</sub>), 2.15–2.28 (m, 1H, CH<sub>2</sub>), 1.95–2.09 (m, 1H, PCH<sub>2</sub>), 1.80–1.92 (m, 1H, PCH<sub>2</sub>), 1.70 (s, 9H, C≡C*t*Bu), 1.05–1.77 (m, 25H, CH<sub>2</sub>), 1.21 (s, 9H, CH=CH*t*Bu), 0.97 (d, <sup>3</sup>J<sub>PH</sub> = 12.7, 9H, *t*Bu), 0.84 (d, <sup>3</sup>J<sub>PH</sub> = 12.7, 9H, *t*Bu).

**<sup>13</sup>C{<sup>1</sup>H} NMR** (126 MHz, CD<sub>2</sub>Cl<sub>2</sub>): δ 163.3 (d, <sup>2</sup>J<sub>PC</sub> = 5, py), 162.6 (d, <sup>2</sup>J<sub>PC</sub> = 4, py), 162.3 (q, <sup>1</sup>J<sub>CB</sub> = 50, Ar<sup>F</sup>), 155.9 (s, CH=CH*t*Bu), 141.3 (s, py), 135.4 (s, Ar<sup>F</sup>), 129.4 (qq, <sup>2</sup>J<sub>FC</sub> = 32, <sup>3</sup>J<sub>CB</sub> = 3, Ar<sup>F</sup>), 125.2 (q, <sup>1</sup>J<sub>FC</sub> = 272, Ar<sup>F</sup>), 121.7 (d, <sup>3</sup>J<sub>PC</sub> = 7, py), 121.3 (d, <sup>3</sup>J<sub>PC</sub> = 7, py), 118.0 (sept, <sup>3</sup>J<sub>FC</sub> = 4, Ar<sup>F</sup>), 114.3 (s, CH=CH*t*Bu), 84.3 (d, <sup>1</sup>J<sub>RhC</sub> = 12, C≡C*t*Bu), 64.8 (d, <sup>1</sup>J<sub>RhC</sub> = 11, C≡C*t*Bu), 40.7 (dd, <sup>1</sup>J<sub>PC</sub> = 17, <sup>3</sup>J<sub>PC</sub> = 2, pyCH<sub>2</sub>), 39.4 (dd, <sup>1</sup>J<sub>PC</sub> = 17, <sup>3</sup>J<sub>PC</sub> = 2, pyCH<sub>2</sub>), 35.3 (s, CH=CH*t*Bu{C}), 34.1 (s, C≡C*t*Bu{C}), 33.8 (vt, <sup>1</sup>J<sub>PC</sub> = 8, *t*Bu{C}), 33.6 (br d, <sup>1</sup>J<sub>PC</sub> = 13, *t*Bu{C}), 32.6 (s, C≡C*t*Bu{CH<sub>3</sub>}), 31.6 (d, <sup>1</sup>J<sub>PC</sub> = 10, CH<sub>2</sub>), 31.0 (s, CH<sub>2</sub>), 30.9 (s, CH<sub>2</sub>), 30.8 (d, <sup>1</sup>J<sub>PC</sub> = 6, CH<sub>2</sub>), 30.52 (s, CH<sub>2</sub>), 30.49 (s, CH<sub>2</sub>), 30.4 (s, CH=CH*t*Bu{CH<sub>3</sub>}), 30.3 (s, CH<sub>2</sub>), 29.8 (s, CH<sub>2</sub>), 29.5 (s, CH<sub>2</sub>), 29.1 (s, CH<sub>2</sub>), 29.0 (d, <sup>2</sup>J<sub>PC</sub> = 5, *t*Bu{CH<sub>3</sub>}), 28.7 (d, <sup>2</sup>J<sub>PC</sub> = 5, *t*Bu{CH<sub>3</sub>}), 27.1–27.4 (m, PCH<sub>2</sub>), 26.5 (d, <sup>1</sup>J<sub>PC</sub> = 4, CH<sub>2</sub>), 25.9 (d, <sup>1</sup>J<sub>PC</sub> = 2, CH<sub>2</sub>), 25.6–25.8 (m, PCH<sub>2</sub>).

**<sup>31</sup>P{<sup>1</sup>H} NMR** (162 MHz, CD<sub>2</sub>Cl<sub>2</sub>): δ 57.6 (dd, <sup>2</sup>J<sub>PP</sub> = 392, <sup>1</sup>J<sub>RhP</sub> = 133, 1P), 51.9 (dd, <sup>2</sup>J<sub>PP</sub> = 392, <sup>1</sup>J<sub>RhP</sub> = 129, 1P).

**HR ESI-MS** (positive ion 4 kV): 744.4263, ([M]<sup>+</sup>, calcd 744.4268) *m/z*.

**Anal.** Calcd for C<sub>73</sub>H<sub>85</sub>BF<sub>24</sub>NP<sub>2</sub>Rh (1608.11 g mol<sup>-1</sup>): C, 54.52; H, 5.33; N, 0.87. Found: C, 54.38; H, 5.41; N, 0.88.



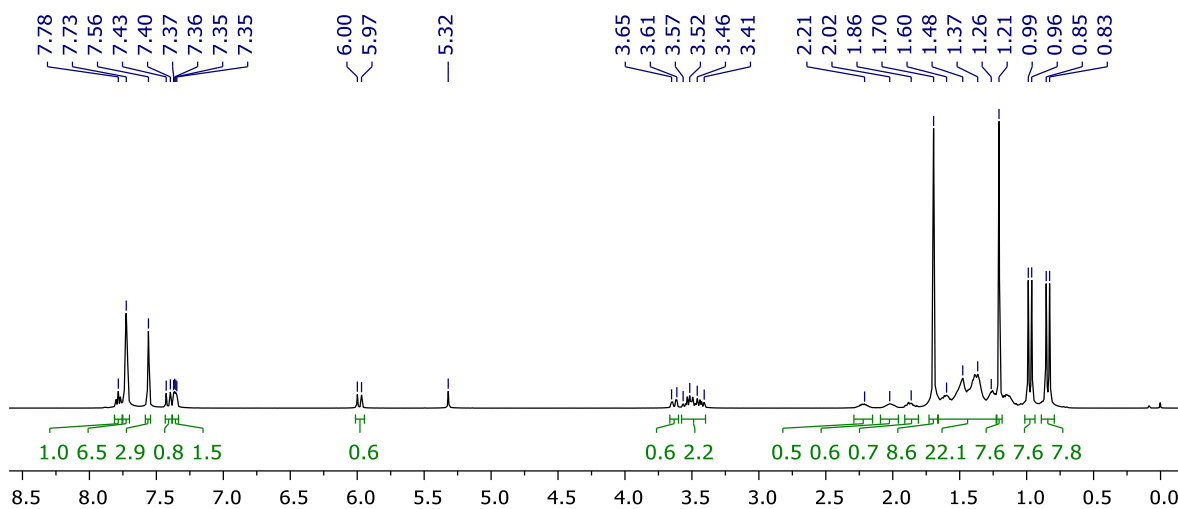

Figure S42.  $^1\text{H}$  NMR spectrum of **3a** ( $\text{CD}_2\text{Cl}_2$ , 500 MHz).

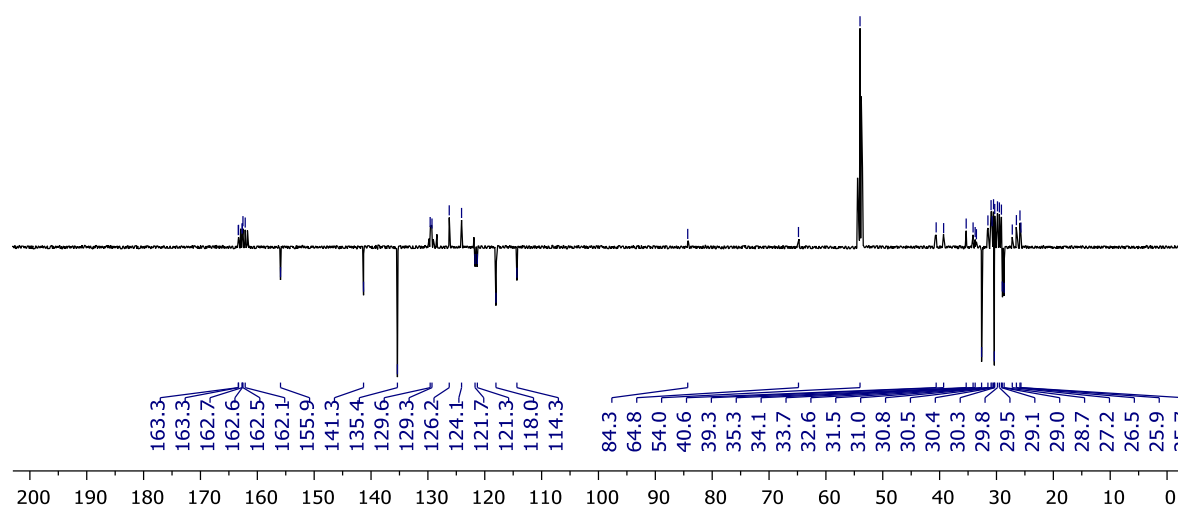

Figure S43.  $^{13}\text{C}\{^1\text{H}\}$  APT NMR spectrum of **3a** ( $\text{CD}_2\text{Cl}_2$ , 126 MHz).

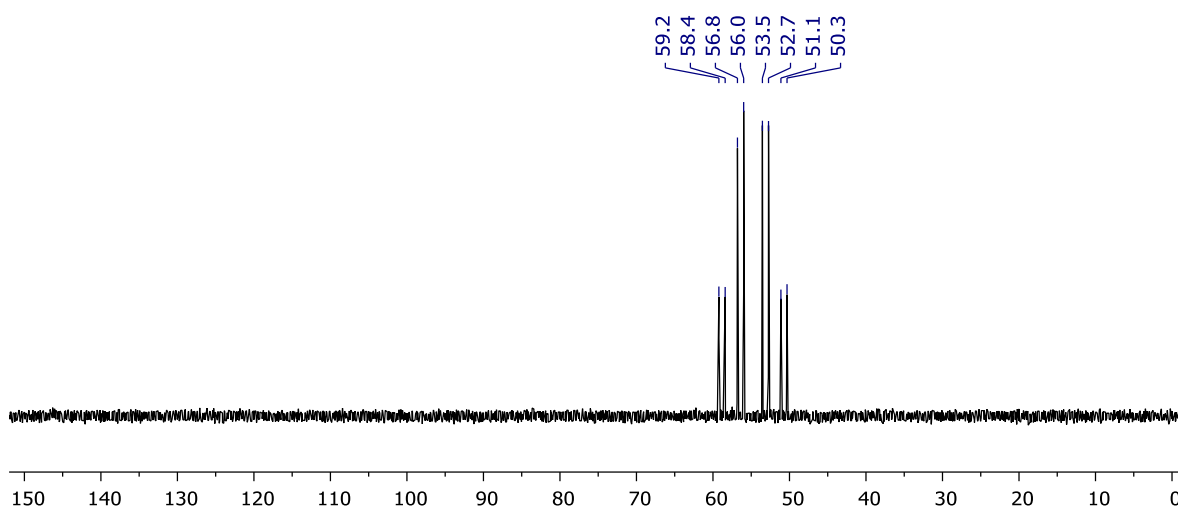

Figure S44.  $^{31}\text{P}\{^1\text{H}\}$  NMR spectrum of **3a** ( $\text{CD}_2\text{Cl}_2$ , 162 MHz).

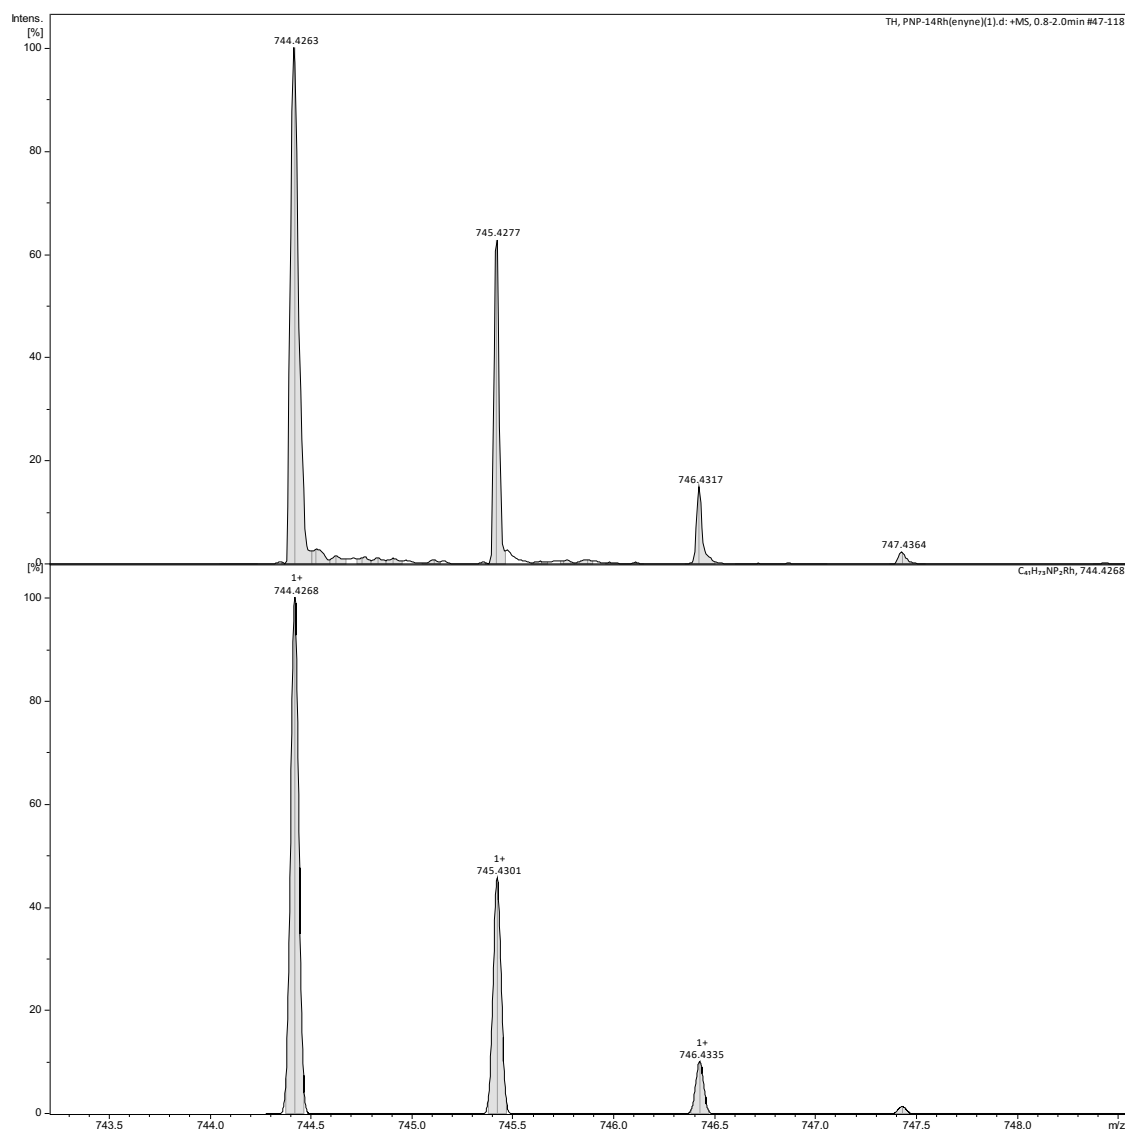

Figure S45. HR ESI-MS of **3a**.

## 8. Reaction of $\{\text{Rh}(\textit{trans}\text{-PNP-14})\}^+$ (**1a**) with $E\text{-}t\text{BuC}\equiv\text{CCHCH}t\text{Bu}$

A solution of *trans*-PNP-14 (5.8 mg, 12.1  $\mu\text{mol}$ ) and  $[\text{Rh}(\text{COD})_2][\text{BAR}^{\text{F}}_4]$  (14.3 mg, 12.1  $\mu\text{mol}$ ) in DFB (0.5 mL) within a J. Young valve NMR tube was mixed for 5 min at RT and  $E\text{-}t\text{BuC}\equiv\text{CCHCH}t\text{Bu}$  (12.5 mg, 76.1  $\mu\text{mol}$ ) added. The resulting solution was stirred for 1 h at RT and volatiles removed *in vacuo*. The resulting orange oil was washed with  $\text{SiMe}_4$  ( $3\times 0.5$  mL) and dried to afford the non-interpenetrated enyne isomer of **3a**  $[\text{Rh}(\textit{trans}\text{-PNP-14})(\textit{exo}\text{-}E\text{-}t\text{BuC}\equiv\text{CCHCH}t\text{Bu})][\text{BAR}^{\text{F}}_4]$  (**3a'**) as the exclusive organometallic product as an orange foam, which was characterised *in situ* and carried forward without further purification.

$^1\text{H NMR}$  (500 MHz, DFB, selected data):  $\delta$  7.48 (t,  $^3J_{\text{HH}} = 7.8$ , 1H, py), 7.14–7.18 (m, 2H, py), 6.07 (d,  $^3J_{\text{HH}} = 15.8$ , 1H,  $\text{CH}=\text{CH}t\text{Bu}$ ), 5.71 (d,  $^3J_{\text{HH}} = 15.8$ , 1H,  $\text{CH}=\text{CH}t\text{Bu}$ ), 3.47 (dd,  $^2J_{\text{HH}} = 17.4$ ,  $^2J_{\text{PH}} = 5.4$ , 1H,  $\text{pyCH}_2$ ), 3.39 (ddd,  $^2J_{\text{HH}} = 17.4$ ,  $^2J_{\text{PH}} = 10.7$ ,  $^4J_{\text{PH}} = 3.4$ , 1H,  $\text{pyCH}_2$ ), 3.26 (br dd,  $^2J_{\text{HH}} = 17.8$ ,

$^2J_{\text{PH}} = 10.4$ , 1H, pyCH<sub>2</sub>), 3.12 (dd,  $^2J_{\text{HH}} = 17.8$ ,  $^2J_{\text{PH}} = 8.4$ , 1H, pyCH<sub>2</sub>), 1.34 (s, 9H, C≡CtBu), 1.04 (s, 9H, CH=CHtBu), 0.88 (d,  $^3J_{\text{PH}} = 12.8$ , 9H, PtBu), 0.87 (d,  $^3J_{\text{PH}} = 13.9$ , 9H, PtBu).

$^{13}\text{C}\{^1\text{H}\}$  NMR (126 MHz, DFB, selected data):  $\delta$  164.2 (dd,  $^2J_{\text{PC}} = 8$ ,  $J_{\text{PC}} = 3$ , py), 161.4 (d,  $^2J_{\text{PC}} = 6$ , py), 153.5 (s, CH=CtBu), 139.0 (s, py), 121.1 (d,  $^3J_{\text{PC}} = 9$ , py), 120.6 (d,  $^3J_{\text{PC}} = 9$ , py), 110.4 (s, CH=CHtBu), 88.0 (d,  $^1J_{\text{RhC}} = 18$ , C≡CtBu), 67.8 (dd,  $^1J_{\text{RhC}} = 9$ ,  $^2J_{\text{PC}} = 4$ , C≡CtBu), 38.8 (br d,  $^1J_{\text{PC}} = 18$ , pyCH<sub>2</sub>), 36.5 (br d,  $^1J_{\text{PC}} = 16$ , pyCH<sub>2</sub>), 31.0 (s, C≡CtBu{CH<sub>3</sub>}), 28.9 (s, CH=CHtBu{CH<sub>3</sub>}), 28.5 (d,  $^2J_{\text{PC}} = 4$ , PtBu{CH<sub>3</sub>}), 25.1 (d,  $^2J_{\text{PC}} = 5$ , PtBu{CH<sub>3</sub>}).

$^{31}\text{P}\{^1\text{H}\}$  NMR (162 MHz, DFB):  $\delta$  44.3 (dd,  $^2J_{\text{PP}} = 408$ ,  $^1J_{\text{RhP}} = 131$ , 1P), 36.9 (dd,  $^2J_{\text{PP}} = 408$ ,  $^1J_{\text{RhP}} = 128$ , 1P).

HR ESI-MS (positive ion 4 kV): 774.4383 ( $[M]^+$ , calcd 744.4286) *m/z*.

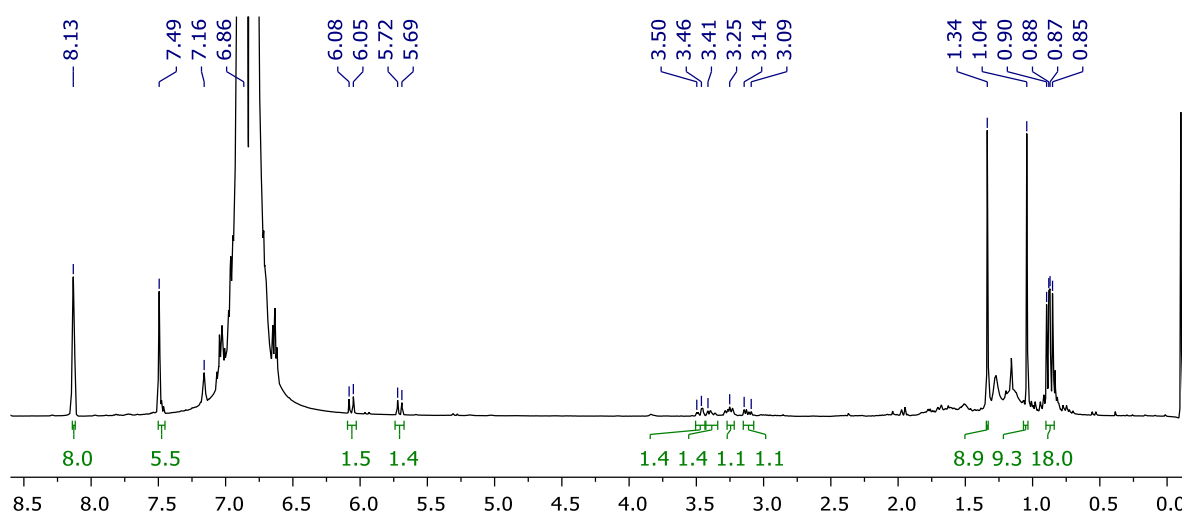

Figure S46.  $^1\text{H}$  NMR spectrum of **3a'** (DFB, 500 MHz).

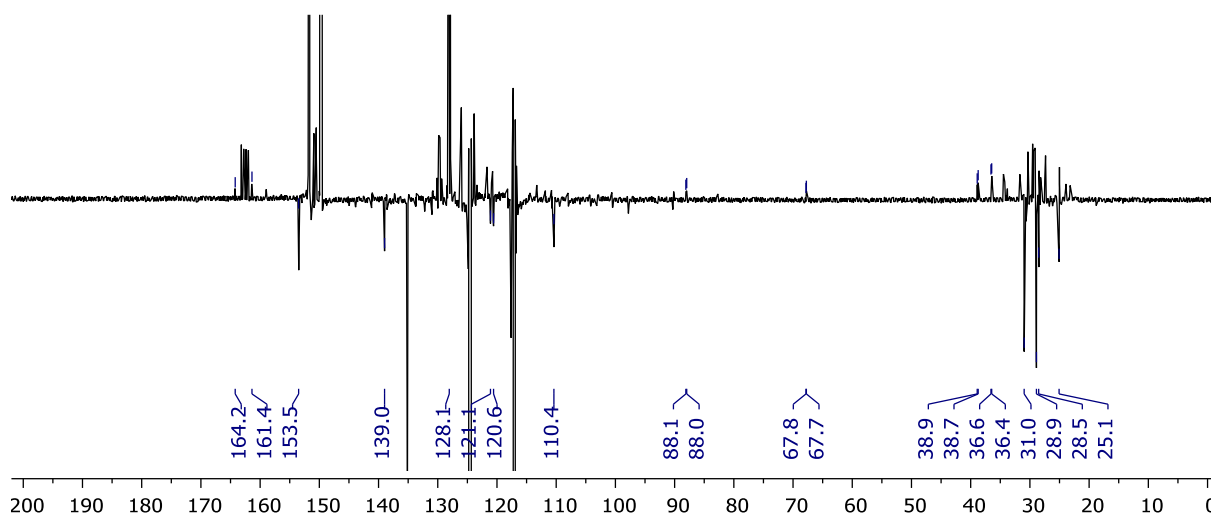

Figure S47.  $^{13}\text{C}\{^1\text{H}\}$  APT NMR spectrum of **3a'** (DFB, 126 MHz).

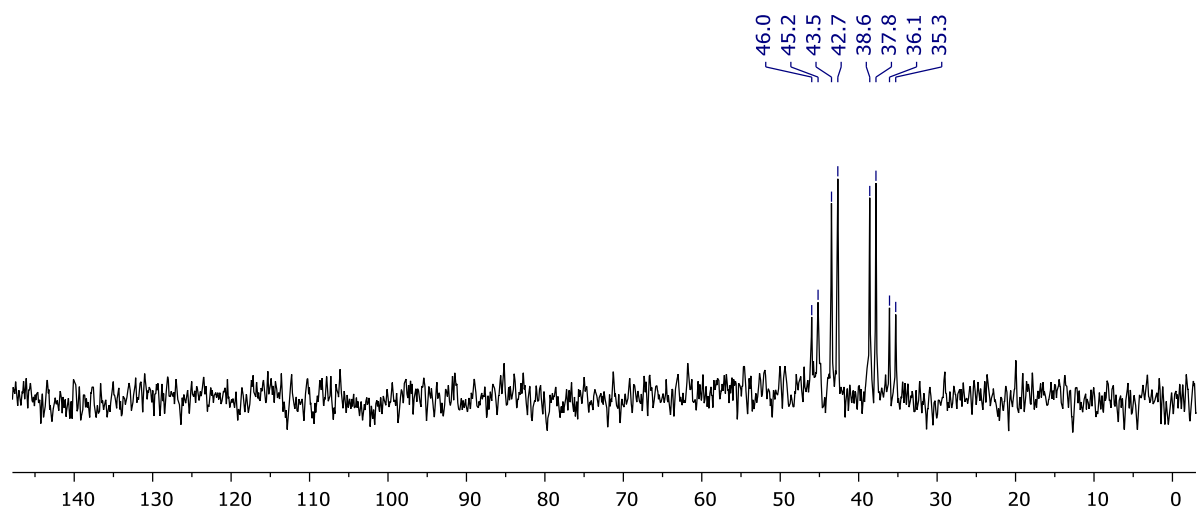

**Figure S48.**  $^{31}\text{P}\{^1\text{H}\}$  NMR spectrum of **3a'** (DFB, 162 MHz).

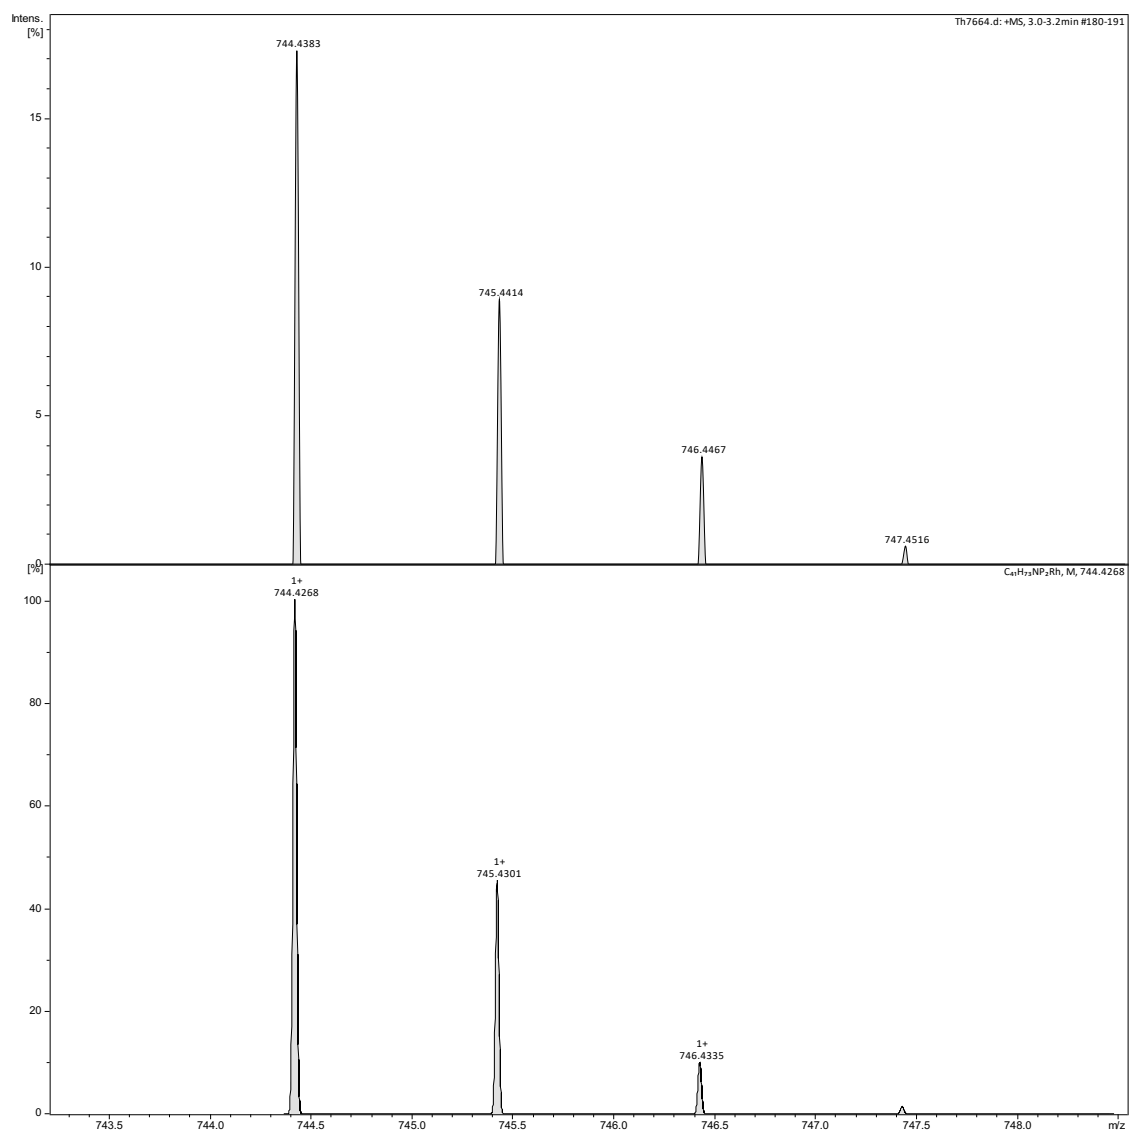

**Figure S49.** ESI-MS of **3a'**.

A solution of **3a'** (12.1  $\mu\text{mol}$ ) in DFB (0.5 mL) within a J. Young valve NMR tube was heated at 80  $^{\circ}\text{C}$  for 5 days. Analysis by  $^1\text{H}$  and  $^{31}\text{P}$  NMR spectroscopy indicated complete consumption of **3a'**, formation of a derivative where the ring has been dehydrogenated,  $[\text{Rh}(\text{trans-PNP-14}')][\text{BAR}^{\text{F}}_4]$  (**5a**), as the major organometallic product (>80%) alongside *E,E*-*t*BuCH=CHCH=CH*t*Bu ( $\delta$  5.87 (2H), 5.50 (2H), 0.92 (18H))<sup>6</sup> from transfer hydrogenation of *E-t*BuC $\equiv$ CCHCH*t*Bu. Volatiles were removed *in vacuo* and the residue extracted with hot heptane to afford the product, which was characterised *in situ*. Based on this data we cannot discriminate between formulations featuring an internal *E*- or *Z*-alkene, and it is possible the balance of the material is the alternative isomer. Indeed, a handful of single crystals were obtained by recrystallisation from heptane and analysis by X-ray diffraction indicated a mixture of *E*- and *Z*-alkene isomers. We do not think this is representative of the bulk, but nevertheless this solution further corroborates dehydrogenation of the methylene chain.

**$^1\text{H}$  NMR** (500 MHz,  $\text{CD}_2\text{Cl}_2$ , selected data):  $\delta$  7.73 (obscured, 1H, py), 7.36 (d,  $^3J_{\text{HH}} = 7.8$ , 1H, py), 7.29 (d,  $^3J_{\text{HH}} = 7.8$ , 1H, py), 5.13–5.21 (m, 1H, CH=CH), 4.31–4.40 (m, 1H, CH=CH), 3.60–3.75 (m, 3H, 3 $\times$ pyCH<sub>2</sub>), 3.34–3.43 (m, 1H, pyCH<sub>2</sub>), 1.04 (d,  $^3J_{\text{PH}} = 14.6$ , 9H, *t*Bu), 0.84 (d,  $^3J_{\text{PH}} = 13.9$ , 9H, *t*Bu).

**$^{13}\text{C}\{^1\text{H}\}$  NMR** (126 MHz,  $\text{CD}_2\text{Cl}_2$ , selected data):  $\delta$  130.8 (s, py), 121.7 (overlapping d,  $^3J_{\text{PC}} = 9$ , 2 $\times$ py), 88.3 (dd,  $^1J_{\text{RhC}} = 11$ ,  $^2J_{\text{PC}} = 4$ , CH=CH) 70.3 (d,  $^1J_{\text{RhC}} = 8$ , CH=CH), 39.5 (d,  $^1J_{\text{PC}} = 18$ , pyCH<sub>2</sub>), 36.8 (br d,  $^1J_{\text{PC}} = 15$ , pyCH<sub>2</sub>), 26.9 (d,  $^2J_{\text{PC}} = 4$ , PtBu{CH<sub>3</sub>}), 26.7 (d,  $^2J_{\text{PC}} = 5$ , PtBu{CH<sub>3</sub>}).

**$^{31}\text{P}\{^1\text{H}\}$  NMR** (162 MHz,  $\text{CD}_2\text{Cl}_2$ ):  $\delta$  89.7 (dd,  $^2J_{\text{PP}} = 301$ ,  $^1J_{\text{RhP}} = 128$ , 1P), 53.0 (dd,  $^2J_{\text{PP}} = 301$ ,  $^1J_{\text{RhP}} = 124$ , 1P).

**$^{31}\text{P}\{^1\text{H}\}$  NMR** (162 MHz, DFB):  $\delta$  90.0 (dd,  $^2J_{\text{PP}} = 300$ ,  $^1J_{\text{RhP}} = 128$ , 1P), 52.4 (dd,  $^2J_{\text{PP}} = 300$ ,  $^1J_{\text{RhP}} = 124$ , 1P).

**HR ESI-MS** (positive ion 4 kV): 578.2534 ( $[\text{M}]^+$ , calcd 578.2546) *m/z*.

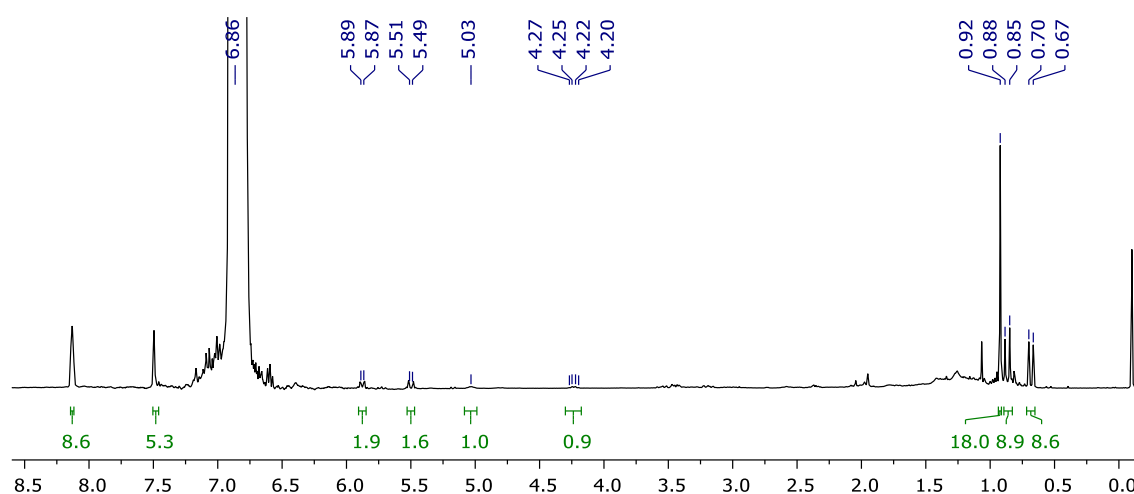

**Figure S50.**  $^1\text{H}$  NMR spectrum collected after heating **3a'** at 80  $^{\circ}\text{C}$  for 5 days (DFB, 400 MHz).

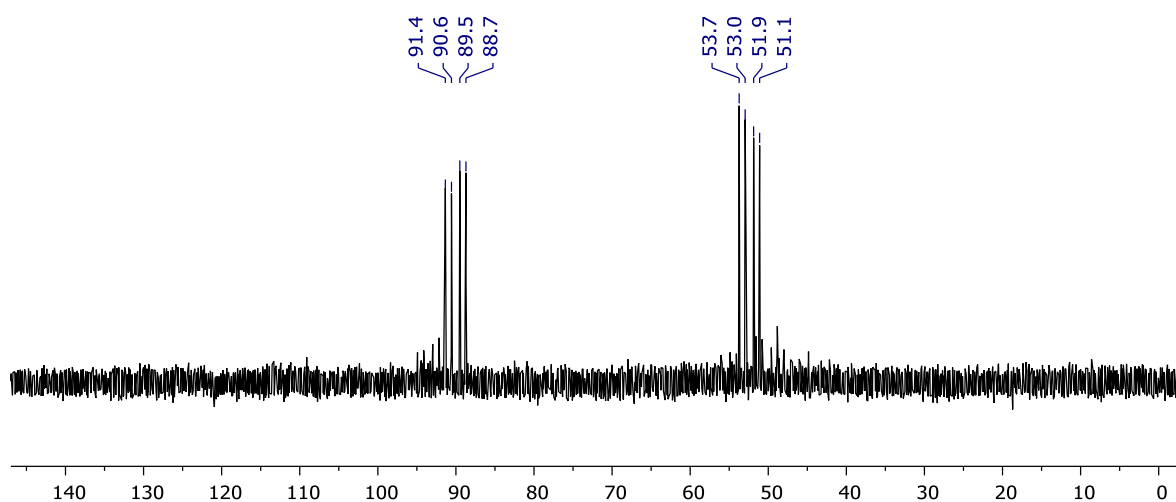

Figure S51.  $^{31}\text{P}\{^1\text{H}\}$  NMR spectrum collected after heating **3a'** at 80 °C for 5 days (DFB, 162 MHz).

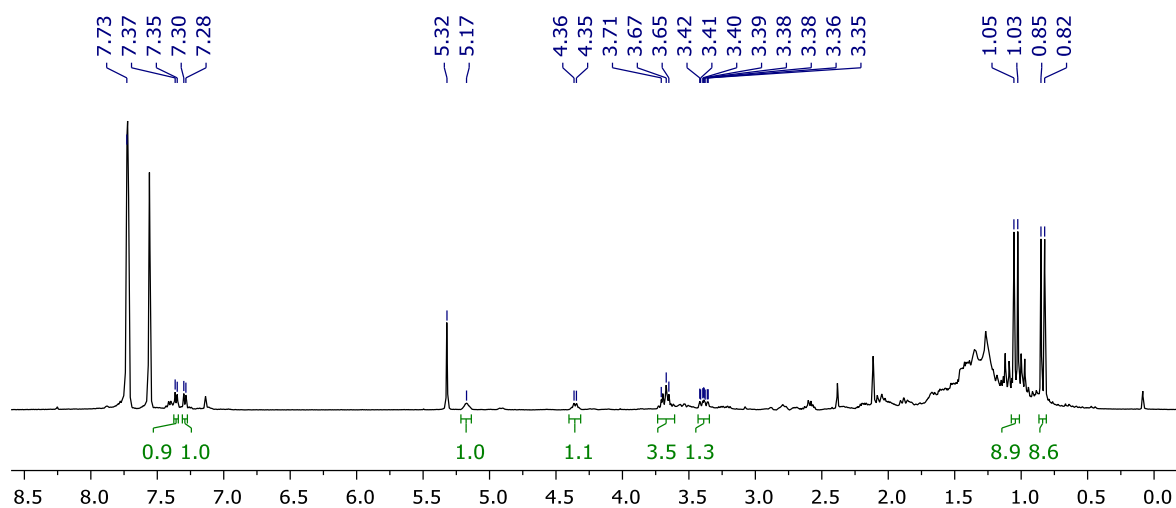

Figure S52.  $^1\text{H}$  NMR spectrum of **5a** ( $\text{CD}_2\text{Cl}_2$ , 500 MHz).

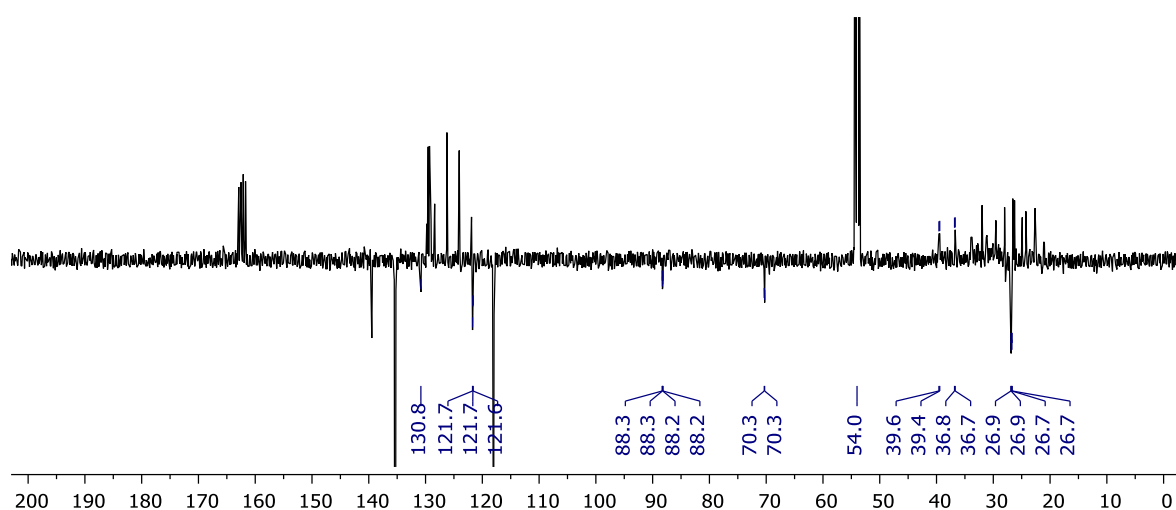

Figure S53.  $^{13}\text{C}\{^1\text{H}\}$  APT NMR spectrum of **5a** ( $\text{CD}_2\text{Cl}_2$ , 126 MHz).

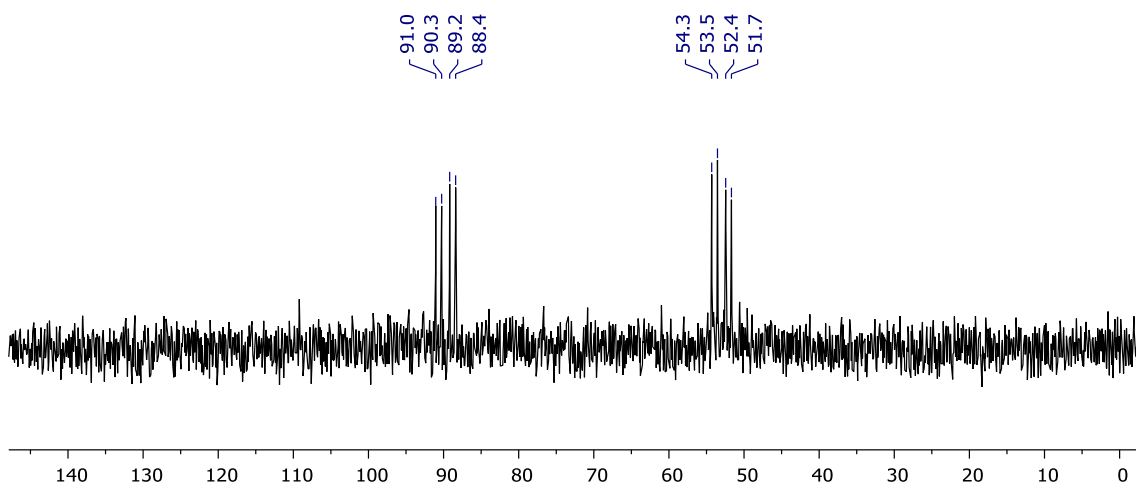

Figure S54.  $^{31}\text{P}\{^1\text{H}\}$  NMR spectrum of **5a** ( $\text{CD}_2\text{Cl}_2$ , 162 MHz).

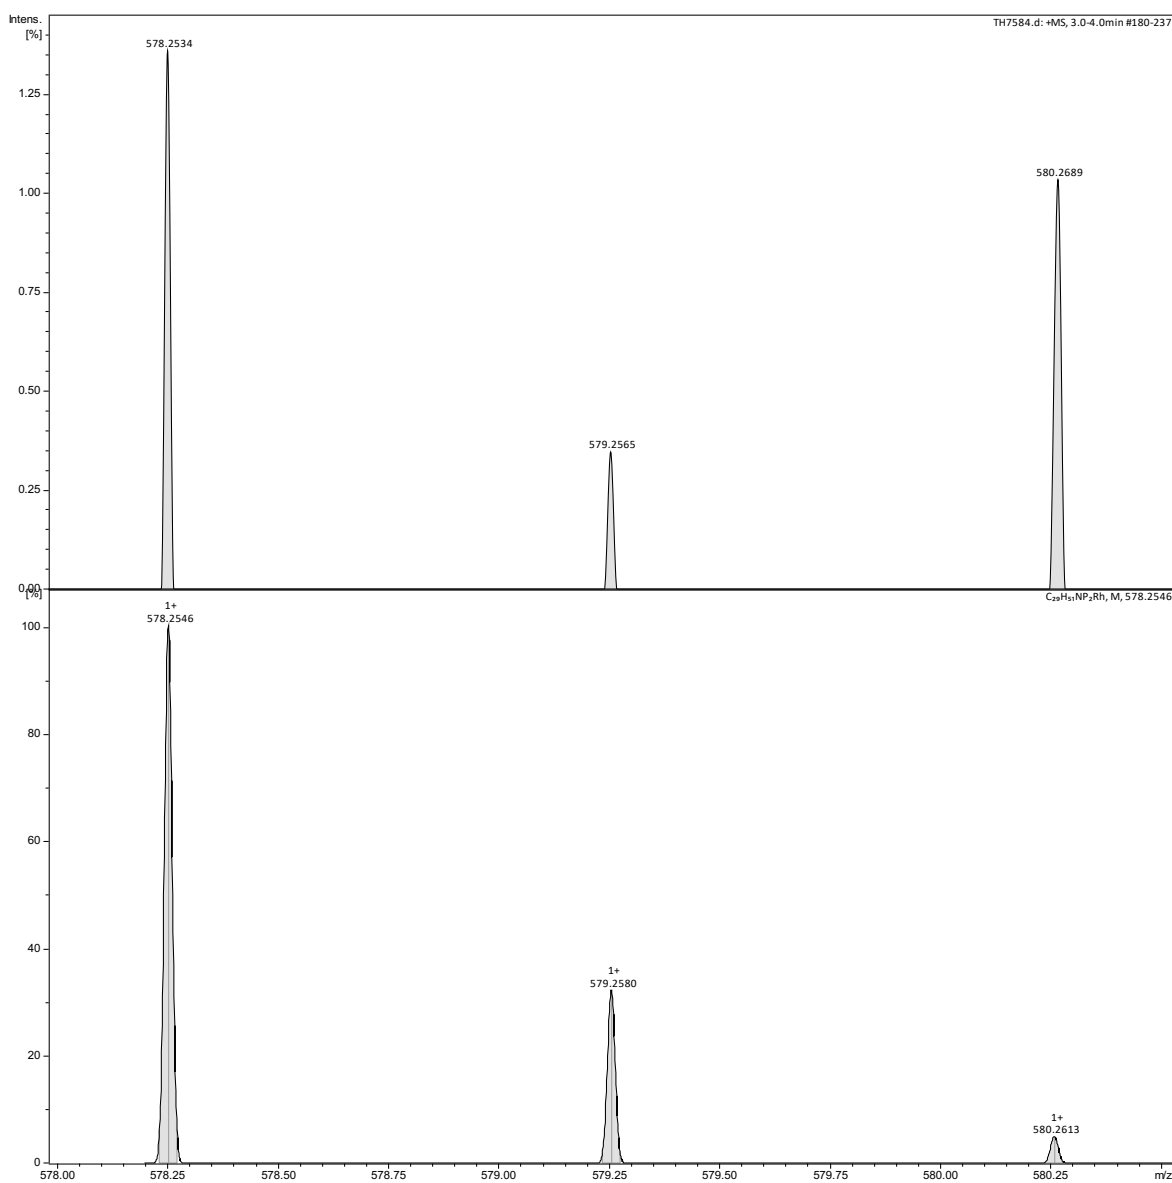

Figure S55. HR ESI-MS of **5a**.

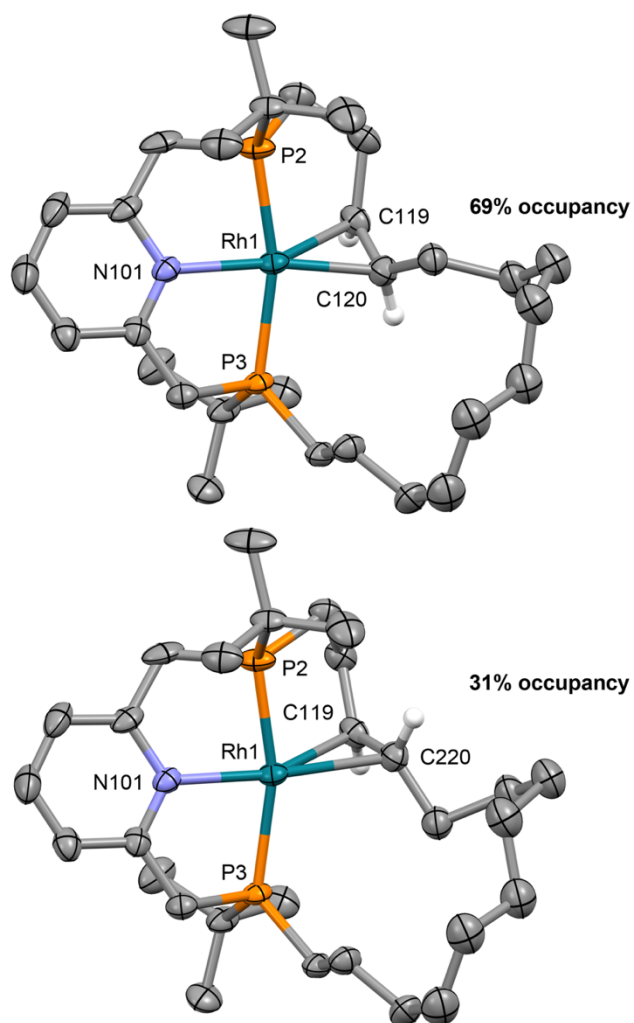

**Figure S56.** Solid-state structure of **5a** (both disordered components): thermal ellipsoids drawn at 30% probability, anion, solvent and most hydrogen atoms omitted. Selected bond lengths (Å) and angles (deg): Rh1-P2, 2.2349(15); Rh1-P3, 2.3153(14); Rh1-N101, 2.085(5); P2-Rh1-P3, 164.51(7); Rh1-Cnt(C119,C120), 2.038(5), Rh1-Cnt(C119,C220), 2.152(12); C119-C120 [restrained with C119-C220], 1.320(11); C119-C220, 1.336(14) [restrained with C119-C120]; N101-Rh1-Cnt(C119,C120), 167.4(2); N101-Rh1-Cnt(C119,C220), 166.4(3); Cnt = centroid.



## 9. Preparation of [Rh(*cis*-PNP-14)(CO)][BAR<sup>F</sup><sub>4</sub>] (**4b**)

A solution of *cis*-PNP-14 (8.3 mg, 17.4 μmol) and [Rh(COD)<sub>2</sub>][BAR<sup>F</sup><sub>4</sub>] (20.6 mg, 17.4 μmol) in DFB (0.5 mL) was mixed for 5 min at RT and then freeze-pump-thaw degassed and placed under an atmosphere of carbon monoxide for 5 min. Volitates were removed to afford the product as a yellow solid after washing with SiMe<sub>4</sub> (2×0.5 mL). Yield: 20.2 mg (13.7 μmol, 79%).

<sup>1</sup>H NMR (500 MHz, CD<sub>2</sub>Cl<sub>2</sub>): δ 7.78 (t, <sup>3</sup>J<sub>HH</sub> = 7.8, 1H, py), 7.70–7.74 (m, 8H, Ar<sup>F</sup>), 7.56 (br, 4H, Ar<sup>F</sup>), 7.43 (d, <sup>3</sup>J<sub>HH</sub> = 7.8, 2H, py), 3.75 (dvt, <sup>2</sup>J<sub>HH</sub> = 18.1, J<sub>PH</sub> = 4.2, 2H, pyCH<sub>2</sub>), 3.61 (dvt, <sup>2</sup>J<sub>HH</sub> = 18.1, J<sub>PH</sub> = 4.4, 2H, pyCH<sub>2</sub>), 1.96–2.07 (m, 2H, PCH<sub>2</sub>), 1.83–1.95 (m, 2H, PCH<sub>2</sub>), 1.66–1.77 (m, 2H, CH<sub>2</sub>), 1.38–1.53 (m, 6H, CH<sub>2</sub>), 1.22–1.38 (m, 16H, CH<sub>2</sub>), 1.26 (vt, J<sub>PH</sub> = 8, 18H, *t*Bu).

<sup>13</sup>C{<sup>1</sup>H} NMR (126 MHz, CD<sub>2</sub>Cl<sub>2</sub>): δ 193.6 (dt, <sup>1</sup>J<sub>RhC</sub> = 69, <sup>2</sup>J<sub>PC</sub> = 14, CO), 164.5 (vtd, J<sub>PC</sub> = 6, <sup>2</sup>J<sub>RhC</sub> = 1, py), 162.3 (q, <sup>1</sup>J<sub>CB</sub> = 50, Ar<sup>F</sup>), 141.1 (s, py), 135.4 (s, Ar<sup>F</sup>), 129.4 (qq, <sup>2</sup>J<sub>FC</sub> = 32, <sup>3</sup>J<sub>CB</sub> = 3, Ar<sup>F</sup>), 125.1 (q, <sup>1</sup>J<sub>FC</sub> = 272, Ar<sup>F</sup>), 122.5 (vt, J<sub>PC</sub> = 6, py), 118.0 (sept, <sup>3</sup>J<sub>FC</sub> = 4, Ar<sup>F</sup>), 38.2 (vt, J<sub>PC</sub> = 9, pyCH<sub>2</sub>), 32.6 (vtd, J<sub>PC</sub> = 14, <sup>2</sup>J<sub>RhC</sub> = 2, *t*Bu{C}), 31.2 (vt, J<sub>PC</sub> = 7, CH<sub>2</sub>), 28.5 (s, CH<sub>2</sub>), 27.6 (s, CH<sub>2</sub>), 27.4 (s, CH<sub>2</sub>), 27.1 (vt, J<sub>PC</sub> = 3, *t*Bu{CH<sub>3</sub>}), 27.0 (s, CH<sub>2</sub>), 26.7 (s, CH<sub>2</sub>), 23.9 (vtd, J<sub>PC</sub> = 12, <sup>2</sup>J<sub>RhC</sub> = 2, PCH<sub>2</sub>).

<sup>31</sup>P{<sup>1</sup>H} NMR (162 MHz, CD<sub>2</sub>Cl<sub>2</sub>): δ 60.8 (d, <sup>1</sup>J<sub>RhP</sub> = 122).

IR (CH<sub>2</sub>Cl<sub>2</sub>): ν(CO) 1997 cm<sup>-1</sup>.

HR ESI-MS (positive ion, 4 kV): 608.2649, ([M]<sup>+</sup>, calcd 608.2652) *m/z*.

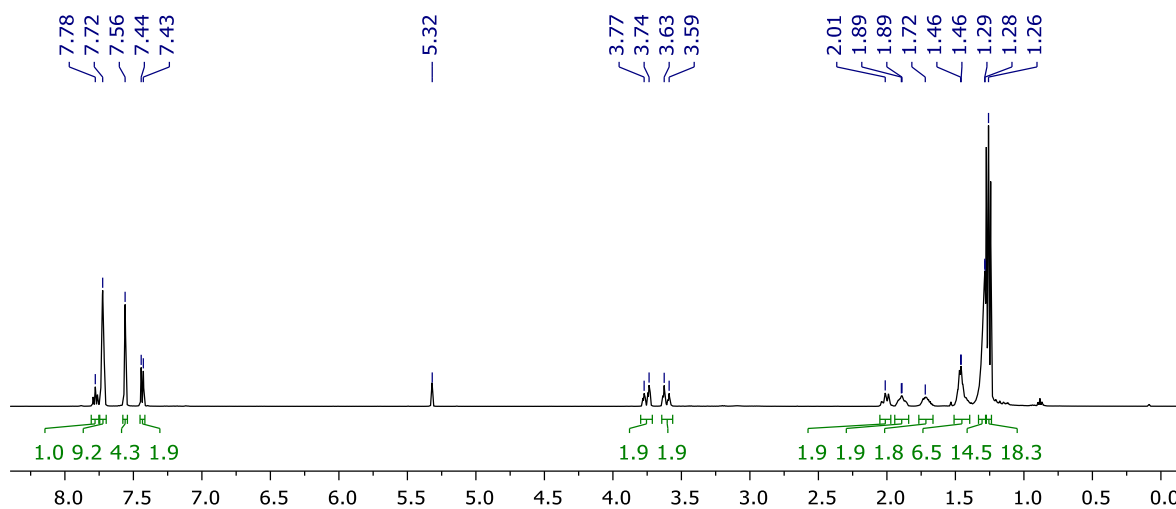

Figure S57. <sup>1</sup>H NMR spectrum of **4b** (CD<sub>2</sub>Cl<sub>2</sub>, 500 MHz).

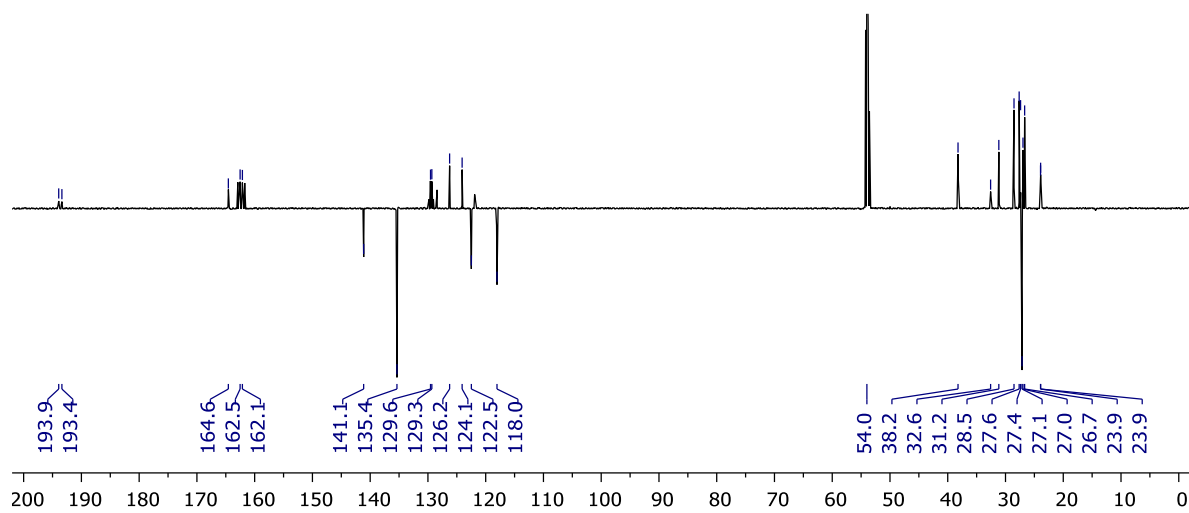

**Figure S58.**  $^{13}\text{C}\{^1\text{H}\}$  APT NMR spectrum of **4b** ( $\text{CD}_2\text{Cl}_2$ , 126 MHz).

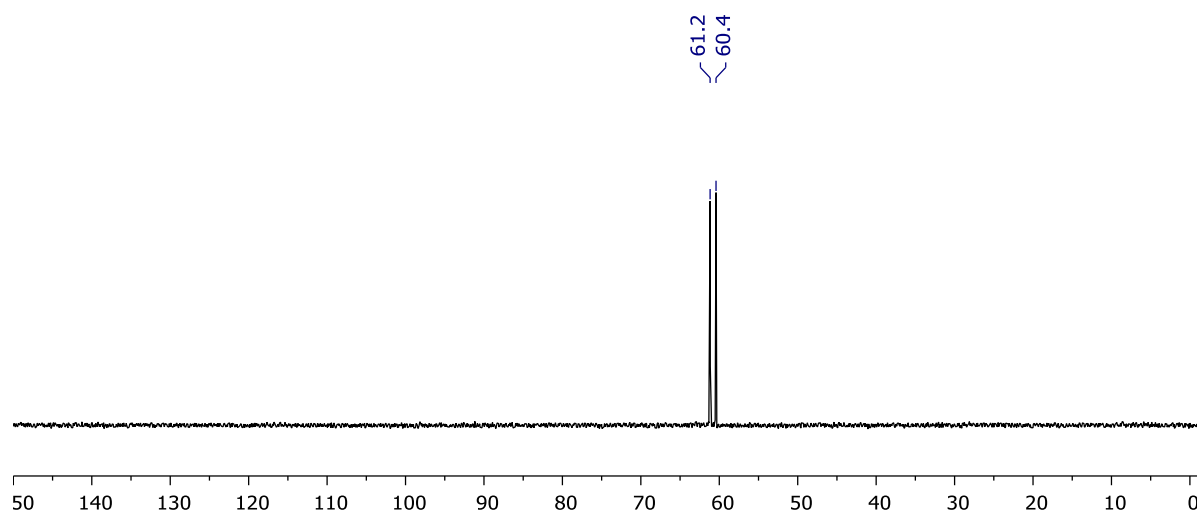

**Figure S59.**  $^{31}\text{P}\{^1\text{H}\}$  APT NMR spectrum of **4b** ( $\text{CD}_2\text{Cl}_2$ , 162 MHz).

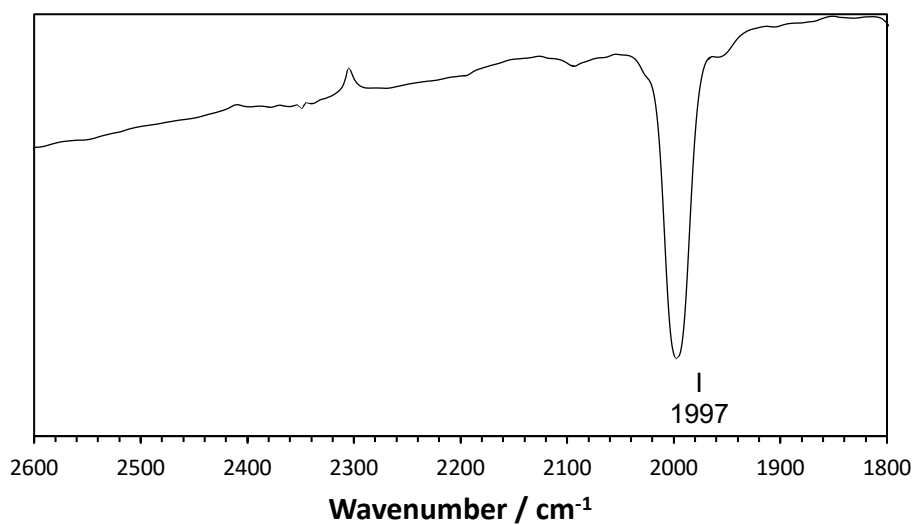

**Figure S60.** IR spectrum of **4b** recorded in  $\text{CH}_2\text{Cl}_2$ .

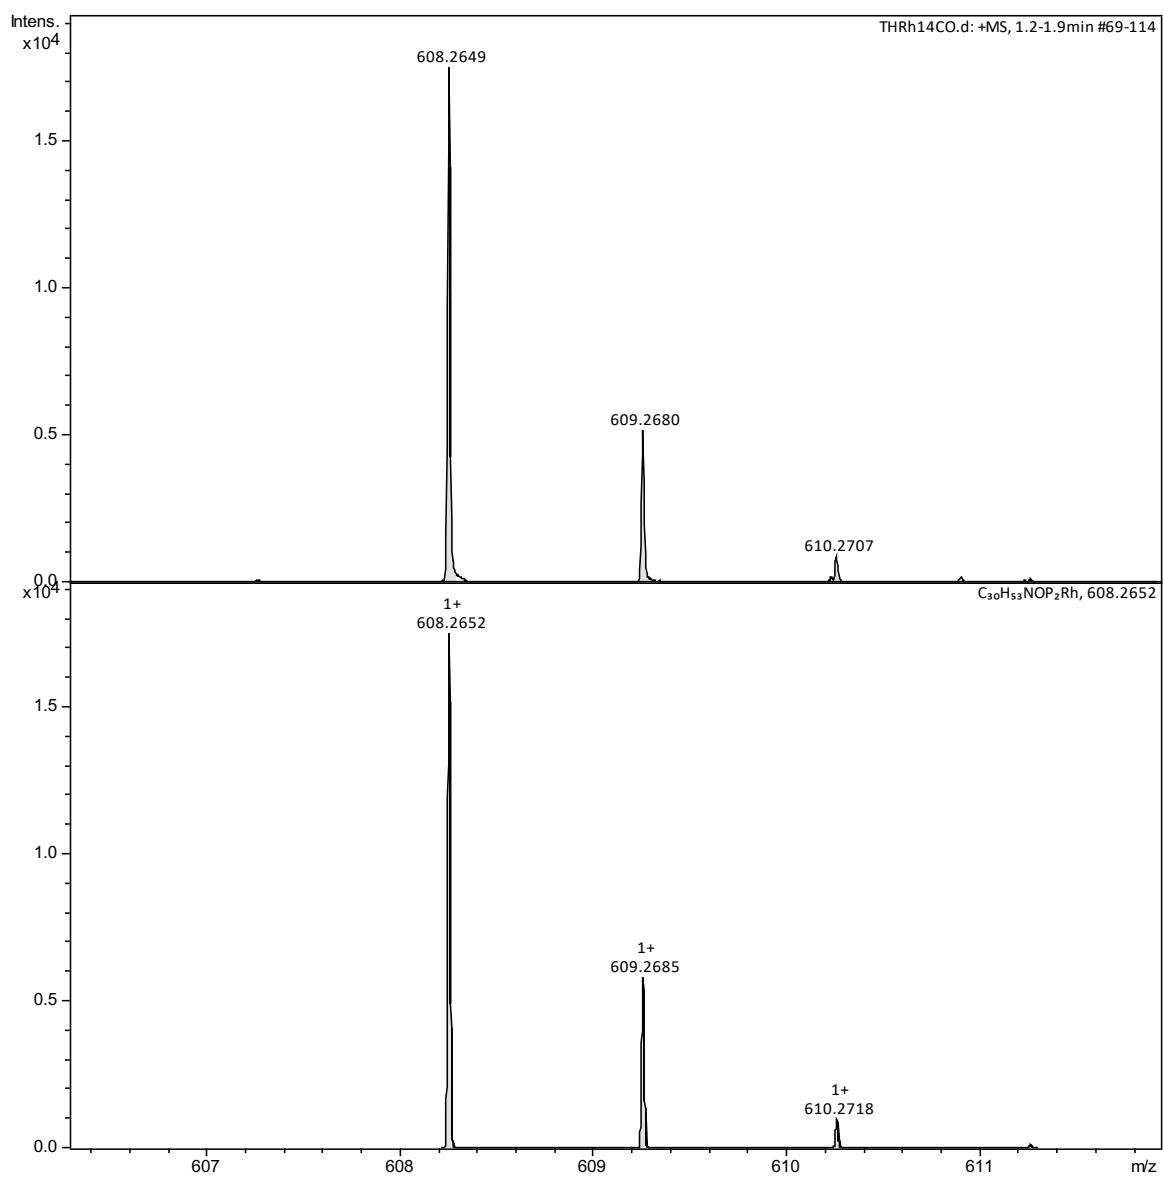

Figure S61. HR ESI-MS of 4b.

## 10. Preparation of [Rh(*trans*-PONOP-14)(*E*-*t*BuC≡CCHCH*t*Bu)][BAR<sup>F</sup><sub>4</sub>]

To a solution of [Rh(*trans*-PONOP-14)(C<sub>2</sub>H<sub>4</sub>)] [BAR<sup>F</sup><sub>4</sub>] (10 μmol, generated *in situ*) in DFB (0.5 mL) was added HC≡C*t*Bu (6.0 μL, 48.7 μmol) at RT. The resulting solution was heated at 80 °C for 3 days. Volatiles were removed *in vacuo* and the resulting yellow oil washed with SiMe<sub>4</sub> (0.5 mL). Recrystallisation by slow diffusion of SiMe<sub>4</sub> into an Et<sub>2</sub>O solution at -30 °C afforded the product was obtained as a yellow crystalline solid. Yield: 6.4 mg (3.97 μmol, 40%).

<sup>1</sup>H NMR (700 MHz, CD<sub>2</sub>Cl<sub>2</sub>): δ 7.89 (t, <sup>3</sup>J<sub>HH</sub> = 8.1, 1H, py), 7.70–7.74 (m, 8H, Ar<sup>F</sup>), 7.56 (br, 4H, Ar<sup>F</sup>), 7.31 (d, <sup>3</sup>J<sub>HH</sub> = 15.8, 1H, CH=CH*t*Bu), 6.80 (d, <sup>3</sup>J<sub>HH</sub> = 8.1, 1H, py), 6.79 (d, <sup>3</sup>J<sub>HH</sub> = 8.1, 1H, py), 6.01 (d, <sup>3</sup>J<sub>HH</sub> = 15.8, 1H, CH=CH*t*Bu), 2.60–2.73 (m, 2H, CH<sub>2</sub>), 2.41–2.50 (m, 1H, CH<sub>2</sub>), 2.13–2.20 (m, 1H, CH<sub>2</sub>), 1.75–1.95 (m, 2H, CH<sub>2</sub>), 1.68 (s, 9H C≡C*t*Bu), 0.96–1.66 (m, 22H, CH<sub>2</sub>), 1.19 (s, 9H, CH=CH*t*Bu), 1.18 (d, <sup>3</sup>J<sub>PH</sub> = 13.8, P*t*Bu), 1.07 (d, <sup>3</sup>J<sub>PH</sub> = 14.0, 9H, P*t*Bu).

<sup>13</sup>C{<sup>1</sup>H} NMR (176 MHz, CD<sub>2</sub>Cl<sub>2</sub>): δ 163.5 (d, <sup>2</sup>J<sub>PC</sub> = 3, py), 163.0 (d, <sup>2</sup>J<sub>PC</sub> = 3, py), 162.3 (q, <sup>1</sup>J<sub>CB</sub> = 50, Ar<sup>F</sup>), 157.7 (s, CH=CH*t*Bu), 146.9 (s, py), 135.3 (s, Ar<sup>F</sup>), 129.4 (qq, <sup>2</sup>J<sub>FC</sub> = 32, <sup>3</sup>J<sub>CB</sub> = 3, Ar<sup>F</sup>), 125.1 (q, <sup>1</sup>J<sub>FC</sub> = 272, Ar<sup>F</sup>), 118.0 (sept, <sup>3</sup>J<sub>FC</sub> = 4, Ar<sup>F</sup>), 115.3 (s, CH=CH*t*Bu), 104.7 (d, <sup>3</sup>J<sub>PC</sub> = 4, py), 104.6 (d, <sup>3</sup>J<sub>PC</sub> = 4, py), 85.7 (d, <sup>1</sup>J<sub>RhC</sub> = 11, C≡C*t*Bu), 68.1 (d, <sup>1</sup>J<sub>RhC</sub> = 12, C≡C*t*Bu), 42.6 (d, <sup>1</sup>J<sub>PC</sub> = 9, P*t*Bu{C}), 41.5 (vt, J<sub>PC</sub> = 7, P*t*Bu{C}), 35.7 (s, CH=CH*t*Bu{C}), 33.9 (s, C≡C*t*Bu{C}), 32.3 (s, C≡C*t*Bu{CH<sub>3</sub>}), 31.9 (d, <sup>2</sup>J<sub>PC</sub> = 3, CH<sub>2</sub>), 31.3 (d, <sup>2</sup>J<sub>PC</sub> = 5, CH<sub>2</sub>), 30.9 (br, 3×CH<sub>2</sub>), 30.7 (s, CH<sub>2</sub>), 30.4 (s, CH<sub>2</sub>), 30.23 (s, CH<sub>2</sub>), 30.22 (s, CH<sub>2</sub>), 29.8 (s, CH=CH*t*Bu{CH<sub>3</sub>}), 29.63 (s, CH<sub>2</sub>), 29.55 (s, CH<sub>2</sub>), 29.2 (s, CH<sub>2</sub>), 27.7 (d, <sup>2</sup>J<sub>PC</sub> = 6, P*t*Bu{CH<sub>3</sub>}), 26.5 (d, <sup>2</sup>J<sub>PC</sub> = 6, P*t*Bu{CH<sub>3</sub>}), 24.7 (s, PCH<sub>2</sub>), 24.2 (d, <sup>1</sup>J<sub>PC</sub> = 6, PCH<sub>2</sub>).

<sup>31</sup>P{<sup>1</sup>H} NMR (162 MHz, CD<sub>2</sub>Cl<sub>2</sub>): δ 204.5 (dd, <sup>2</sup>J<sub>PP</sub> = 395, <sup>1</sup>J<sub>RhP</sub> = 140, 1P), 194.5 (dd, <sup>2</sup>J<sub>PP</sub> = 395, <sup>1</sup>J<sub>RhP</sub> = 133, 1P).

HR ESI-MS (positive ion 4 kV): 748.3861 ([M]<sup>+</sup>, calcd 748.3853) *m/z*.

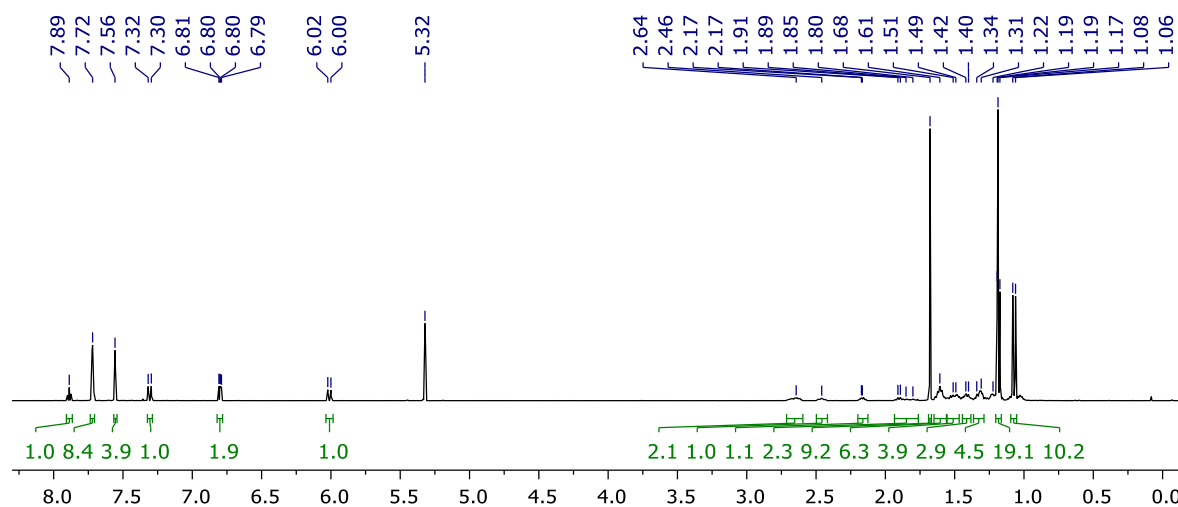

Figure S62. <sup>1</sup>H NMR spectrum of [Rh(*trans*-PONOP-14)(*E*-*t*BuC≡CCHCH*t*Bu)][BAR<sup>F</sup><sub>4</sub>] (CD<sub>2</sub>Cl<sub>2</sub>, 700 MHz).

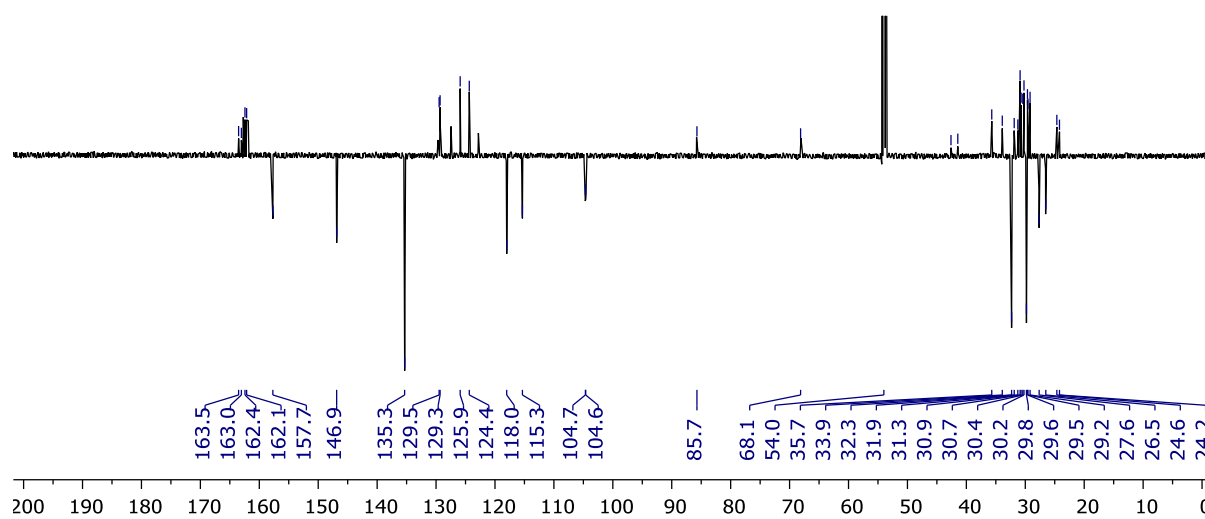

**Figure S63.**  $^{13}\text{C}\{^1\text{H}\}$  APT NMR spectrum of  $[\text{Rh}(\text{trans-PONOP-14})(E\text{-tBuC}\equiv\text{CCHCHtBu})][\text{BARF}_4]$  ( $\text{CD}_2\text{Cl}_2$ , 176 MHz).

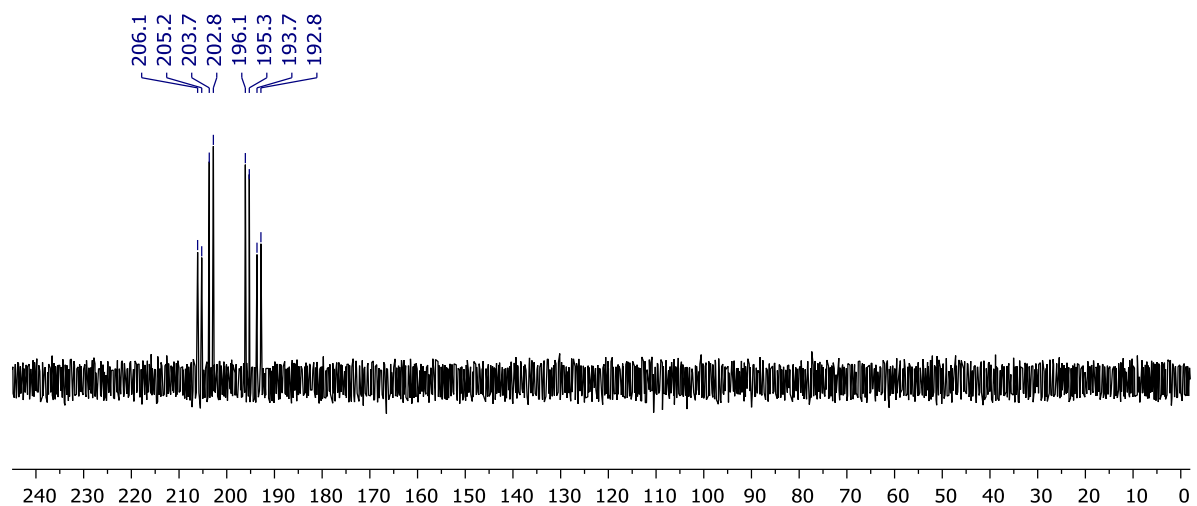

**Figure S64.**  $^{31}\text{P}\{^1\text{H}\}$  NMR spectrum of  $[\text{Rh}(\text{trans-PONOP-14})(E\text{-tBuC}\equiv\text{CCHCHtBu})][\text{BARF}_4]$  ( $\text{CD}_2\text{Cl}_2$ , 162 MHz).

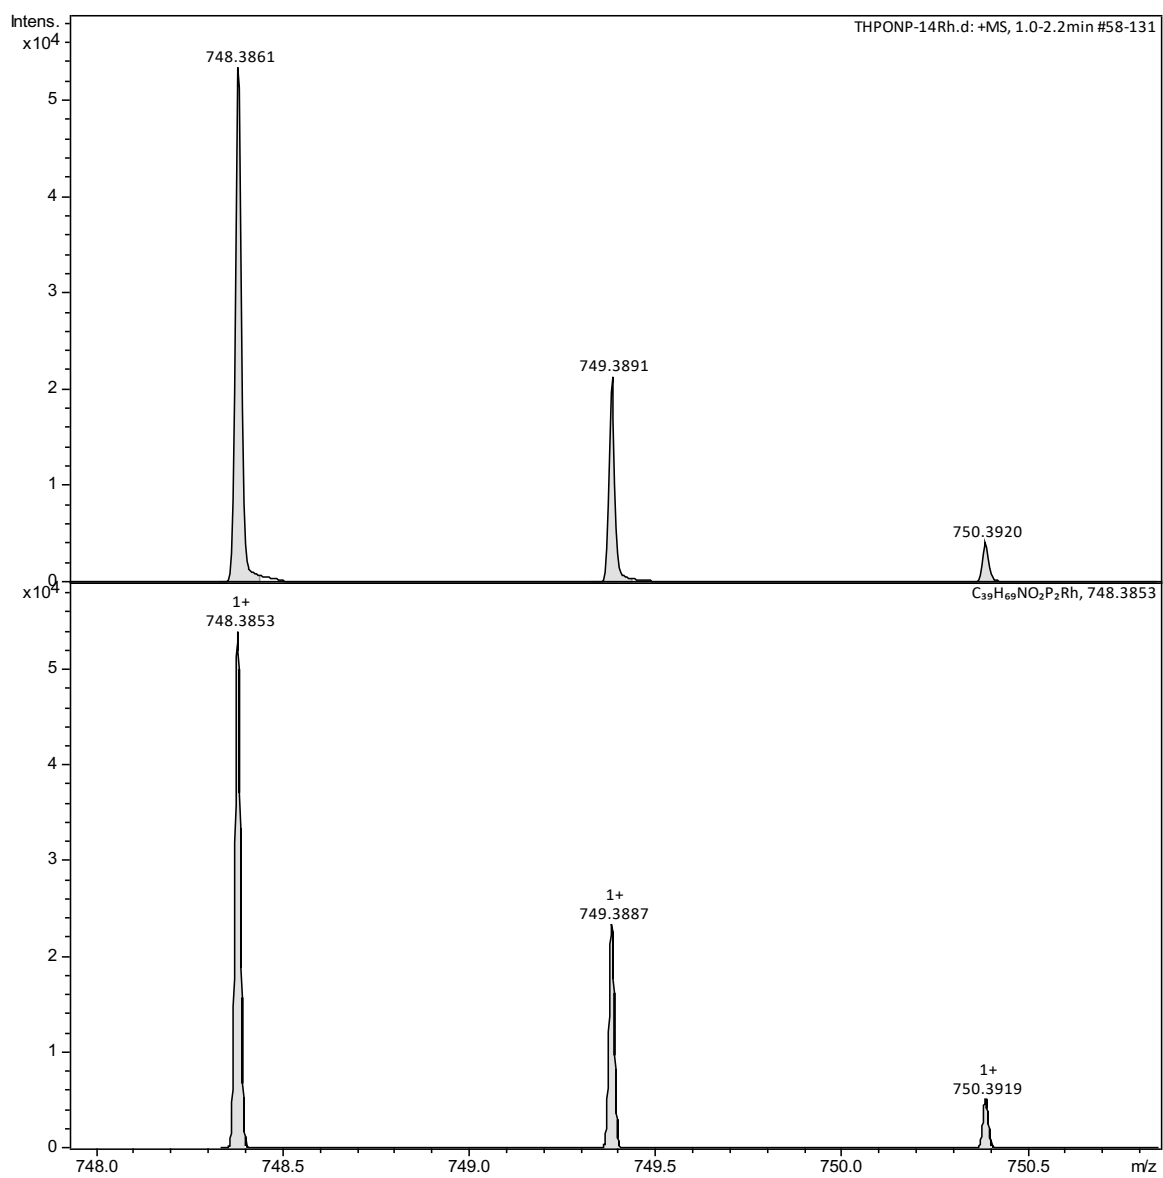

**Figure S65.** HR ESI-MS of [Rh(*trans*-PONOP-14)(*E*-*t*BuC≡CCHCH*t*Bu)][BARF<sub>4</sub>].

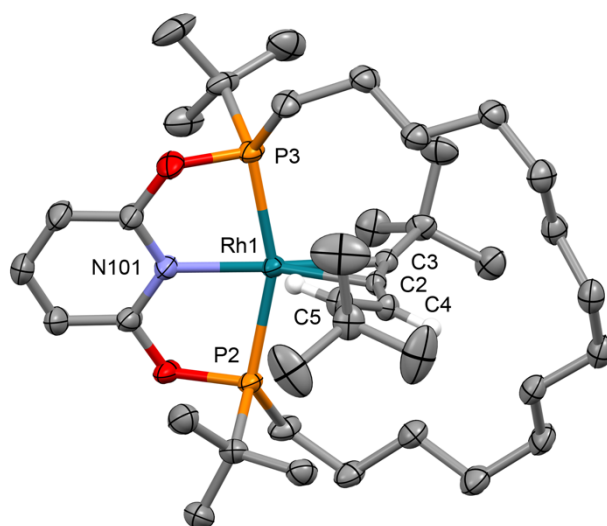

**Figure S66.** Solid-state structure of  $[\text{Rh}(\text{trans}\text{-PONOP-14})(\text{E}\text{-tBuC}\equiv\text{CCHCHtBu})][\text{BARF}_4]$ : thermal ellipsoids drawn at 50% probability, anion and most hydrogen atoms omitted. Selected bond lengths (Å) and angles (deg): Rh1-P2, 2.3118(10); Rh1-P3, 2.3159(9); Rh1-N101, 2.040(3); P2-Rh1-P3, 158.46(4); Rh1-Cnt(C2,C3), 2.061(2); C2-C3, 1.243(5); C2-C4, 1.447(5); C4-C5, 1.324(5); N101-Rh1-Cnt(C2,C3), 172.22(12); C2-C4-C5, 123.8(4); py-Rh-C $\equiv$ C twist, 77.1(3) Cnt = centroid.

## 11. References

- 1 M. R. Gyton, T. M. Hood and A. B. Chaplin, *Dalton Trans.*, 2019, **48**, 2877–2880.
- 2 T. M. Hood, M. R. Gyton and A. B. Chaplin, *Dalton Trans.*, 2020, **49**, 2077–2086.
- 3 E. Neumann and A. Pfaltz, *Organometallics*, 2005, **24**, 2008–2011.
- 4 A. Bismuto, S. P. Thomas and M. J. Cowley, *Angew. Chem. Int. Ed.*, 2016, **55**, 15356–15359.
- 5 C. Yang and S. P. Nolan, *J. Org. Chem.*, 2002, **67**, 591–593.
- 6 E. Negishi, T. Takahashi and K. Akiyoshi, *J. Organomet. Chem.*, 1987, **334**, 181–194
